# Supplementary material for: Understanding the uptake of new hip replacement implants in the UK: a cohort study using data from the National Joint Registry for England and Wales
Source: PubMed Central journal article supplement (PMC6886938; doi:10.1136/bmjopen-2019-029572), 2019-11-25
Supplement: bmjopen-2019-029572.draft_revisions.pdf [file bmjopen-2019-029572.draft_revisions.pdf]

# BMJ Open

BMJ Open is committed to open peer review. As part of this commitment we make the peer review history of every article we publish publicly available.

When an article is published we post the peer reviewers' comments and the authors' responses online. We also post the versions of the paper that were used during peer review. These are the versions that the peer review comments apply to.

The versions of the paper that follow are the versions that were submitted during the peer review process. They are not the versions of record or the final published versions. They should not be cited or distributed as the published version of this manuscript.

BMJ Open is an open access journal and the full, final, typeset and author-corrected version of record of the manuscript is available on our site with no access controls, subscription charges or pay-per-view fees (<http://bmjopen.bmj.com>).

If you have any questions on BMJ Open's open peer review process please email [info.bmjopen@bmj.com](mailto:info.bmjopen@bmj.com)

# BMJ Open

## Understanding the uptake of new hip replacement implants in the UK: Analysis of data from the National Joint Registry for England and Wales

|                               |                                                                                                                                                                                                                                                                                                                                                                                                                                                                                                                                                                                                                                                                                                                                                                                                                                                                                                                                                                                                                                                                                                                                                                                                                                                                                                                                                                                                                                                                                                                                                                                                                                                                                             |
|-------------------------------|---------------------------------------------------------------------------------------------------------------------------------------------------------------------------------------------------------------------------------------------------------------------------------------------------------------------------------------------------------------------------------------------------------------------------------------------------------------------------------------------------------------------------------------------------------------------------------------------------------------------------------------------------------------------------------------------------------------------------------------------------------------------------------------------------------------------------------------------------------------------------------------------------------------------------------------------------------------------------------------------------------------------------------------------------------------------------------------------------------------------------------------------------------------------------------------------------------------------------------------------------------------------------------------------------------------------------------------------------------------------------------------------------------------------------------------------------------------------------------------------------------------------------------------------------------------------------------------------------------------------------------------------------------------------------------------------|
| Journal:                      | <i>BMJ Open</i>                                                                                                                                                                                                                                                                                                                                                                                                                                                                                                                                                                                                                                                                                                                                                                                                                                                                                                                                                                                                                                                                                                                                                                                                                                                                                                                                                                                                                                                                                                                                                                                                                                                                             |
| Manuscript ID                 | bmjopen-2019-029572                                                                                                                                                                                                                                                                                                                                                                                                                                                                                                                                                                                                                                                                                                                                                                                                                                                                                                                                                                                                                                                                                                                                                                                                                                                                                                                                                                                                                                                                                                                                                                                                                                                                         |
| Article Type:                 | Research                                                                                                                                                                                                                                                                                                                                                                                                                                                                                                                                                                                                                                                                                                                                                                                                                                                                                                                                                                                                                                                                                                                                                                                                                                                                                                                                                                                                                                                                                                                                                                                                                                                                                    |
| Date Submitted by the Author: | 31-Jan-2019                                                                                                                                                                                                                                                                                                                                                                                                                                                                                                                                                                                                                                                                                                                                                                                                                                                                                                                                                                                                                                                                                                                                                                                                                                                                                                                                                                                                                                                                                                                                                                                                                                                                                 |
| Complete List of Authors:     | Penfold, Chris; University of Bristol, Musculoskeletal Research Unit, Translational Health Sciences, Bristol Medical School; University Hospitals Bristol NHS Foundation Trust and University of Bristol, National Institute for Health Research Bristol Biomedical Research Centre<br>Blom, AW; University of Bristol, Musculoskeletal Research Unit, Translational Health Sciences, Bristol Medical School; University Hospitals Bristol NHS Foundation Trust and University of Bristol, National Institute for Health Research Bristol Biomedical Research Centre<br>Sayers, Adrian; University of Bristol, Musculoskeletal Research Unit, Translational Health Sciences, Bristol Medical School; University of Bristol, Population Health Sciences, Bristol Medical School<br>Wilkinson, J. Mark; Northern General Hospital, Metabolic Bone Unit, Sorby Wing; University of Sheffield, 5. Department of Oncology and Metabolism and The Mellanby Centre for Bone Research<br>Hunt, Linda; University of Bristol, Musculoskeletal Research Unit, Translational Health Sciences, Bristol Medical School<br>Judge, Andrew; University of Bristol, Musculoskeletal Research Unit, Translational Health Sciences, Bristol Medical School; University Hospitals Bristol NHS Foundation Trust and University of Bristol, National Institute for Health Research Bristol Biomedical Research Centre<br>Whitehouse, Michael; University of Bristol, Musculoskeletal Research Unit, Translational Health Sciences, Bristol Medical School; University Hospitals Bristol NHS Foundation Trust and University of Bristol, National Institute for Health Research Bristol Biomedical Research Centre |
| Keywords:                     | Orthopaedic & trauma surgery < SURGERY, Joint replacement, Implant, Patient, Surgeon, National Joint Registry                                                                                                                                                                                                                                                                                                                                                                                                                                                                                                                                                                                                                                                                                                                                                                                                                                                                                                                                                                                                                                                                                                                                                                                                                                                                                                                                                                                                                                                                                                                                                                               |
|                               |                                                                                                                                                                                                                                                                                                                                                                                                                                                                                                                                                                                                                                                                                                                                                                                                                                                                                                                                                                                                                                                                                                                                                                                                                                                                                                                                                                                                                                                                                                                                                                                                                                                                                             |

SCHOLARONE™  
Manuscripts

# Understanding the uptake of new hip replacement implants in the UK: Analysis of data from the National Joint Registry for England and Wales

Chris M Penfold<sup>1+2\*</sup>

Ashley W Blom<sup>1+2</sup>

Adrian Sayers<sup>1+3</sup>

J Mark Wilkinson<sup>4+5</sup>

Linda P Hunt<sup>1</sup>

Andrew Judge<sup>1+2</sup>

Michael R Whitehouse<sup>1+2</sup>

## Affiliations:

1. Musculoskeletal Research Unit, Translational Health Sciences, Bristol Medical School, 1st Floor Learning & Research Building, Southmead Hospital, Bristol, BS10 5NB, UK
2. National Institute for Health Research Bristol Biomedical Research Centre, University Hospitals Bristol NHS Foundation Trust and University of Bristol.
3. Population Health Sciences, Bristol Medical School, University of Bristol, Bristol
4. Metabolic Bone Unit, Sorby Wing, Northern General Hospital, Sheffield, S5 7AU, UK
5. Department of Oncology and Metabolism and The Mellanby Centre for Bone Research, University of Sheffield

1  
2  
3 \* - denotes corresponding author  
4  
5

6  
7 Corresponding author contact details:  
8

9 Email: [chris.penfold@bristol.ac.uk](mailto:chris.penfold@bristol.ac.uk)  
10

11 Address: Musculoskeletal Research Unit, University of Bristol, School of Clinical Sciences, Learning and  
12 Research Building, Southmead Hospital, Bristol, BS10 5NB  
13

14  
15 Telephone: 0117 41 47872  
16  
17

## 18 19 20 Keywords

21  
22 Orthopaedics, joint replacement, implant, patient, surgeon, national joint registry  
23  
24

## 25 26 27 Data sharing statement

28  
29 Access to the data analysed in this study required permission from the National Joint Registry for  
30 England, Wales and Northern Ireland Research Sub-committee.  
31

32 <http://www.njrcentre.org.uk/njrcentre/Research/Researchrequests/tabid/305/Default.aspx> contains  
33 information on research data access request to the National Joint Registry.  
34  
35

## 36 37 38 Acknowledgements

39  
40 We thank the patients and staff of all the hospitals who have contributed data to the National Joint  
41 Registry. We are grateful to the Healthcare Quality Improvement Partnership, the National Joint Registry  
42 Steering Committee, and staff at the National Joint Registry for facilitating this work.  
43  
44  
45

## 46 47 48 Disclaimer

49  
50 The views expressed represent those of the authors and do not necessarily reflect those of the National  
51 Joint Registry Steering Committee or Healthcare Quality Improvement Partnership, who do not vouch  
52 for how the information is presented. The views expressed in this article are those of the authors and  
53 not necessarily those of the NHS, the NIHR, or the Department of Health and Social Care.  
54  
55  
56

## Ethics approval

Patient consent was obtained for data collection by the National Joint Registry. According to the specifications of the NHS Health Research Authority, separate informed consent and ethical approval were not required for the present study.

## Author Contributions

CP, AB, AJ and MW designed the study. CP, AB, AS, JMW, LH, AJ and MW reviewed the published work. CP conducted the statistical analysis and wrote the report. CP had full access to all the data and AB is the guarantor.

## Conflicts of Interest

Competing interests: All authors have completed the ICMJE uniform disclosure form at [www.icmje.org/coi\\_disclosure.pdf](http://www.icmje.org/coi_disclosure.pdf) and declare: no support from any organisation for the submitted work. AB and MW are involved in a separate grant to the University of Bristol funded by Stryker. All other authors declare no financial relationships with any organisations that might have an interest in the submitted work in the previous three years. All authors declare no other relationships or activities that could appear to have influenced the submitted work.

## Funding

This study was funded by the NIHR Biomedical Research Centre at University Hospitals Bristol NHS Foundation Trust and the University of Bristol. The views expressed in this publication are those of the authors and not necessarily those of the NHS, the National Institute for Health Research or the Department of Health and Social Care. Adrian Sayers was supported by a MRC fellowship MR/L01226X/1.

## Word count

3213 words

## Abstract

### Objectives

Primary: to describe the uptake of new implant components (femoral stem or acetabular cup/shell) for total hip replacements (THRs) in the National Joint Registry for England and Wales (NJR). Secondary: to compare the characteristics of: a) surgeons and b) patients who used/received new rather than established components.

### Design

A cohort of 618,393 primary THRs performed for osteoarthritis ( $\pm$  other indications) by 4,979 surgeons between 2008-2017 in England and Wales from the NJR. We described the uptake of new (first recorded in NJR >2008) stems/cups, and variation in uptake by operating surgeons (primary objectives). We explored surgeon-level and patient-level factors associated with use/receipt of new components with logistic regression models (secondary objectives).

### Outcomes

Primary outcomes: total number of new cups/stems, and proportion of operations using new versus established components. Secondary outcomes: odds of: a) a surgeon using a new cup/stem in a calendar-year, b) a patient receiving a new rather than established cup/stem.

### Results

Sixty-eight new cups and 72 new stems were used in 72,349 primary THRs (11.7%) by 2,423 surgeons (48.7%) 2008-2017. Surgeons used a median of one new stem and cup (IQR=1-2 both, max=11 cups, max=9 stems). Surgeons performed a median of 22 THRs (IQR 5-124, range 1-3,938), a median of 5.0% (IQR 1.3-16.1%) and 9.4% (IQR 2.8-26.7%) used new stems and cups respectively. Patients aged <55 years old versus those 55-80 had higher odds of receiving a new rather than established stem (OR=2.13, 95%CI 2.04-2.23) and cup (OR=1.40, 95%CI 1.34-1.45). Women had lower odds of receiving a new stem (OR=0.81, 95%CI 0.78-0.84), higher odds of receiving a new cup (OR=1.11, 95%CI 1.08-1.14).

### Conclusions

Large numbers of new THR components have been introduced in the NJR since 2008. Half of surgeons have tried new components, with wide variation in how many types and how often they have been used.

## Article Summary

### Strengths and limitations of this study

- This study provides a nationally representative description of the uptake of new implant components for total hip replacements in England and Wales.
- This is the first study to describe the variation in uptake of new components by surgeons, and surgeon characteristics which may be associated with the use of new components.
- Although implant component brand names were checked by the authors, some components may have been reclassified or we may still have misclassified some components as either new or established, but the introduction of unique device identifiers should remove this problem in future.
- The surgeon assigned as lead operating surgeon in the NJR may not be correct, although consistency between our sensitivity and primary analyses indicate that this is unlikely to have substantially affected our findings.
- Hospital-level or regional variation in suppliers may be important factors affecting implant uptake, but these were beyond the scope of this study.

## Background

Total hip replacements (THRs) are mainly performed to treat pain and functional limitation due to osteoarthritis (OA).[1] It is a highly successful surgical procedure with typical 10-year revision rates <5%,[2] the current NICE benchmark.[3] However, younger patients are more likely to require revision surgery; the lifetime revision risk for men having a THR in their 50s is ~35% compared with 5% in their 70s.[4] Such patients may benefit the most from developments in THR that lead to reduced revision rates or improved outcomes.

Some new implant designs intended to benefit these more active and/or younger patients have been high-profile failures, for example metal-on-metal THRs [5] including the Articular Surface Replacement (ASR) prostheses in particular.[6] Many new implants, the ASR included,[7] were introduced with minimal supporting evidence of their effectiveness [8] and may offer at best no improvement over pre-existing components.[9] An influential agenda for surgery research (IDEAL) was developed, providing a framework for future investigations into surgical innovations, which recommended the phased introduction of new medical devices.[10] The rapid uptake of metal-on-metal THRs was found to be inconsistent with this, it is not clear whether the introduction of newer implants since has followed the framework.

There is wide variation between and within regions of common surgical procedures.[11] The large number of different components used in primary THRs (127 femoral stems and 105 acetabular cups recorded in the National Joint Registry for England, Wales, Northern Ireland and the Isle of Man (NJR) in 2016) [12] may be an important source of variation. Many registries describe the volume of different implant components used annually but not the variation in uptake of new implants between surgeons or which patients receive them. More research is needed to understand and reduce avoidable variation in outcomes created by differences in surgical activity.

We aimed to:

1. Describe the uptake of new implants for THRs in the NJR
2. Describe how this uptake varies by surgeons
3. Compare surgeons who use new compared with established components
4. Compare patients who receive new compared with established components



## Methods

### Data Source

The NJR was established in 2003.[2] Data entry for Northern Ireland and the Isle of Man did not commence until 2013 and 2015, respectively therefore they are excluded from this analysis.

### Study sample

We included the cohort of patients who received a primary THR for OA ( $\pm$  other indications) between 1<sup>st</sup> January 2008 and 26<sup>th</sup> February 2017. We used NJR data from 2003 onwards to calculate the date each implant component was first used and the total number of implantations. We excluded people who had not given consent for recording of personal details, those who received a resurfacing rather than stemmed THR, and where the brand of their acetabular or femoral components was uncertain.

### Patient involvement

This study was designed and undertaken without patient involvement.

### Definition of new and established implant components

We identified the implant component brand from component labels recorded in the NJR and categorised all femoral (stem) or acetabular (cup or shell) components with a first recorded use by any surgeon in the NJR on or after 1<sup>st</sup> January 2008 as 'new'. Components with a first recorded use before 2008 were categorised as 'established'.

### Surgeon uptake of new implant components

All surgeons with operations recorded in the NJR are assigned an anonymised identifier and their role in the operation ("consultant in charge" or "operating") is recorded. We summarised each operating surgeon's activity across each calendar-year in which they performed  $\geq 1$  THR. We considered five potential surgeon-level factors which may be associated with use of a new component in a calendar-year: total volume of THRs performed in that year, proportion of those THRs performed on patients <55 years old (<10% and  $\geq 10\%$ ), source of funding for THRs ('100% NHS funded' or 'some or all privately funded'), proportion of THRs performed on patients with an American Society of Anaesthesiologists (ASA) grade III-V (<25% and  $\geq 25\%$ ), and the range of stem-cup combinations used in that calendar-year (' $\leq 3$ ', '4-6', '7-10' and '>10').

### Patients receiving new implant components

We used date of surgery to order patients within implant components and within surgeons. We categorised patients according to whether the component they received was new or established. We considered five potential patient-level factors which may be associated with their receipt of new components: age at the time of THR (<55, 55-80, and 80+ years), gender, body mass index (BMI), ASA grade, and NHS or private funding.

### Statistical analyses

We described the use of unique stems and cups in primary THRs performed since January 1<sup>st</sup> 2008, the cumulative use of new components in patients, and the count of surgeons who used new components. We also described the total number of all and new cups, stems, and combinations.

### *Surgeon-level factors*

In analyses of surgeon-level and patient-level factors associated with use of or receipt of new implants we included only those people with complete exposure and outcome data for the surgeon-level and patient-level analysis models (i.e. complete case analysis). We assumed that data were missing at random but did not use multiple imputation to account for these missing data since there were no variables in the NJR dataset which were not already in our regression models and which may have carried information about the missing data (particularly BMI).

Our outcome was whether a surgeon used a new component at least once for a THR in a calendar-year (stems and cups analysed separately), unit of analysis was surgeon calendar-years and exposure variables were those surgeon-level factors defined previously. We used multivariable adjusted logistic regression models, accounting for the clustering of calendar-years within surgeons.

### *Patient-level factors*

Our outcome was whether a patient received a new rather than established component (stems and cups analysed separately), unit of analysis was patients and exposure variables were those patient-level factors defined previously. Patient-level factors were included in multivariable adjusted mixed-effects logistic regression models, with patients nested within surgeons.

### *Sensitivity analyses*

We conducted two sensitivity analyses. To determine whether the lack of variability in patients operated on by low volume surgeons affected our results we repeated our surgeon-level analysis excluding calendar-years for surgeons in which they performed <10 THRs. We also considered that the choice of

1  
2  
3 component was made by the consultant in-charge rather than the operating surgeon (the consultant in-  
4 charge was not the operating surgeon for ~16% of THRs). We repeated our surgeon-level analysis by  
5 consultant in-charge and repeated our patient-level analysis with patients clustered within consultant  
6 in-charge.  
7  
8  
9

10 All analyses were performed using Stata v15 (StataCorp).  
11  
12  
13  
14

## 15 Results

### 16 Overall use of implant components

17  
18 Between 1<sup>st</sup> January 2008 and 26<sup>th</sup> February 2017, 618,393 primary THRs were performed for OA in  
19 England and Wales and recorded in the NJR. The mean age of the patients was 68.5 years (SD=11.1  
20 years), 60.7% were female, their ASA grades were I:14.2%, II:69.9%, III:15.5% and IV/V:0.5%. Twenty-  
21 three percent had a normal/underweight BMI, 39.6% were overweight and 37.6% obese. THRs were  
22 performed by 4,979 surgeons using 189 different stems, 187 cups and 2,026 stem-cup combinations.  
23 Surgeons used a median of three different stems (IQR=2-5, max=21), four cups (IQR=2-7, max=27) and  
24 five combinations (IQR=2-9, max=60), and performed a median of 22 THRs over the period (IQR 5-124,  
25 range 1-3,938).  
26  
27  
28  
29  
30  
31  
32

### 33 Use of new implant components

34  
35 During this period 68 new cups (47 uncemented, Table S1) and 72 new stems (51 uncemented, Table S2)  
36 were first used. The rate of introduction of new cups and stems remained stable (~16 new  
37 components/year, Figure S1). Twelve percent (n=72,349) of THRs performed used a new stem, cup, or  
38 combination. In 2016, 14.9% of THRs used a new cup (n=12,768/85,835) and nine percent a new stem  
39 (n=7,744, Figure 1). Forty eight percent (n=2,423) of surgeons who performed a THR in this period used  
40 at least one new implant component.  
41  
42  
43  
44  
45

46 New cups were used in 9.0% (n=55,360) THRs performed by 41.5% (n=2,066) surgeons (Table S1), new  
47 stems in 4.7% (n=28,924) THRs by 26.4% (n=1,313) surgeons (Table S2) and new combinations in 1.9%  
48 (n=11,935) THRs by 12.5% (n=624) surgeons. Most new cups (n=31,448, 56.8%) and almost all new  
49 stems (n=25,684, 88.8%) were uncemented. The median number of new stems, cups and combinations  
50 used by surgeons was one (IQR=1-2, cups max=11, stems max=9 and combinations max=13; Tables S3-  
51 S5). The median THRs performed using new stems was three (IQR 1-12, max=769) and new cups was  
52  
53  
54  
55  
56  
57  
58  
59  
60

four (IQR 1-17, max=1,211). The median proportion of a surgeon's THRs performed using new stems was 5.0% (IQR 1.3-16.1%), new cups 9.4% (IQR 2.8-26.7%) and new combinations 3.6% (IQR 0.9-13.3%).

The five most frequently implanted new stems were used in 18,528 THRs (63.1% of THRs using a new stem, Table S2). The five most frequently implanted new cups were used in 44,633 THRs (80.6% of THRs using a new cup, Table S1). Uptake of the two most popular new cups was rapid (5,000 uses of Exeter X3 Rimfit <1,000 days, 5,000 uses of Trinity ~1,500 days after first use, Figure 2) but was slower for new stems (5,000 uses of Polarstem Cementless ~2,800 days, Figure 2). Conversely, a third of the new stems and cups (n=24/72 new stems, n=24/69 new cups) have been used in ≤10 THRs.

### Surgeon-level and patient-level factors associated with new implant components

Our complete case analysis included 431,955 out of a possible 618,393 THRs (69.8%) and 19,810 surgeon calendar-years (Figure S2). We were missing data for BMI (n=186,308, 30.1%) and source of funding (n=1,514, 0.2%).

#### *Characteristics of surgeons using new implant components*

Multivariable adjusted associations between surgeon-level factors and their use of new components in a calendar-year were consistent between stems and cups (Table 1, unadjusted Table S6). Surgeons who treated more younger patients had 51% higher odds of using a new stem (OR=1.51, 95%CI 1.34-1.69, p<0.001) and 45% higher odds of using a new cup (OR=1.45, 95%CI 1.32-1.59, p<0.001) in a calendar-year. Those who performed more THRs/year had 2% and 8% higher odds of using new stems (OR=1.02, 95%CI 1.00-1.05, p=0.03) and cups respectively (OR=1.08, 95%CI 1.05-1.10, p<0.001). Private funding was associated with 23% increased odds of using new stems (OR=1.23, 95%CI 1.06-1.42, p=0.006) and weakly associated with 11% increased odds of using new cups (OR=1.11, 95%CI 0.98-1.25, p=0.10). Use of more stem-cup combinations was strongly associated with increased use of new components (ORs for '>10' vs. '≤3' combinations: 23.3 and 13.9 for stems and cups respectively, p values <0.001). Proportion of patients with ASA grades III-IV was associated with 23% higher odds of using new cups (OR=1.23, 95%CI 1.12-1.35, P<0.001) but not with using new stems (OR=1.09, 95%CI 0.96-1.22, p=0.18).

#### *Characteristics of patients receiving new implant components*

A higher proportion of recipients of new compared with established implant components were aged <55 years old (10.2% established vs. 21.1% new stems; 10.4% established vs. 14.6% new cups; Table 2), although the main recipients of all components were aged 55-80 years. Fifteen percent of recipients of established stems (15.2%) were ≥80 years old compared with 7.6% of recipients of new stems, but there

1  
2  
3 was little difference in the proportion of older recipients of established (14.9%) and new (13.5%) cups.  
4  
5 Across all components and component age, women were the main recipients of THR. There was no  
6  
7 difference in BMI between recipients of established and new stems or cups. A higher proportion of  
8  
9 recipients of new components had ASA grade I (20.1% new vs. 14.2% established stems; 16.5% new vs.  
10  
11 14.3% established cups). A higher proportion of people with privately funded THRs had new  
12  
13 components (stems: 18.4% new vs. 12.8% established; cups: 18.6% new vs. 12.5% established).

14  
15 Multivariable adjusted mixed effects logistic regression models (Table 2, unadjusted Table S7) found  
16  
17 that patients <55 years old, compared with those 55-80, had 113% and 40% higher odds of receiving a  
18  
19 new rather than established stem (OR=2.13, 95%CI 2.04-2.23, p<0.001) and cup (OR=1.40, 95%CI 1.34-  
20  
21 1.45, p<0.001). Women had 19% lower odds than men of receiving a new stem (OR=0.81, 95%CI 0.78-  
22  
23 0.84, p<0.001), but 11% higher odds of receiving a new cup (OR=1.11, 95%CI 1.08-1.14, p<0.001). There  
24  
25 was weak evidence that people with higher BMI had 14% higher odds of receiving a new stem (OR for  
26  
27 underweight/normal vs. Class II Obese=1.14, 95%CI 1.07-1.22, p<0.001) but BMI was not associated with  
28  
29 receiving a new cup (e.g. OR for underweight/normal vs. Class II Obese=0.97, 95%CI 0.93-1.02, p=0.29).  
30  
31 Higher ASA grade was associated with 40% lower odds of receiving new stems (OR for ASA grades 'IV +  
32  
33 V' versus 'I' = 0.60, 95%CI 0.45-0.80, p<0.001), but associated with 26% higher odds of new cups (OR for  
34  
35 ASA grades 'IV + V' versus 'I' = 1.26, 95%CI 1.06-1.51, p=0.01). Patients with private versus NHS funding  
36  
37 had six percent lower odds of receiving new stems (OR=0.94, 95%CI 0.89-0.99, p=0.02), but 13% higher  
38  
39 odds of receiving new cups (OR=1.13, 95%CI 1.08-1.18, p<0.001).

### 36 Sensitivity analyses

38  
39 Results of our first sensitivity analyses (excluding calendar-years for surgeons with <10 THRs) differed  
40  
41 only minimally from our primary analyses (Table S8), indicating that our results were not biased by low-  
42  
43 volume surgeons. Results of our second sensitivity analyses ('consultant in-charge' as the clustering  
44  
45 variable) also differed only minimally from our primary analyses (Tables S9-S10).

### 47 Discussion

49  
50 Sixty-eight new cups and 72 new stems were first used in THRs in the NJR for OA between 2008 and  
51  
52 2017. Most THRs used components introduced before 2008 but 12% used a new stem or cup. Uptake of  
53  
54 some new implant components was very rapid. Conversely, uptake of a third of new components has  
55  
56 been slow. Most surgeons used a maximum total of seven different cups or stems, of which one or two  
57  
58

1  
2  
3 were new components. A small number of surgeons used a wide variety of different components,  
4 including new stems, cups and combinations.  
5

6  
7 Strengths of our study include the use of the NJR dataset, the largest arthroplasty register with  
8 comprehensive data capture (>95% in the period studied). This is the first to describe the variation in  
9 factors associated with uptake of new implant components by surgeons and receipt of new components  
10 by patients. Our study has several weaknesses. We classified a component as new based on the first  
11 record of a brand name in the NJR, but this does not exclude the possibility that a component was  
12 introduced earlier to other markets outside the UK. Furthermore, new components may constitute  
13 procedures not uploaded to the NJR (missing primary THRs estimated <5%). Also, some of these  
14 components may be minor modifications or a rebadged/renamed version of an existing component and  
15 some may also cover successive versions of a component. The correct operating surgeon may not be  
16 assigned to every operation. The extent to which this applies is unknown but may result in inaccurate  
17 estimates of surgeon-level associations, although our sensitivity analyses indicate that this is unlikely.  
18 The associations we have reported may be confounded by unmeasured factors (residual confounding)  
19 and in the absence of pre-existing literature on the uptake of new implants the findings from the  
20 regression models should be considered exploratory. We were missing BMI data for some people and  
21 elected not to use multiple imputation to account for these missing data. Finally, we did not have data  
22 on hospital-level factors or regional variation in suppliers in our analyses, which may be drivers of  
23 selection.[13]  
24  
25  
26  
27  
28  
29  
30  
31  
32  
33  
34  
35

36 Approximately 16 new implant components/year (stems and cups) were introduced in the NJR between  
37 2008-2017. Comparisons with Australia (34 implant components/year 2003-2008) [14] and Finland (2-4  
38 components/year 1980-2013) [15] suggest that this rate is not unusual, but that there is large variation  
39 internationally. The rapid uptake of some new components indicates that phased introduction, as  
40 recommended in the IDEAL Framework and others,[16] are unlikely to be happening. Conversely, a third  
41 of new implant components have not yet accrued more than ten uses. Postmarket surveillance of THRs,  
42 due to their longevity, performs a safety monitoring role which cannot easily be replaced by pre-  
43 approval clinical data. Since the statistical methods are not applicable to components used in small  
44 numbers collaboration between international arthroplasty registries may allow more effective  
45 monitoring for low-volume components.  
46  
47  
48  
49  
50  
51  
52

53  
54 Over half of surgeons in our study used  $\leq 5$  different stems, cups, or combinations, similar to a median of  
55 two different implant brands reported by surgeons in the USA in 1997.[17] The volume of THRs  
56  
57

1  
2  
3 performed by surgeons using new components was often low (median  $\leq 4$  THRs with new components  
4 versus median 22 THRs in total), but the proportion of their THRs using any new components varied  
5 from one percent (lower quartile) to 27% (upper quartile). Surgeons who use a wider range of prosthesis  
6 combinations in THRs may have higher revision rates [18] and early THRs performed after switching  
7 implants may have a higher revision risk (a.k.a. 'learning-curve').[19] While this suggests that surgeons  
8 should rely on a narrow range of implant components and rarely switch, a phased introduction of new  
9 implant designs, as is done in Sweden, may mitigate the learning-curve effect.[20] Since there are no  
10 contemporary comparisons of the range of implant components surgeons use and their relative  
11 volumes, it is unclear whether the between-surgeon variation we have reported may be associated with  
12 worse implant survival and warrants further research.

13  
14  
15 We found that newer components were being used in patients likely to be more active (i.e. younger  
16 and/or male patients). There has been increasing evidence that uncemented implants, particularly  
17 stems, should not be used in older patients, but some uncertainty remains about their use in young  
18 patients (especially uncemented cups).[21–23] Since the majority of new cups and stems are  
19 uncemented, the decision to use these implant components in younger patients may increase the  
20 already high lifetime risk of revision surgery for these patients. Associations between BMI or ASA grade  
21 and receipt or use of new components were inconsistent between stems and cups and did not provide  
22 clear support for the use of new implant components in patients likely to be more active (i.e. lower BMI  
23 and ASA grades). It may be of interest to further investigate the implant component choices made for  
24 patients with higher BMI or ASA grades.

25  
26  
27 The most comparable previous work used NJR data to explore patient-level and hospital-level  
28 determinants that patients receive uncemented versus cemented implants.[13] Uncemented  
29 components were less likely to be used in women and older patients, and hospitals treating older  
30 patients were less likely to use them. Our results indicate that surgeons who treat a higher proportion of  
31 younger patients are more likely to use newer components. Our most marked finding, that surgeons  
32 who used a wide variety of stem-cup combinations (either established or new) were much more likely to  
33 try a new component, may be somewhat self-evident but suggests that there may be a subset of  
34 surgeons who change components more quickly than their peers. Whether this behaviour, alongside the  
35 previously discussed learning-curve, is related to outcomes of THRs is currently unclear.

## Conclusions

A large number of new THR implant components have been introduced into use in the NJR since 2008. The majority of THRs performed since 2008 used components which have been in use for a long time, but a large number of surgeons have tried new components, with wide variation in how many types and how often they have been used. The impact of this variation on patient outcomes is currently unclear. New rather than established implant components are more likely to be used in patients who are younger and/or male, although whether this will reduce the high lifetime risk of revision for this population is unclear.

## References

- 1 Dreinhöfer KE, Dieppe P, Stürmer T, *et al*. Indications for total hip replacement: Comparison of assessments of orthopaedic surgeons and referring physicians. *Annals of the Rheumatic Diseases* 2006;**65**:1346–50. doi:10.1136/ard.2005.047811
- 2 National Joint Registry for England, Wales and Northern Ireland. 14th Annual Report 2017. 2017.
- 3 National Institute for Health and Care Excellence. Total hip replacement and resurfacing arthroplasty for end-stage arthritis of the hip. NICE 2018.
- 4 Bayliss LE, Culliford D, Monk AP, *et al*. The effect of patient age at intervention on risk of implant revision after total replacement of the hip or knee: a population-based cohort study. *The Lancet* 2017;**389**:1424–30. doi:10.1016/S0140-6736(17)30059-4
- 5 Smith AJ, Dieppe P, Vernon K, *et al*. Failure rates of stemmed metal-on-metal hip replacements: Analysis of data from the National Joint Registry of England and Wales. *The Lancet* 2012;**379**:1199–204. doi:10.1016/S0140-6736(12)60353-5
- 6 de Steiger RN, Hang JR, Miller LN, *et al*. Five-Year Results of the ASR XL Acetabular System and the ASR Hip Resurfacing System. *The Journal of Bone and Joint Surgery-American Volume* 2011;**93**:2287–93. doi:10.2106/JBJS.J.01727
- 7 Reito A, Lehtovirta L, Lainiala O, *et al*. Lack of evidence—the anti-stepwise introduction of metal-on-metal hip replacements. *Acta Orthopaedica* 2017;**88**:478–83. doi:10.1080/17453674.2017.1353794
- 8 Kynaston-Pearson F, Ashmore AM, Malak TT, *et al*. Primary hip replacement prostheses and their evidence base: systematic review of literature. *BMJ* 2013;**347**:f6956. doi:10.1136/bmj.f6956
- 9 López-López JA, Humphriss RL, Beswick AD, *et al*. Choice of implant combinations in total hip replacement: systematic review and network meta-analysis. *BMJ (Clinical research ed)* 2017;**359**:j4651. doi:10.1136/bmj.j4651



- 1  
2  
3 10 McCulloch P, Altman DG, Campbell WB, *et al.* No surgical innovation without evaluation: the IDEAL  
4 recommendations. *The Lancet* 2009;**374**:1105–12. doi:10.1016/S0140-6736(09)61116-8  
5  
6  
7 11 Birkmeyer JD, Reames BN, McCulloch P, *et al.* Understanding of regional variation in the use of  
8 surgery. *The Lancet* 2013;**382**:1121–9. doi:10.1016/S0140-6736(13)61215-5  
9  
10 12 National Joint Registry for England W and NI. Prostheses used in hip, knee, ankle, elbow and  
11 shoulder replacement procedures 2016. 2017.  
12  
13 13 Davies C. *An analysis of choice: a case study on hip prostheses.* 2011.  
14  
15 14 Anand R, Graves SE, de Steiger RN, *et al.* What Is the Benefit of Introducing New Hip and Knee  
16 Prostheses? *The Journal of Bone and Joint Surgery-American Volume* 2011;**93**:51–4.  
17 doi:10.2106/JBJS.K.00867  
18  
19 15 Peltola M. *Impact of technological change on quality of care: Studies on total hip and knee*  
20 *replacement.* 2016.  
21  
22 16 Zywił MG, Johnson AJ, Mont MA. Graduated Introduction of Orthopaedic Implants. *The Journal of*  
23 *Bone & Joint Surgery* 2012;**94**:e158. doi:10.2106/JBJS.K.01675  
24  
25 17 Sharkey PF, Sethuraman V, Hozack WJ, *et al.* Factors influencing choice of implants in total hip  
26 arthroplasty and total knee arthroplasty: Perspectives of surgeons and patients. *Journal of*  
27 *Arthroplasty* 1999;**14**:281–7. doi:10.1016/S0883-5403(99)90052-9  
28  
29  
30 18 Australian Orthopaedic Association. Hip, Knee & Shoulder Arthroplasty: Annual Report 2017.  
31 Australian Orthopaedic Association 2017.  
32 [https://aoanjrr.sahmri.com/documents/10180/397736/Hip%2C%20Knee%20%26%20Shoulder%20](https://aoanjrr.sahmri.com/documents/10180/397736/Hip%2C%20Knee%20%26%20Shoulder%20Arthroplasty)  
33 [Arthroplasty](https://aoanjrr.sahmri.com/documents/10180/397736/Hip%2C%20Knee%20%26%20Shoulder%20Arthroplasty)  
34  
35 19 Peltola M, Malmivaara A, Paavola M. Hip prosthesis introduction and early revision risk. *Acta*  
36 *Orthopaedica* 2013;**84**:25–31. doi:10.3109/17453674.2013.771299  
37  
38 20 Mohaddes M, Björk M, Nemes S, *et al.* No increased risk of early revision during the implementation  
39 phase of new cup designs: Analysis of 52,903 hip arthroplasties reported to the Swedish Hip  
40 Arthroplasty Register. *Acta Orthopaedica* 2016;**87**:31–6. doi:10.1080/17453674.2016.1181818  
41  
42 21 Mäkelä KT, Matilainen M, Pulkkinen P, *et al.* Failure rate of cemented and uncemented total hip  
43 replacements: Register study of combined Nordic database of four nations. *BMJ (Online)*  
44 2014;**348**:1–10. doi:10.1136/bmj.f7592  
45  
46 22 Stea S, Comfort T, Sedrakyan A, *et al.* Multinational comprehensive evaluation of the fixation  
47 method used in hip replacement: Interaction with age in context. *Journal of Bone and Joint Surgery -*  
48 *American Volume* 2014;**96**:42–51. doi:10.2106/JBJS.N.00463  
49  
50 23 Hailer NP, Garellick G, Kärrholm J. Uncemented and cemented primary total hip arthroplasty in the  
51 Swedish Hip Arthroplasty Register: Evaluation of 170,413 operations. *Acta Orthopaedica*  
52 2010;**81**:34–41. doi:10.3109/17453671003685400  
53  
54  
55  
56  
57  
58  
59  
60

1  
2  
3  
4  
5  
6  
7  
8  
9  
10  
11  
12  
13  
14  
15  
16  
17  
18  
19  
20  
21  
22  
23  
24  
25  
26  
27  
28  
29  
30  
31  
32  
33  
34  
35  
36  
37  
38  
39  
40  
41  
42  
43  
44  
45  
46  
47  
48  
49  
50  
51  
52  
53  
54  
55  
56  
57  
58  
59  
60

For peer review only

Table 1 Results from multivariable adjusted logistic regression models showing the association between surgeon-level factors and use of new stems and cups

| Exposure                                                                                   | Stems                                  |                               |                 |                |                | Cups                                   |                               |                 |                |                |
|--------------------------------------------------------------------------------------------|----------------------------------------|-------------------------------|-----------------|----------------|----------------|----------------------------------------|-------------------------------|-----------------|----------------|----------------|
|                                                                                            | Established<br>(n=17,753) <sup>3</sup> | New<br>(n=2,657) <sup>3</sup> | OR <sup>1</sup> | (95% CI)       | p <sup>1</sup> | Established<br>(n=15,891) <sup>3</sup> | New<br>(n=4,519) <sup>3</sup> | OR <sup>1</sup> | (95% CI)       | p <sup>1</sup> |
| <b>Proportion of THRs performed on patients &lt;55 years old</b>                           |                                        |                               |                 |                |                |                                        |                               |                 |                |                |
| <10% (ref.)                                                                                | 12,734<br>(71.7%)                      | 1,294<br>(48.7%)              | 1               | -              | -              | 11,629<br>(73.2%)                      | 2,399<br>(53.1%)              | 1               | -              | -              |
| ≥10%                                                                                       | 5,019<br>(28.3%)                       | 1,363<br>(51.3%)              | 1.51            | (1.34 to 1.69) | <0.001         | 4,262<br>(26.8%)                       | 2,120<br>(46.9%)              | 1.45            | (1.32 to 1.59) | <0.001         |
| <b>Number of THRs performed in calendar year<sup>2</sup><br/>(per 10 additional cases)</b> |                                        |                               | 1.02            | (1.00 to 1.05) | 0.03           |                                        |                               | 1.08            | (1.05 to 1.10) | <0.001         |
|                                                                                            | 7.0<br>(2.0, 23.0)                     | 28.0<br>(9.0, 58.0)           |                 |                |                | 6.0<br>(2.0, 20.0)                     | 24.0<br>(8.0, 54.0)           |                 |                |                |
| <b>Proportion of THRs funded privately</b>                                                 |                                        |                               |                 |                |                |                                        |                               |                 |                |                |
| 100% NHS funded (ref.)                                                                     | 12,551<br>(70.7%)                      | 1,337<br>(50.3%)              | 1               | -              | -              | 11,420<br>(71.9%)                      | 2,468<br>(54.6%)              | 1               | -              | -              |
| Some or all funded privately                                                               | 5,202<br>(29.3%)                       | 1,320<br>(49.7%)              | 1.23            | (1.06 to 1.42) | 0.006          | 4,471<br>(28.1%)                       | 2,051<br>(45.4%)              | 1.11            | (0.98 to 1.25) | 0.10           |
| <b>Number of stem-cup combinations used in calendar year</b>                               |                                        |                               |                 |                |                |                                        |                               |                 |                |                |
| ≤3 (ref.)                                                                                  | 13,915<br>(78.4%)                      | 933<br>(35.1%)                | 1               | -              | -              | 12,922<br>(81.3%)                      | 1,926<br>(42.6%)              | 1               | -              | -              |
| 4-6                                                                                        | 3,184<br>(17.9%)                       | 1,032<br>(38.8%)              | 3.97            | (3.51 to 4.50) | <0.001         | 2,514<br>(15.8%)                       | 1,702<br>(37.7%)              | 3.47            | (3.12 to 3.85) | <0.001         |
| 7-10                                                                                       | 595<br>(3.4%)                          | 548<br>(20.6%)                | 9.84            | (8.11 to 12.0) | <0.001         | 416<br>(2.6%)                          | 727<br>(16.1%)                | 7.12            | (5.90 to 8.61) | <0.001         |
| >10                                                                                        | 59<br>(0.3%)                           | 144<br>(5.4%)                 | 23.3            | (15.3 to 35.6) | <0.001         | 39<br>(0.2%)                           | 164<br>(3.6%)                 | 13.9            | (9.00 to 21.5) | <0.001         |

| Proportion of THRs performed on patients with ASA grade III-V |                   |                  |      |                |      |                   |                  |      |                |        |
|---------------------------------------------------------------|-------------------|------------------|------|----------------|------|-------------------|------------------|------|----------------|--------|
| <25% (ref.)                                                   | 12,779<br>(72.0%) | 2,019<br>(76.0%) | 1    | -              | -    | 11,464<br>(72.1%) | 3,334<br>(73.8%) | 1    | -              | -      |
| ≥25%                                                          | 4974<br>(28.0%)   | 638<br>(24.0%)   | 1.09 | (0.97 to 1.23) | 0.16 | 4,427<br>(27.9%)  | 1,185<br>(26.2%) | 1.23 | (1.12 to 1.35) | <0.001 |

1 – odds ratios, 95% confidence intervals and p-values are from logistic regression models adjusted for all exposure variables, 2 - median (lower to upper quartile), 3 - proportions displayed are based on surgeon-calendar years

Table 2 Results from multivariable adjusted mixed-effects regression models (patients nested within surgeons) of age, gender, categorised BMI, ASA grade and source of funding on stem age and cup age, with category proportions

|                               | Stems                      |                   |                 |                |        | Cups                       |                   |                 |                |        |
|-------------------------------|----------------------------|-------------------|-----------------|----------------|--------|----------------------------|-------------------|-----------------|----------------|--------|
|                               | Established<br>(n=410,613) | New<br>(n=21,342) | OR <sup>1</sup> | (95% CI)       | p      | Established<br>(n=391,369) | New<br>(n=40,586) | OR <sup>1</sup> | (95% CI)       | p      |
| <b>Age</b>                    |                            |                   |                 |                |        |                            |                   |                 |                |        |
| <55 years old                 | 42,078<br>(10.2%)          | 4,495<br>(21.1%)  | 2.13            | (2.04 to 2.23) | <0.001 | 40,637<br>(10.4%)          | 5,936<br>(14.6%)  | 1.40            | (1.34 to 1.45) | <0.001 |
| 55 to 80 (ref.)               | 306,218<br>(74.6%)         | 15,233<br>(71.4%) | 1               | -              | -      | 292,278<br>(74.7%)         | 29,173<br>(71.9%) | 1               | -              | -      |
| ≥ 80 years old                | 62,317<br>(15.2%)          | 1,614<br>(7.6%)   | 0.49            | (0.46 to 0.52) | <0.001 | 58,454<br>(14.9%)          | 5,477<br>(13.5%)  | 0.90            | (0.87 to 0.94) | <0.001 |
| <b>Gender</b>                 |                            |                   |                 |                |        |                            |                   |                 |                |        |
| Male (ref.)                   | 161,920<br>(39.4%)         | 9,455<br>(44.3%)  | 1               | -              | -      | 155,709<br>(39.8%)         | 15,666<br>(38.6%) | 1               | -              | -      |
| Female                        | 248,693<br>(60.6%)         | 11,887<br>(55.7%) | 0.81            | (0.78 to 0.84) | <0.001 | 235,660<br>(60.2%)         | 24,920<br>(61.4%) | 1.11            | (1.08 to 1.14) | <0.001 |
| <b>BMI</b>                    |                            |                   |                 |                |        |                            |                   |                 |                |        |
| Underweight and normal (ref.) | 93,578<br>(22.8%)          | 4,639<br>(21.7%)  | 1               | -              | -      | 88,450<br>(22.6%)          | 9,767<br>(24.1%)  | 1               | -              | -      |
| Overweight                    | 162,562<br>(39.6%)         | 8,425<br>(39.5%)  | 1.04            | (1.00 to 1.09) | 0.06   | 155,070<br>(39.6%)         | 15,917<br>(39.2%) | 0.97            | (0.94 to 1.01) | 0.11   |
| Class I Obese                 | 103,566<br>(25.2%)         | 5,495<br>(25.7%)  | 1.07            | (1.02 to 1.12) | 0.006  | 99,110<br>(25.3%)          | 9,951<br>(24.5%)  | 0.97            | (0.93 to 1.00) | 0.07   |
| Class II Obese                | 38,175<br>(9.3%)           | 2,096<br>(9.8%)   | 1.14            | (1.07 to 1.22) | <0.001 | 36,611<br>(9.4%)           | 3,660<br>(9.0%)   | 0.97            | (0.93 to 1.02) | 0.29   |
| Class III Obese               | 12,732<br>(3.1%)           | 687<br>(3.2%)     | 1.07            | (0.97 to 1.19) | 0.17   | 12,128<br>(3.1%)           | 1,291<br>(3.2%)   | 1.01            | (0.94 to 1.09) | 0.70   |
| <b>ASA grade</b>              |                            |                   |                 |                |        |                            |                   |                 |                |        |
| I (ref.)                      | 58,391<br>(14.2%)          | 4,292<br>(20.1%)  | 1               | -              | -      | 55,989<br>(14.3%)          | 6,694<br>(16.5%)  | 1               | -              | -      |
| II                            | 287,661<br>(70.1%)         | 14,421<br>(67.6%) | 0.79            | (0.75 to 0.82) | <0.001 | 274,383<br>(70.1%)         | 27,699<br>(68.2%) | 1.03            | (0.99 to 1.06) | 0.16   |
| III                           | 62,821<br>(15.3%)          | 2,565<br>(12.0%)  | 0.64            | (0.60 to 0.69) | <0.001 | 59,394<br>(15.2%)          | 5,992<br>(14.8%)  | 1.08            | (1.02 to 1.13) | 0.003  |
| IV + V                        | 1,740<br>(0.4%)            | 64<br>(0.3%)      | 0.60            | (0.45 to 0.80) | 0.001  | 1,603<br>(0.4%)            | 201<br>(0.5%)     | 1.26            | (1.06 to 1.51) | 0.01   |

| Source of funding |                    |                   |      |                |      |                    |                   |      |                |        |
|-------------------|--------------------|-------------------|------|----------------|------|--------------------|-------------------|------|----------------|--------|
| NHS               | 358,057<br>(87.2%) | 17,424<br>(81.6%) | 1    | -              | -    | 342,458<br>(87.5%) | 33,023<br>(81.4%) | 1    | -              | -      |
| Private           | 52,556<br>(12.8%)  | 3,918<br>(18.4%)  | 0.94 | (0.89 to 0.99) | 0.02 | 48,911<br>(12.5%)  | 7,563<br>(18.6%)  | 1.13 | (1.08 to 1.18) | <0.001 |

1 – odds ratios, 95% confidence intervals and p-values are from mixed-effects logistic regression models adjusted for all exposure variables

For peer review only

1  
2  
3  
4  
5  
6  
7  
8  
9  
10  
11  
12  
13  
14  
15  
16  
17  
18  
19  
20  
21  
22  
23  
24  
25  
26  
27  
28  
29  
30  
31  
32  
33  
34  
35  
36  
37  
38  
39  
40  
41  
42  
43  
44  
45  
46  
47

*Figure 1 Proportion of total hip replacements between January 2008 and February 2017 using stem or cups/shells introduced in different time periods (before 2004, 2004-2006, 2006-2008, 2008 onwards)*

For peer review only

1  
2  
3  
4  
5 *Figure 2 Cumulative total use of the top 5 new stems and cups/shells by days since they were introduced*  
6  
7  
8  
9  
10  
11  
12  
13  
14  
15  
16  
17  
18  
19  
20  
21  
22  
23  
24  
25  
26  
27  
28  
29  
30  
31  
32  
33  
34  
35  
36  
37  
38  
39  
40  
41  
42  
43  
44  
45  
46  
47

For peer review only



1  
2  
3  
4  
5  
6  
7  
8  
9  
10  
11  
12  
13  
14  
15  
16  
17  
18  
19  
20  
21  
22  
23  
24  
25  
26  
27  
28  
29  
30  
31  
32  
33  
34  
35  
36  
37  
38  
39  
40  
41  
42  
43  
44  
45  
46  
47  
48  
49  
50  
51  
52  
53  
54  
55  
56  
57  
58  
59  
60

For peer review only

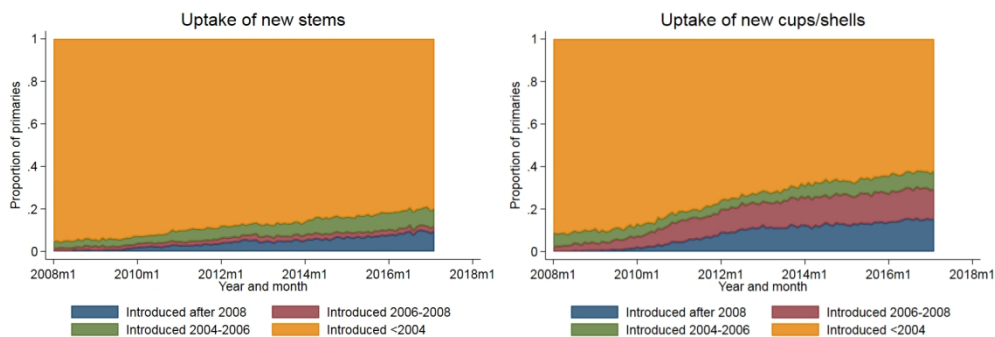

Figure 1 Proportion of total hip replacements between January 2008 and February 2017 using stem or cups/shells introduced in different time periods (before 2004, 2004-2006, 2006-2008, 2008 onwards)

640x232mm (72 x 72 DPI)

1  
2  
3  
4  
5  
6  
7  
8  
9  
10  
11  
12  
13  
14  
15  
16  
17  
18  
19  
20  
21  
22  
23  
24  
25  
26  
27  
28  
29  
30  
31  
32  
33  
34  
35  
36  
37  
38  
39  
40  
41  
42  
43  
44  
45  
46  
47  
48  
49  
50  
51  
52  
53  
54  
55  
56  
57  
58  
59  
60

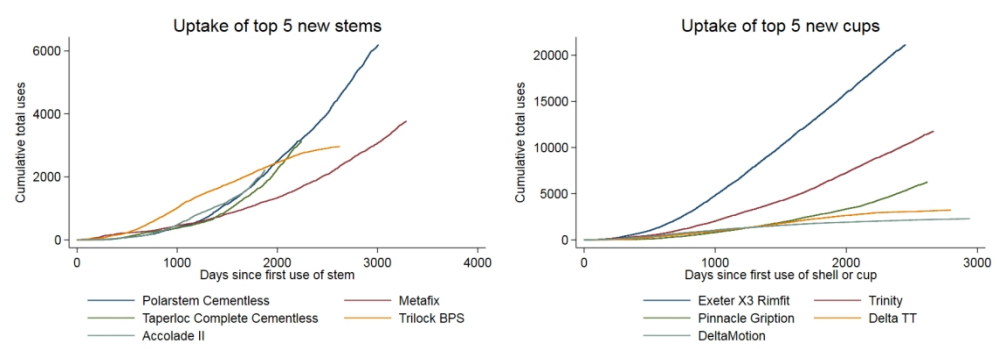

Figure 2 Cumulative total use of the top 5 new stems and cups/shells by days since they were introduced  
640x232mm (72 x 72 DPI)

1  
2  
3  
4  
5  
6  
7  
8  
9  
10  
11  
12  
13  
14  
15  
16  
17  
18  
19  
20  
21  
22  
23  
24  
25  
26  
27  
28  
29  
30  
31  
32  
33  
34  
35  
36  
37  
38  
39  
40  
41  
42  
43  
44  
45  
46  
47  
48  
49  
50  
51  
52  
53  
54  
55  
56  
57  
58  
59  
60

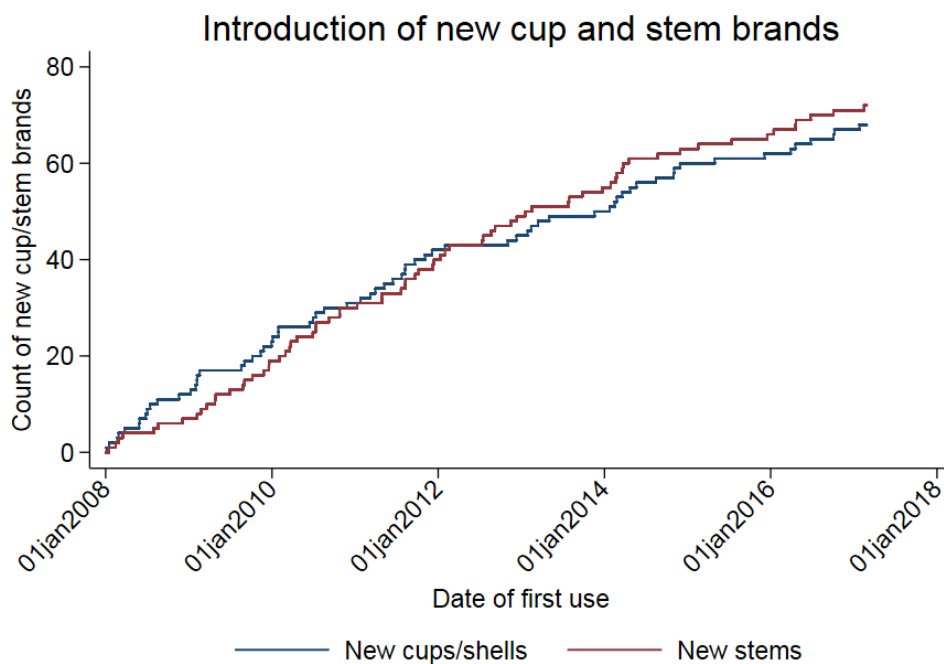

Figure S1 The cumulative introduction of new brands of cup and stem components for THRs, between January 1st 2008 and 26th February 2017

319x232mm (72 x 72 DPI)

1  
2  
3  
4  
5  
6  
7  
8  
9  
10  
11  
12  
13  
14  
15  
16  
17  
18  
19  
20  
21  
22  
23  
24  
25  
26  
27  
28  
29  
30  
31  
32  
33  
34  
35  
36  
37  
38  
39  
40  
41  
42  
43  
44  
45  
46  
47  
48  
49  
50  
51  
52  
53  
54  
55  
56  
57  
58  
59  
60

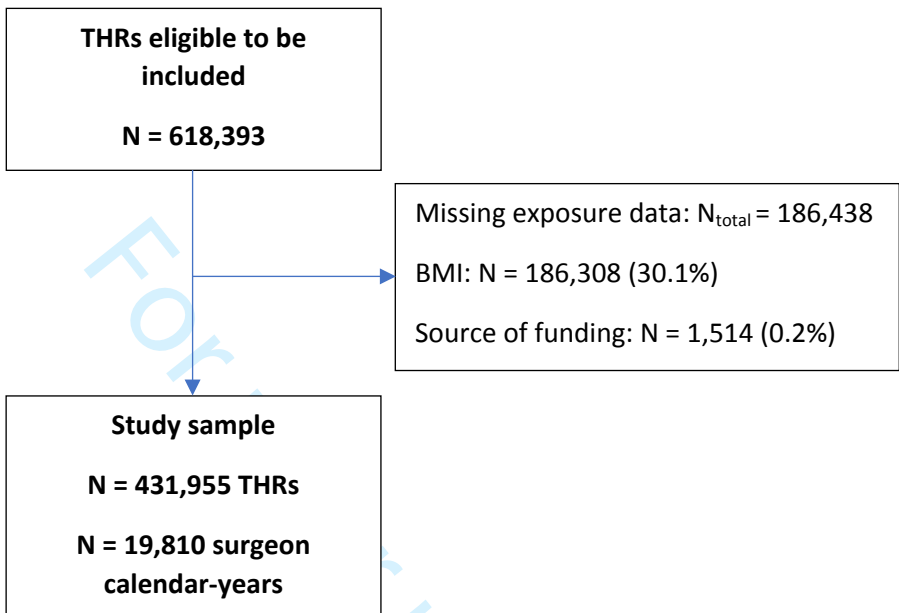

## Supplementary material

Table S1 Uptake of new cups first used between January 1<sup>st</sup> 2008 and 26<sup>th</sup> February 2017

| Cup/shell brand                    | UC <sub>1</sub> | Patients | Percent | Surgeons | Month first used | Month last used |
|------------------------------------|-----------------|----------|---------|----------|------------------|-----------------|
| Exeter X3 Rimfit                   |                 | 21,116   | 38.1%   | 975      | Jun 2010         | Feb 2017        |
| Trinity                            | ✓               | 11,752   | 21.2%   | 310      | Nov 2009         | Feb 2017        |
| Pinnacle Gription                  | ✓               | 6,250    | 11.3%   | 599      | Dec 2009         | Feb 2017        |
| Delta TT                           | ✓               | 3,215    | 5.8%    | 193      | Jun 2009         | Feb 2017        |
| DeltaMotion                        | ✓               | 2,300    | 4.2%    | 172      | Feb 2009         | Feb 2017        |
| Versafit CC Trio                   | ✓               | 1,713    | 3.1%    | 50       | Mar 2011         | Feb 2017        |
| RM Pressfit Vitamys                | ✓               | 872      | 1.6%    | 37       | Aug 2011         | Feb 2017        |
| Exceed ABT Cemented                |                 | 865      | 1.6%    | 67       | Jun 2011         | Feb 2017        |
| RM Pressfit                        | ✓               | 686      | 1.2%    | 50       | May 2008         | Feb 2017        |
| G7 Cementless Acetabular Component | ✓               | 621      | 1.1%    | 36       | Aug 2014         | Feb 2017        |
| AEON Cemented Acetabular Cup       |                 | 614      | 1.1%    | 46       | Sep 2011         | Feb 2017        |
| Plasmafit Cementless Cup           | ✓               | 546      | 1.0%    | 50       | Nov 2012         | Feb 2017        |
| Allofit IT                         | ✓               | 491      | 0.9%    | 21       | Jan 2010         | Jan 2017        |
| Duracel                            |                 | 465      | 0.8%    | 45       | Mar 2013         | Feb 2017        |
| ADES Cemented                      |                 | 342      | 0.6%    | 72       | Feb 2014         | Feb 2017        |
| Regenerex Ringloc+                 | ✓               | 323      | 0.6%    | 70       | Feb 2009         | Feb 2017        |
| XLFit Acetabular Cup               | ✓               | 293      | 0.5%    | 56       | Apr 2015         | Feb 2017        |
| April - Polyethylene               | ✓               | 220      | 0.4%    | 33       | Jan 2012         | Feb 2017        |
| ADES                               | ✓               | 205      | 0.4%    | 39       | May 2014         | Feb 2017        |
| Delta One TT                       | ✓               | 202      | 0.4%    | 82       | Jun 2010         | Feb 2017        |
| Trident Constrained Cup            |                 | 199      | 0.4%    | 84       | Jan 2008         | Feb 2017        |
| Delta PF                           | ✓               | 198      | 0.4%    | 9        | Mar 2011         | Nov 2014        |
| MIHR Cup                           | ✓               | 197      | 0.4%    | 12       | Mar 2008         | Aug 2011        |
| Tribofit                           | ✓               | 184      | 0.3%    | 10       | Jul 2010         | Nov 2016        |
| seleXys TH+                        | ✓               | 174      | 0.3%    | 13       | Nov 2008         | Apr 2011        |
| OptiCup CEP                        |                 | 147      | 0.3%    | 18       | Nov 2014         | Feb 2017        |
| Restoration ADM Cup                | ✓               | 140      | 0.3%    | 32       | May 2011         | Feb 2017        |
| Gyros                              | ✓               | 129      | 0.2%    | 28       | Jan 2010         | Dec 2013        |
| Allofit-S IT                       | ✓               | 126      | 0.2%    | 22       | Aug 2010         | Jun 2016        |
| EcoFit Cementless Cup              | ✓               | 102      | 0.2%    | 5        | Feb 2013         | Mar 2015        |
| Novation                           | ✓               | 93       | 0.2%    | 10       | Nov 2009         | Aug 2014        |
| M2A Magnum                         | ✓               | 79       | 0.1%    | 30       | Feb 2008         | Jun 2010        |
| Captiv DM                          | ✓               | 78       | 0.1%    | 9        | Aug 2011         | Feb 2017        |
| Freedom                            |                 | 78       | 0.1%    | 17       | May 2008         | Nov 2014        |
| seleXys DS Cementless              | ✓               | 56       | 0.1%    | 16       | Mar 2014         | Dec 2016        |

|    |                        |   |               |      |    |          |          |
|----|------------------------|---|---------------|------|----|----------|----------|
| 1  | Restoration Gap2       |   | 36            | 0.1% | 24 | Mar 2008 | Dec 2016 |
| 2  |                        |   |               |      |    |          |          |
| 3  | MMC Resurfacing        | ✓ | 36            | 0.1% | 10 | Aug 2009 | Jan 2011 |
| 4  | ASR 300 Cup            | ✓ | 36            | 0.1% | 1  | Jan 2009 | Jan 2010 |
| 5  | MPACT                  | ✓ | 30            | 0.1% | 9  | Dec 2011 | Feb 2017 |
| 6  |                        |   |               |      |    |          |          |
| 7  | seleXys DS Cemented    |   | 20            | 0.0% | 12 | Feb 2014 | Apr 2015 |
| 8  | Fixa Ti-Por            | ✓ | 20            | 0.0% | 4  | Apr 2014 | Oct 2016 |
| 9  | Fixa Duplex            | ✓ | 17            | 0.0% | 1  | Mar 2016 | Feb 2017 |
| 10 | Cormet Prime           | ✓ | 12            | 0.0% | 5  | Jan 2010 | Sep 2011 |
| 11 | Delta Revision TT      | ✓ | 12            | 0.0% | 8  | Nov 2010 | Aug 2016 |
| 12 | A Class                |   | 9             | 0.0% | 4  | Feb 2009 | Feb 2017 |
| 13 | Equateur               | ✓ | 9             | 0.0% | 5  | Jul 2008 | Nov 2008 |
| 14 | U-Motion II            | ✓ | 8             | 0.0% | 4  | Apr 2016 | Feb 2017 |
| 15 | Zimmer Cemented Cup    |   | 6             | 0.0% | 4  | May 2013 | Sep 2016 |
| 16 | Regenerex Revision     | ✓ | 4             | 0.0% | 3  | Jan 2009 | Jan 2012 |
| 17 | Par-5                  | ✓ | 3             | 0.0% | 3  | Jan 2008 | Mar 2010 |
| 18 | Horizon                | ✓ | 3             | 0.0% | 2  | Jul 2008 | Jul 2008 |
| 19 | 2M Dual Mobility       | ✓ | 3             | 0.0% | 2  | Nov 2012 | Sep 2014 |
| 20 | Capitole C             |   | 3             | 0.0% | 3  | Jan 2013 | Jul 2015 |
| 21 | Sirius Cementless Cup  | ✓ | 3             | 0.0% | 2  | Aug 2011 | Nov 2011 |
| 22 | XPE Cup                |   | 2             | 0.0% | 1  | Jun 2016 | Oct 2016 |
| 23 | Solution Cemented Cup  |   | 2             | 0.0% | 1  | Dec 2015 | Feb 2016 |
| 24 | J-Loc                  | ✓ | 2             | 0.0% | 2  | Mar 2013 | Aug 2013 |
| 25 | Evidence               |   | 2             | 0.0% | 1  | Oct 2014 | Mar 2015 |
| 26 | Versafit DM            | ✓ | 2             | 0.0% | 2  | May 2008 | Feb 2016 |
| 27 | Polymax                | ✓ | 1             | 0.0% | 1  | Oct 2016 | Oct 2016 |
| 28 | Versacem               |   | 1             | 0.0% | 1  | Oct 2009 | Oct 2009 |
| 29 | Arden                  |   | 1             | 0.0% | 1  | Feb 2008 | Feb 2008 |
| 30 | FIXA Duplex Cemented   |   | 1             | 0.0% | 1  | Jan 2017 | Jan 2017 |
| 31 | Endurance Cemented Cup |   | 1             | 0.0% | 1  | Oct 2016 | Oct 2016 |
| 32 | Charnley KS            |   | 1             | 0.0% | 1  | Jul 2011 | Jul 2011 |
| 33 | Ringloc                | ✓ | 1             | 0.0% | 1  | Jan 2011 | Jan 2011 |
| 34 | Mitre Cup              |   | 1             | 0.0% | 1  | Nov 2013 | Nov 2013 |
| 35 | Capitole T             | ✓ | 1             | 0.0% | 1  | Nov 2014 | Nov 2014 |
| 36 |                        |   |               |      |    |          |          |
| 37 |                        |   |               |      |    |          |          |
| 38 |                        |   |               |      |    |          |          |
| 39 |                        |   |               |      |    |          |          |
| 40 |                        |   |               |      |    |          |          |
| 41 |                        |   |               |      |    |          |          |
| 42 |                        |   |               |      |    |          |          |
| 43 |                        |   |               |      |    |          |          |
| 44 |                        |   |               |      |    |          |          |
| 45 |                        |   |               |      |    |          |          |
| 46 |                        |   |               |      |    |          |          |
| 47 | <b>Total</b>           |   | <b>55,360</b> |      |    |          |          |
| 48 |                        |   |               |      |    |          |          |
| 49 |                        |   |               |      |    |          |          |
| 50 |                        |   |               |      |    |          |          |
| 51 |                        |   |               |      |    |          |          |
| 52 |                        |   |               |      |    |          |          |
| 53 |                        |   |               |      |    |          |          |
| 54 |                        |   |               |      |    |          |          |
| 55 |                        |   |               |      |    |          |          |
| 56 |                        |   |               |      |    |          |          |
| 57 |                        |   |               |      |    |          |          |
| 58 |                        |   |               |      |    |          |          |
| 59 |                        |   |               |      |    |          |          |
| 60 |                        |   |               |      |    |          |          |

1 – Uncemented fixation, Rows in **bold** = five most commonly used new cups

Table S2 Uptake of new stems first used between January 1<sup>st</sup> 2008 and 26<sup>th</sup> February 2017

| Stem brand                               | UC <sup>1</sup> | Patients     | Percent      | Surgeons   | Month first used | Month last used |
|------------------------------------------|-----------------|--------------|--------------|------------|------------------|-----------------|
| <b>Polarstem Cementless</b>              | ✓               | <b>6,191</b> | <b>21.4%</b> | <b>196</b> | <b>Dec 2008</b>  | <b>Feb 2017</b> |
| <b>Metafix Stem</b>                      | ✓               | <b>3,766</b> | <b>13.0%</b> | <b>166</b> | <b>Feb 2008</b>  | <b>Feb 2017</b> |
| <b>Taperloc Complete Cementless Stem</b> | ✓               | <b>3,120</b> | <b>10.8%</b> | <b>151</b> | <b>Jan 2011</b>  | <b>Feb 2017</b> |
| <b>Trilock BPS</b>                       | ✓               | <b>2,966</b> | <b>10.3%</b> | <b>142</b> | <b>Dec 2009</b>  | <b>Feb 2017</b> |
| <b>Accolade II</b>                       | ✓               | <b>2,215</b> | <b>7.7%</b>  | <b>180</b> | <b>Jan 2012</b>  | <b>Feb 2017</b> |
| miniHip                                  | ✓               | 1,860        | 6.4%         | 101        | Mar 2009         | Feb 2017        |
| AMiStem-H                                | ✓               | 1,223        | 4.2%         | 38         | Aug 2009         | Jan 2017        |
| Exeter No.1 125mm stem Line Extension    |                 | 836          | 2.9%         | 211        | Aug 2014         | Feb 2017        |
| Aeon Cemented Stem                       |                 | 724          | 2.5%         | 54         | Sep 2011         | Feb 2017        |
| TriFit TS hip stem                       | ✓               | 684          | 2.4%         | 44         | Sep 2012         | Feb 2017        |
| SPS Evolution                            | ✓               | 670          | 2.3%         | 48         | Jan 2012         | Feb 2017        |
| Corail Cemented                          |                 | 531          | 1.8%         | 52         | Apr 2009         | Feb 2017        |
| C-Stem AMT Line Extension                |                 | 428          | 1.5%         | 127        | Jul 2013         | Feb 2017        |
| H-Max S Monoblock Stem                   | ✓               | 419          | 1.4%         | 36         | May 2010         | Dec 2016        |
| EcoFit Cementless Stem                   | ✓               | 319          | 1.1%         | 15         | Sep 2010         | Jan 2017        |
| H-Max M Modular Stem                     | ✓               | 316          | 1.1%         | 20         | Mar 2010         | Aug 2014        |
| Finsbury Type C                          | ✓               | 302          | 1.0%         | 39         | Aug 2008         | Sep 2010        |
| Silent                                   | ✓               | 218          | 0.8%         | 21         | Feb 2008         | Feb 2014        |
| Metha Monoblock Stem                     | ✓               | 212          | 0.7%         | 26         | Aug 2011         | Feb 2017        |
| Trilliance                               |                 | 178          | 0.6%         | 11         | Jul 2011         | Jan 2017        |
| OptiStem                                 |                 | 165          | 0.6%         | 22         | Nov 2014         | Feb 2017        |
| Sirius stem                              |                 | 138          | 0.5%         | 10         | Apr 2014         | Feb 2017        |
| Corail Revision Stem                     | ✓               | 133          | 0.5%         | 89         | Jul 2010         | Feb 2017        |
| Profemur L Classic                       | ✓               | 132          | 0.5%         | 17         | Mar 2014         | Feb 2017        |
| Profemur TL                              | ✓               | 121          | 0.4%         | 23         | Jan 2008         | Jul 2014        |
| AMiStem-C                                |                 | 110          | 0.4%         | 3          | Jul 2012         | Feb 2017        |
| Master SL                                | ✓               | 102          | 0.4%         | 8          | Jul 2013         | Feb 2017        |
| Novation Element Stem                    | ✓               | 90           | 0.3%         | 9          | Nov 2009         | Jul 2014        |
| CBC Evolution                            | ✓               | 83           | 0.3%         | 8          | Jan 2013         | Feb 2016        |
| Nanos                                    | ✓               | 78           | 0.3%         | 5          | Dec 2011         | Nov 2016        |
| Amoda                                    | ✓               | 67           | 0.2%         | 1          | Apr 2010         | Aug 2011        |
| Harmony Modular                          | ✓               | 65           | 0.2%         | 6          | Mar 2010         | Mar 2015        |
| ABG II Cementless Stem (modular)         | ✓               | 52           | 0.2%         | 9          | Apr 2009         | Sep 2012        |
| SL                                       | ✓               | 51           | 0.2%         | 5          | Sep 2009         | May 2011        |
| XActa                                    |                 | 47           | 0.2%         | 5          | Jan 2014         | Nov 2016        |
| Avenir Muller Cementless                 | ✓               | 33           | 0.1%         | 6          | Jun 2016         | Feb 2017        |
| Harmony Cemented                         |                 | 25           | 0.1%         | 8          | Feb 2014         | May 2015        |



|    |                             |   |               |      |    |          |          |
|----|-----------------------------|---|---------------|------|----|----------|----------|
| 1  |                             |   |               |      |    |          |          |
| 2  |                             |   |               |      |    |          |          |
| 3  | miniMax                     | ✓ | 24            | 0.1% | 2  | Apr 2011 | Sep 2014 |
| 4  | SMS                         | ✓ | 22            | 0.1% | 2  | Jul 2015 | Oct 2016 |
| 5  | FTS                         | ✓ | 20            | 0.1% | 5  | Feb 2009 | Mar 2010 |
| 6  | Profemur TL Classic         | ✓ | 19            | 0.1% | 5  | Jan 2016 | Feb 2017 |
| 7  | Arcad Cementless            | ✓ | 17            | 0.1% | 12 | Sep 2010 | Feb 2017 |
| 8  | SMF                         | ✓ | 17            | 0.1% | 1  | Oct 2011 | May 2015 |
| 9  | Echelon Cemented Stem       |   | 13            | 0.0% | 9  | Mar 2008 | Dec 2016 |
| 10 | Profemur Preserve           | ✓ | 12            | 0.0% | 5  | Feb 2012 | Jun 2013 |
| 11 | AMiStem HP                  | ✓ | 12            | 0.0% | 1  | Dec 2015 | May 2016 |
| 12 | METS Cemented               |   | 12            | 0.0% | 10 | Dec 2012 | Oct 2016 |
| 13 | GMRS                        |   | 11            | 0.0% | 9  | Aug 2012 | Sep 2016 |
| 14 | Harmony Cementless          | ✓ | 10            | 0.0% | 4  | Apr 2011 | Apr 2015 |
| 15 | UCP Stem                    |   | 10            | 0.0% | 5  | Apr 2016 | Feb 2017 |
| 16 | Exception Cementless        | ✓ | 6             | 0.0% | 3  | Feb 2010 | Mar 2010 |
| 17 | Quadra-C                    |   | 6             | 0.0% | 2  | Oct 2009 | Feb 2015 |
| 18 | Novation Stem               | ✓ | 5             | 0.0% | 2  | Mar 2014 | Mar 2015 |
| 19 | METS Cementless             | ✓ | 5             | 0.0% | 5  | Feb 2013 | Feb 2016 |
| 20 | Securus                     | ✓ | 5             | 0.0% | 5  | Dec 2009 | Mar 2015 |
| 21 | G2 Cementless Stem          | ✓ | 5             | 0.0% | 5  | Dec 2013 | Nov 2015 |
| 22 | Profemur Gladiator          | ✓ | 4             | 0.0% | 3  | Mar 2010 | Jul 2011 |
| 23 | Euros Cementless            | ✓ | 3             | 0.0% | 2  | Aug 2011 | Nov 2011 |
| 24 | Atlantis                    | ✓ | 3             | 0.0% | 3  | Dec 2011 | Apr 2014 |
| 25 | Restoration Cemented Stem   |   | 1             | 0.0% | 1  | Feb 2014 | Feb 2014 |
| 26 | Initiale Cemented Stem      |   | 1             | 0.0% | 1  | Jul 2008 | Jul 2008 |
| 27 | Wagner Revision Stem        | ✓ | 1             | 0.0% | 1  | Apr 2016 | Apr 2016 |
| 28 | Integrale                   | ✓ | 1             | 0.0% | 1  | Jun 2009 | Jun 2009 |
| 29 | optimys                     | ✓ | 1             | 0.0% | 1  | Feb 2017 | Feb 2017 |
| 30 | Prodigy                     | ✓ | 1             | 0.0% | 1  | Jul 2010 | Jul 2010 |
| 31 | CDH Stem                    | ✓ | 1             | 0.0% | 1  | Nov 2012 | Nov 2012 |
| 32 | Friendly                    |   | 1             | 0.0% | 1  | Jul 2012 | Aug 2012 |
| 33 | Regulus Cemented Stem       |   | 1             | 0.0% | 1  | Oct 2016 | Oct 2016 |
| 34 | Arcad Cemented              |   | 1             | 0.0% | 1  | Feb 2009 | Feb 2009 |
| 35 | Endurance Cemented Stem     |   | 1             | 0.0% | 1  | Sep 2013 | Sep 2013 |
| 36 | Furlong HAC Hemiartroplasty | ✓ | 1             | 0.0% | 1  | Oct 2010 | Oct 2010 |
| 37 | C2 Stem                     | ✓ | 1             | 0.0% | 1  | Feb 2015 | Feb 2015 |
| 38 |                             |   |               |      |    |          |          |
| 39 |                             |   |               |      |    |          |          |
| 40 | <b>Total</b>                |   | <b>28,924</b> |      |    |          |          |
| 41 |                             |   |               |      |    |          |          |
| 42 |                             |   |               |      |    |          |          |
| 43 |                             |   |               |      |    |          |          |
| 44 |                             |   |               |      |    |          |          |
| 45 |                             |   |               |      |    |          |          |
| 46 |                             |   |               |      |    |          |          |
| 47 |                             |   |               |      |    |          |          |
| 48 |                             |   |               |      |    |          |          |
| 49 |                             |   |               |      |    |          |          |
| 50 |                             |   |               |      |    |          |          |
| 51 |                             |   |               |      |    |          |          |
| 52 |                             |   |               |      |    |          |          |
| 53 |                             |   |               |      |    |          |          |
| 54 |                             |   |               |      |    |          |          |
| 55 |                             |   |               |      |    |          |          |
| 56 |                             |   |               |      |    |          |          |
| 57 |                             |   |               |      |    |          |          |
| 58 |                             |   |               |      |    |          |          |
| 59 |                             |   |               |      |    |          |          |
| 60 |                             |   |               |      |    |          |          |

1 – Uncemented fixation, Rows in **bold** = five most commonly used new stems

Table S3 Number of different post-2008 shells/cups used by surgeons

| Number of new cups used | Number of surgeons | Percent | Cumulative percent |
|-------------------------|--------------------|---------|--------------------|
| 1                       | 1,280              | 61.9%   | 61.9%              |
| 2                       | 457                | 22.1%   | 84.0%              |
| 3                       | 189                | 9.1%    | 93.1%              |
| 4                       | 84                 | 4.1%    | 97.2%              |
| 5                       | 31                 | 1.5%    | 98.7%              |
| 6                       | 16                 | 0.8%    | 99.4%              |
| 7                       | 7                  | 0.3%    | 99.8%              |
| 8                       | 4                  | 0.2%    | 100.0%             |
| 11                      | 1                  | 0.1%    | 100.0%             |
| <b>Total</b>            | <b>2,069</b>       |         |                    |

Table S4 Number of different post-2008 stems used by surgeons

| Number of new stems used | Number of surgeons | Percent | Cumulative percent |
|--------------------------|--------------------|---------|--------------------|
| 1                        | 888                | 67.6%   | 67.6%              |
| 2                        | 260                | 19.8%   | 87.4%              |
| 3                        | 97                 | 7.4%    | 94.8%              |
| 4                        | 38                 | 2.9%    | 97.7%              |
| 5                        | 15                 | 1.1%    | 98.9%              |
| 6                        | 9                  | 0.7%    | 99.5%              |
| 7                        | 4                  | 0.3%    | 99.9%              |
| 8                        | 1                  | 0.1%    | 99.9%              |
| 9                        | 1                  | 0.1%    | 100.0%             |
| <b>Total</b>             | <b>1,313</b>       |         |                    |

Table S5 The number of unique new stem-cup combinations used simultaneously by surgeons

| Stem-cup combinations | Number of surgeons | Percent | Cumulative percent |
|-----------------------|--------------------|---------|--------------------|
| 1                     | 437                | 70.0%   | 70.0%              |
| 2                     | 113                | 18.1%   | 88.1%              |
| 3                     | 41                 | 6.6%    | 94.7%              |
| 4                     | 17                 | 2.7%    | 97.4%              |
| 5                     | 6                  | 1.0%    | 98.4%              |
| 6                     | 2                  | 0.3%    | 98.7%              |
| 7                     | 2                  | 0.3%    | 99.0%              |
| 8                     | 3                  | 0.5%    | 99.5%              |
| 9                     | 2                  | 0.3%    | 99.8%              |
| 13                    | 1                  | 0.2%    | 100.0%             |
| <b>Total</b>          | 624                | 100%    |                    |

Table S6 Results from unadjusted logistic regression models showing the association between surgeon-level factors and use of new versus old stems and cups

| Exposure                                                                                   | Stems           |                |        | Cups            |                |        |
|--------------------------------------------------------------------------------------------|-----------------|----------------|--------|-----------------|----------------|--------|
|                                                                                            | OR <sup>1</sup> | (95% CI)       | p      | OR <sup>1</sup> | (95% CI)       | p      |
| <b>Proportion of THRs performed on patients &lt;55 years old</b>                           |                 |                |        |                 |                |        |
| <10% (ref.)                                                                                | 1               |                | -      | 1               |                | -      |
| ≥10%                                                                                       | 2.67            | (2.39 to 2.98) | <0.001 | 2.41            | (2.20 to 2.64) | <0.001 |
| <b>Number of THRs performed in calendar year<sup>2</sup><br/>(per 10 additional cases)</b> |                 |                |        |                 |                |        |
|                                                                                            | 1.19            | (1.16 to 1.22) | <0.001 | 1.23            | (1.20 to 1.26) | <0.001 |
| <b>Proportion of THRs funded privately</b>                                                 |                 |                |        |                 |                |        |
| 100% NHS funded (ref.)                                                                     | 1               |                | -      | 1               |                | -      |
| Some or all funded privately                                                               | 2.38            | (2.09 to 2.71) | <0.001 | 2.12            | (1.91 to 2.36) | <0.001 |
| <b>Number of stem-cup combinations used in calendar year</b>                               |                 |                |        |                 |                |        |
| ≤3 (ref.)                                                                                  | 1               |                | -      | 1               |                | -      |
| 4-6                                                                                        | 4.83            | (4.31 to 5.42) | <0.001 | 4.54            | (4.13 to 5.00) | <0.001 |
| 7-10                                                                                       | 13.7            | (11.6 to 16.3) | <0.001 | 11.7            | (9.91 to 13.9) | <0.001 |
| >10                                                                                        | 36.4            | (24.4 to 54.4) | <0.001 | 28.2            | (18.4 to 43.3) | <0.001 |
| <b>Proportion of THRs performed on patients with ASA grade III-V</b>                       |                 |                |        |                 |                |        |
| <25% (ref.)                                                                                | 1               |                | -      | 1               |                | -      |
| ≥25%                                                                                       | 0.81            | (0.72 to 0.91) | 0.001  | 0.92            | (0.84 to 1.01) | 0.08   |

1 – odds ratios, 95% confidence intervals and p-values are from unadjusted logistic regression models

Table S7 Results from unadjusted mixed-effects regression models (patients nested within surgeons) of age, gender, categorised BMI, ASA grade, and source of funding on stem and cup age

|                               | Stems           |                |        | Cups            |                |        |
|-------------------------------|-----------------|----------------|--------|-----------------|----------------|--------|
|                               | OR <sup>1</sup> | (95% CI)       | p      | OR <sup>1</sup> | (95% CI)       | p      |
| <b>Age (years)</b>            |                 |                |        |                 |                |        |
| <55 years old                 | 2.31            | (2.21 to 2.42) | <0.001 | 1.37            | (1.32 to 1.42) | <0.001 |
| 55 to 80 (ref.)               | 1               | -              | -      | 1               | -              | -      |
| ≥ 80 years old                | 0.45            | (0.42 to 0.48) | <0.001 | 0.92            | (0.89 to 0.96) | <0.001 |
| <b>Gender</b>                 |                 |                |        |                 |                |        |
| Male (ref.)                   | 1               | -              | -      | 1               | -              | -      |
| Female                        | 0.77            | (0.75 to 0.80) | <0.001 | 1.10            | (1.07 to 1.13) | <0.001 |
| <b>BMI</b>                    |                 |                |        |                 |                |        |
| Underweight and normal (ref.) | 1               | -              | -      | 1               | -              | -      |
| Overweight                    | 1.11            | (1.06 to 1.16) | <0.001 | 0.96            | (0.93 to 0.99) | 0.01   |
| Class I Obese                 | 1.16            | (1.11 to 1.22) | <0.001 | 0.96            | (0.93 to 1.00) | 0.04   |
| Class II Obese                | 1.25            | (1.18 to 1.33) | <0.001 | 1.00            | (0.95 to 1.05) | 0.90   |
| Class III Obese               | 1.18            | (1.07 to 1.30) | 0.001  | 1.07            | (1.00 to 1.15) | 0.07   |
| <b>ASA grade</b>              |                 |                |        |                 |                |        |
| I (ref.)                      | 1               | -              | -      | 1               | -              | -      |
| II                            | 0.64            | (0.61 to 0.67) | <0.001 | 0.95            | (0.92 to 0.99) | 0.007  |
| III                           | 0.47            | (0.44 to 0.50) | <0.001 | 0.96            | (0.92 to 1.01) | 0.13   |
| IV + V                        | 0.40            | (0.30 to 0.53) | <0.001 | 1.10            | (0.93 to 1.33) | 0.24   |
| <b>Source of funding</b>      |                 |                |        |                 |                |        |
| NHS                           | 1               | -              | -      | 1               | -              | -      |
| Private                       | 0.93            | (0.88 to 0.98) | 0.005  | 1.11            | (1.06 to 1.16) | <0.001 |

1 – odds ratios, 95% confidence intervals and p-values are from unadjusted mixed-effects logistic regression models

Table S8 Sensitivity analysis 1: Results from multivariable adjusted logistic regression models showing the association between surgeon-level factors and use of new versus old stems and cups, excluding surgeon calendar-years with <10 THRs

| Exposure                                                                                   | Stems           |                |        | Cups            |                |        |
|--------------------------------------------------------------------------------------------|-----------------|----------------|--------|-----------------|----------------|--------|
|                                                                                            | OR <sup>1</sup> | (95% CI)       | p      | OR <sup>1</sup> | (95% CI)       | p      |
| <b>Proportion of THRs performed on patients &lt;55 years old</b>                           |                 |                |        |                 |                |        |
| <10% (ref.)                                                                                | 1               | -              | -      | 1               | -              | -      |
| ≥10%                                                                                       | 1.30            | (1.14 to 1.50) | <0.001 | 1.42            | (1.26 to 1.59) | <0.001 |
| <b>Number of THRs performed in calendar year<sup>2</sup><br/>(per 10 additional cases)</b> | 1.02            | (1.00 to 1.05) | 0.04   | 1.05            | (1.03 to 1.08) | <0.001 |
| <b>Proportion of THRs funded privately</b>                                                 |                 |                |        |                 |                |        |
| 100% NHS funded (ref.)                                                                     | 1               | -              | -      | 1               | -              | -      |
| Some or all funded privately                                                               | 1.27            | (1.08 to 1.49) | 0.004  | 1.09            | (0.95 to 1.25) | 0.22   |
| <b>Number of stem-cup combinations used in calendar year</b>                               |                 |                |        |                 |                |        |
| ≤3 (ref.)                                                                                  | 1               | -              | -      | 1               | -              | -      |
| 4-6                                                                                        | 3.57            | (3.04 to 4.18) | <0.001 | 3.05            | (2.69 to 3.46) | <0.001 |
| 7-10                                                                                       | 9.24            | (7.47 to 11.4) | <0.001 | 6.45            | (5.30 to 7.86) | <0.001 |
| >10                                                                                        | 22.1            | (14.4 to 33.8) | <0.001 | 13.1            | (8.48 to 20.4) | <0.001 |
| <b>Proportion of THRs performed on patients with ASA grade III-V</b>                       |                 |                |        |                 |                |        |
| <25% (ref.)                                                                                | 1               | -              | -      | 1               | -              | -      |
| ≥25%                                                                                       | 1.20            | (1.03 to 1.41) | 0.02   | 1.32            | (1.16 to 1.50) | <0.001 |

1 – odds ratios, 95% confidence intervals and p-values are from logistic regression models adjusted for all exposure variables

Table S9 Sensitivity analysis 2a: Results from multivariable adjusted logistic regression models showing the association between surgeon-level factors (consultant in-charge) and use of new versus old stems and cups

| Exposure                                                                                   | Stems           |                |        | Cups            |                |        |
|--------------------------------------------------------------------------------------------|-----------------|----------------|--------|-----------------|----------------|--------|
|                                                                                            | OR <sup>1</sup> | (95% CI)       | p      | OR <sup>1</sup> | (95% CI)       | p      |
| <b>Proportion of THRs performed on patients &lt;55 years old</b>                           |                 |                |        |                 |                |        |
| <10% (ref.)                                                                                | 1               | -              | -      | 1               | -              | -      |
| ≥10%                                                                                       | 1.49            | (1.31 to 1.70) | <0.001 | 1.57            | (1.41 to 1.75) | <0.001 |
| <b>Number of THRs performed in calendar year<sup>2</sup><br/>(per 10 additional cases)</b> | 1.03            | (1.01 to 1.04) | 0.003  | 1.07            | (1.05 to 1.09) | <0.001 |
| <b>Proportion of THRs funded privately</b>                                                 |                 |                |        |                 |                |        |
| 100% NHS funded (ref.)                                                                     | 1               | -              | -      | 1               | -              | -      |
| Some or all funded privately                                                               | 1.27            | (1.09 to 1.49) | 0.002  | 1.17            | (1.02 to 1.33) | 0.02   |
| <b>Number of stem-cup combinations used in calendar year</b>                               |                 |                |        |                 |                |        |
| ≤3 (ref.)                                                                                  | 1               | -              | -      | 1               | -              | -      |
| 4-6                                                                                        | 3.69            | (3.19 to 4.27) | <0.001 | 3.11            | (2.76 to 3.53) | <0.001 |
| 7-10                                                                                       | 8.78            | (7.9 to 10.9)  | <0.001 | 5.61            | (4.58 to 6.88) | <0.001 |
| >10                                                                                        | 22.9            | (15.2 to 34.6) | <0.001 | 11.4            | (7.46 to 17.3) | <0.001 |
| <b>Proportion of THRs performed on patients with ASA grade III-V</b>                       |                 |                |        |                 |                |        |
| <25% (ref.)                                                                                | 1               | -              | -      | 1               | -              | -      |
| ≥25%                                                                                       | 1.22            | (1.06 to 1.42) | 0.007  | 1.25            | (1.11 to 1.41) | <0.001 |

1 – odds ratios, 95% confidence intervals and p-values are from logistic regression models adjusted for all exposure variables



Table S10 Sensitivity analysis 2b: Results from multivariable adjusted mixed-effects regression models (patients nested within 'consultant in-charge') of age, gender, categorised BMI, ASA grade, and source of funding on stem and cup age

|                               | Stems           |                |        | Cups            |                |        |
|-------------------------------|-----------------|----------------|--------|-----------------|----------------|--------|
|                               | OR <sup>1</sup> | (95% CI)       | p      | OR <sup>1</sup> | (95% CI)       | p      |
| <b>Age (years)</b>            |                 |                |        |                 |                |        |
| <55 years old                 | 2.20            | (2.10 to 2.30) | <0.001 | 1.40            | (1.35 to 1.46) | <0.001 |
| 55 to 80 (ref.)               | 1               | -              | -      | 1               | -              | -      |
| ≥ 80 years old                | 0.48            | (0.45 to 0.51) | <0.001 | 0.91            | (0.88 to 0.95) | <0.001 |
| <b>Gender</b>                 |                 |                |        |                 |                |        |
| Male (ref.)                   | 1               | -              | -      | 1               | -              | -      |
| Female                        | 0.81            | (0.78 to 0.84) | <0.001 | 1.11            | (1.08 to 1.14) | <0.001 |
| <b>BMI</b>                    |                 |                |        |                 |                |        |
| Underweight and normal (ref.) | 1               | -              | -      | 1               | -              | -      |
| Overweight                    | 1.03            | (0.99 to 1.08) | 0.18   | 0.97            | (0.94 to 1.00) | 0.08   |
| Class I Obese                 | 1.05            | (1.00 to 1.11) | 0.03   | 0.96            | (0.92 to 0.99) | 0.02   |
| Class II Obese                | 1.12            | (1.05 to 1.20) | 0.001  | 0.98            | (0.93 to 1.03) | 0.37   |
| Class III Obese               | 1.07            | (0.96 to 1.18) | 0.21   | 1.02            | (0.95 to 1.10) | 0.53   |
| <b>ASA grade</b>              |                 |                |        |                 |                |        |
| I (ref.)                      | 1               | -              | -      | 1               | -              | -      |
| II                            | 0.77            | (0.74 to 0.81) | <0.001 | 1.02            | (0.98 to 1.05) | 0.41   |
| III                           | 0.62            | (0.58 to 0.67) | <0.001 | 1.05            | (1.00 to 1.10) | 0.04   |
| IV + V                        | 0.59            | (0.44 to 0.79) | <0.001 | 1.20            | (1.00 to 1.43) | 0.05   |
| <b>Source of funding</b>      |                 |                |        |                 |                |        |
| NHS                           | 1               | -              | -      | 1               | -              | -      |
| Private                       | 1.05            | (1.00 to 1.11) | 0.06   | 1.16            | (1.12 to 1.21) | <0.001 |

1 – odds ratios, 95% confidence intervals and p-values are from mixed-effects logistic regression models adjusted for all exposure variables

1  
2  
3  
4  
5  
6  
7 *Figure S1 The cumulative introduction of new brands of cup and stem components for THRs, between January 1<sup>st</sup> 2008 and 26<sup>th</sup> February 2017*  
8  
9  
10  
11  
12  
13  
14  
15  
16  
17  
18  
19  
20  
21  
22  
23  
24  
25  
26  
27  
28  
29  
30  
31  
32  
33  
34  
35  
36  
37  
38  
39  
40  
41  
42  
43  
44  
45  
46  
47

For peer review only

Figure S2 STROBE Flow diagram

For peer review only

1  
2  
3  
4  
5  
6  
7  
8  
9  
10  
11  
12  
13  
14  
15  
16  
17  
18  
19  
20  
21  
22  
23  
24  
25  
26  
27  
28  
29  
30  
31  
32  
33  
34  
35  
36  
37  
38  
39  
40  
41  
42  
43  
44  
45  
46  
47

# Reporting checklist for cohort study.

Based on the STROBE cohort guidelines.

## Instructions to authors

Complete this checklist by entering the page numbers from your manuscript where readers will find each of the items listed below.

Your article may not currently address all the items on the checklist. Please modify your text to include the missing information. If you are certain that an item does not apply, please write "n/a" and provide a short explanation.

Upload your completed checklist as an extra file when you submit to a journal.

In your methods section, say that you used the STROBE cohort reporting guidelines, and cite them as:

von Elm E, Altman DG, Egger M, Pocock SJ, Gøtzsche PC, Vandenbroucke JP. The Strengthening the Reporting of Observational Studies in Epidemiology (STROBE) Statement: guidelines for reporting observational studies.

|                        |     | Reporting Item                                                                                                                  | Page Number |
|------------------------|-----|---------------------------------------------------------------------------------------------------------------------------------|-------------|
| Title                  | #1a | Indicate the study's design with a commonly used term in the title or the abstract                                              | 4           |
| Abstract               | #1b | Provide in the abstract an informative and balanced summary of what was done and what was found                                 | 4           |
| Background / rationale | #2  | Explain the scientific background and rationale for the investigation being reported                                            | 6           |
| Objectives             | #3  | State specific objectives, including any prespecified hypotheses                                                                | 6           |
| Study design           | #4  | Present key elements of study design early in the paper                                                                         | 7           |
| Setting                | #5  | Describe the setting, locations, and relevant dates, including periods of recruitment, exposure, follow-up, and data collection | 7           |
| Eligibility criteria   | #6a | Give the eligibility criteria, and the sources and methods of selection of participants. Describe methods of follow-up.         | 7           |
|                        | #6b | For matched studies, give matching criteria and number of exposed and                                                           | See note    |

|    |                  |                                                                              |          |
|----|------------------|------------------------------------------------------------------------------|----------|
| 1  |                  | unexposed                                                                    | 1        |
| 2  |                  |                                                                              |          |
| 3  | Variables        | #7 Clearly define all outcomes, exposures, predictors, potential             | 7-8      |
| 4  |                  | confounders, and effect modifiers. Give diagnostic criteria, if applicable   |          |
| 5  |                  |                                                                              |          |
| 6  | Data sources /   | #8 For each variable of interest give sources of data and details of methods | 7-8      |
| 7  | measurement      | of assessment (measurement). Describe comparability of assessment            |          |
| 8  |                  | methods if there is more than one group. Give information separately         |          |
| 9  |                  | for for exposed and unexposed groups if applicable.                          |          |
| 10 |                  |                                                                              |          |
| 11 |                  |                                                                              |          |
| 12 |                  |                                                                              |          |
| 13 | Bias             | #9 Describe any efforts to address potential sources of bias                 | 8-9      |
| 14 |                  |                                                                              |          |
| 15 | Study size       | #10 Explain how the study size was arrived at                                | See note |
| 16 |                  |                                                                              | 2        |
| 17 |                  |                                                                              |          |
| 18 |                  |                                                                              |          |
| 19 | Quantitative     | #11 Explain how quantitative variables were handled in the analyses. If      | 8-9      |
| 20 | variables        | applicable, describe which groupings were chosen, and why                    |          |
| 21 |                  |                                                                              |          |
| 22 |                  |                                                                              |          |
| 23 | Statistical      | #12a Describe all statistical methods, including those used to control for   | 8-9      |
| 24 | methods          | confounding                                                                  |          |
| 25 |                  |                                                                              |          |
| 26 |                  |                                                                              |          |
| 27 |                  | #12b Describe any methods used to examine subgroups and interactions         | 8-9      |
| 28 |                  |                                                                              |          |
| 29 |                  | #12c Explain how missing data were addressed                                 | 8        |
| 30 |                  |                                                                              |          |
| 31 |                  | #12d If applicable, explain how loss to follow-up was addressed              | See note |
| 32 |                  |                                                                              | 3        |
| 33 |                  |                                                                              |          |
| 34 |                  |                                                                              |          |
| 35 |                  | #12e Describe any sensitivity analyses                                       | 8-9      |
| 36 |                  |                                                                              |          |
| 37 | Participants     | #13a Report numbers of individuals at each stage of study—eg numbers         | 9-10     |
| 38 |                  | potentially eligible, examined for eligibility, confirmed eligible,          |          |
| 39 |                  | included in the study, completing follow-up, and analysed. Give              |          |
| 40 |                  | information separately for for exposed and unexposed groups if               |          |
| 41 |                  | applicable.                                                                  |          |
| 42 |                  |                                                                              |          |
| 43 |                  |                                                                              |          |
| 44 |                  |                                                                              |          |
| 45 |                  |                                                                              |          |
| 46 |                  | #13b Give reasons for non-participation at each stage                        | 9-10     |
| 47 |                  |                                                                              |          |
| 48 |                  | #13c Consider use of a flow diagram                                          | Figure   |
| 49 |                  |                                                                              | S2       |
| 50 |                  |                                                                              |          |
| 51 |                  |                                                                              |          |
| 52 | Descriptive data | #14a Give characteristics of study participants (eg demographic, clinical,   | 9-10     |
| 53 |                  | social) and information on exposures and potential confounders. Give         |          |
| 54 |                  | information separately for exposed and unexposed groups if applicable.       |          |
| 55 |                  |                                                                              |          |
| 56 |                  |                                                                              |          |
| 57 |                  | #14b Indicate number of participants with missing data for each variable of  | See note |
| 58 |                  |                                                                              |          |
| 59 |                  |                                                                              |          |
| 60 |                  |                                                                              |          |

|                  |      |                                                                                                                                                                                                          |            |
|------------------|------|----------------------------------------------------------------------------------------------------------------------------------------------------------------------------------------------------------|------------|
|                  |      | interest                                                                                                                                                                                                 | 4          |
|                  | #14c | Summarise follow-up time (eg, average and total amount)                                                                                                                                                  | See note 5 |
| Outcome data     | #15  | Report numbers of outcome events or summary measures over time. Give information separately for exposed and unexposed groups if applicable.                                                              | See note 6 |
| Main results     | #16a | Give unadjusted estimates and, if applicable, confounder-adjusted estimates and their precision (eg, 95% confidence interval). Make clear which confounders were adjusted for and why they were included | See note 7 |
|                  | #16b | Report category boundaries when continuous variables were categorized                                                                                                                                    | See note 8 |
|                  | #16c | If relevant, consider translating estimates of relative risk into absolute risk for a meaningful time period                                                                                             | See note 9 |
| Other analyses   | #17  | Report other analyses done—e.g., analyses of subgroups and interactions, and sensitivity analyses                                                                                                        | 9-11       |
| Key results      | #18  | Summarise key results with reference to study objectives                                                                                                                                                 | 11-12      |
| Limitations      | #19  | Discuss limitations of the study, taking into account sources of potential bias or imprecision. Discuss both direction and magnitude of any potential bias.                                              | 12         |
| Interpretation   | #20  | Give a cautious overall interpretation considering objectives, limitations, multiplicity of analyses, results from similar studies, and other relevant evidence.                                         | 12-13      |
| Generalisability | #21  | Discuss the generalisability (external validity) of the study results                                                                                                                                    | 14         |
| Funding          | #22  | Give the source of funding and the role of the funders for the present study and, if applicable, for the original study on which the present article is based                                            | 3          |

## Author notes

1. n/a - not relevant
2. n/a - not relevant
3. n/a - not relevant
4. 10 and Fig S2

1 5. n/a - not relevant

2 6. Tables 1 & 2

3 7. Tables S6 & S7

4 8. n/a - not needed

5 9. n/a - not needed

6  
7  
8  
9  
10  
11  
12 The STROBE checklist is distributed under the terms of the Creative Commons Attribution License CC-BY.  
13 This checklist was completed on 31. January 2019 using <https://www.goodreports.org/>, a tool made by the  
14 [EQUATOR Network](#) in collaboration with [Penelope.ai](#)  
15  
16  
17  
18  
19  
20  
21  
22  
23  
24  
25  
26  
27  
28  
29  
30  
31  
32  
33  
34  
35  
36  
37  
38  
39  
40  
41  
42  
43  
44  
45  
46  
47  
48  
49  
50  
51  
52  
53  
54  
55  
56  
57  
58  
59  
60

# BMJ Open

## Understanding the uptake of new hip replacement implants in the UK: A cohort study using data from the National Joint Registry for England and Wales

|                                 |                                                                                                                                                                                                                                                                                                                                                                                                                                                                                                                                                                                                                                                                                                                                                                                                                                                                                                                                                                                                                                                                                                                                                                                                                                                                                                                                                                                                                                                                                                                                                                                                                                                                                             |
|---------------------------------|---------------------------------------------------------------------------------------------------------------------------------------------------------------------------------------------------------------------------------------------------------------------------------------------------------------------------------------------------------------------------------------------------------------------------------------------------------------------------------------------------------------------------------------------------------------------------------------------------------------------------------------------------------------------------------------------------------------------------------------------------------------------------------------------------------------------------------------------------------------------------------------------------------------------------------------------------------------------------------------------------------------------------------------------------------------------------------------------------------------------------------------------------------------------------------------------------------------------------------------------------------------------------------------------------------------------------------------------------------------------------------------------------------------------------------------------------------------------------------------------------------------------------------------------------------------------------------------------------------------------------------------------------------------------------------------------|
| Journal:                        | <i>BMJ Open</i>                                                                                                                                                                                                                                                                                                                                                                                                                                                                                                                                                                                                                                                                                                                                                                                                                                                                                                                                                                                                                                                                                                                                                                                                                                                                                                                                                                                                                                                                                                                                                                                                                                                                             |
| Manuscript ID                   | bmjopen-2019-029572.R1                                                                                                                                                                                                                                                                                                                                                                                                                                                                                                                                                                                                                                                                                                                                                                                                                                                                                                                                                                                                                                                                                                                                                                                                                                                                                                                                                                                                                                                                                                                                                                                                                                                                      |
| Article Type:                   | Original research                                                                                                                                                                                                                                                                                                                                                                                                                                                                                                                                                                                                                                                                                                                                                                                                                                                                                                                                                                                                                                                                                                                                                                                                                                                                                                                                                                                                                                                                                                                                                                                                                                                                           |
| Date Submitted by the Author:   | 03-Sep-2019                                                                                                                                                                                                                                                                                                                                                                                                                                                                                                                                                                                                                                                                                                                                                                                                                                                                                                                                                                                                                                                                                                                                                                                                                                                                                                                                                                                                                                                                                                                                                                                                                                                                                 |
| Complete List of Authors:       | Penfold, Chris; University of Bristol, Musculoskeletal Research Unit, Translational Health Sciences, Bristol Medical School; University Hospitals Bristol NHS Foundation Trust and University of Bristol, National Institute for Health Research Bristol Biomedical Research Centre<br>Blom, AW; University of Bristol, Musculoskeletal Research Unit, Translational Health Sciences, Bristol Medical School; University Hospitals Bristol NHS Foundation Trust and University of Bristol, National Institute for Health Research Bristol Biomedical Research Centre<br>Sayers, Adrian; University of Bristol, Musculoskeletal Research Unit, Translational Health Sciences, Bristol Medical School; University of Bristol, Population Health Sciences, Bristol Medical School<br>Wilkinson, J. Mark; Northern General Hospital, Metabolic Bone Unit, Sorby Wing; University of Sheffield, 5. Department of Oncology and Metabolism and The Mellanby Centre for Bone Research<br>Hunt, Linda; University of Bristol, Musculoskeletal Research Unit, Translational Health Sciences, Bristol Medical School<br>Judge, Andrew; University of Bristol, Musculoskeletal Research Unit, Translational Health Sciences, Bristol Medical School; University Hospitals Bristol NHS Foundation Trust and University of Bristol, National Institute for Health Research Bristol Biomedical Research Centre<br>Whitehouse, Michael; University of Bristol, Musculoskeletal Research Unit, Translational Health Sciences, Bristol Medical School; University Hospitals Bristol NHS Foundation Trust and University of Bristol, National Institute for Health Research Bristol Biomedical Research Centre |
| <b>Primary Subject Heading</b>: | Surgery                                                                                                                                                                                                                                                                                                                                                                                                                                                                                                                                                                                                                                                                                                                                                                                                                                                                                                                                                                                                                                                                                                                                                                                                                                                                                                                                                                                                                                                                                                                                                                                                                                                                                     |
| Secondary Subject Heading:      | Health services research                                                                                                                                                                                                                                                                                                                                                                                                                                                                                                                                                                                                                                                                                                                                                                                                                                                                                                                                                                                                                                                                                                                                                                                                                                                                                                                                                                                                                                                                                                                                                                                                                                                                    |
| Keywords:                       | Orthopaedic & trauma surgery < SURGERY, Joint replacement, Implant, Patient, Surgeon, National Joint Registry                                                                                                                                                                                                                                                                                                                                                                                                                                                                                                                                                                                                                                                                                                                                                                                                                                                                                                                                                                                                                                                                                                                                                                                                                                                                                                                                                                                                                                                                                                                                                                               |
|                                 |                                                                                                                                                                                                                                                                                                                                                                                                                                                                                                                                                                                                                                                                                                                                                                                                                                                                                                                                                                                                                                                                                                                                                                                                                                                                                                                                                                                                                                                                                                                                                                                                                                                                                             |

SCHOLARONE™  
Manuscripts



1  
2  
3  
4  
5  
6  
7  
8  
9  
10  
11  
12  
13  
14  
15  
16  
17  
18  
19  
20  
21  
22  
23  
24  
25  
26  
27  
28  
29  
30  
31  
32  
33  
34  
35  
36  
37  
38  
39  
40  
41  
42  
43  
44  
45  
46  
47  
48  
49  
50  
51  
52  
53  
54  
55  
56  
57  
58  
59  
60

1  
2  
3  
4  
5 Understanding the uptake of new hip replacement implants in the  
6  
7  
8 UK: A cohort study using data from the National Joint Registry for  
9  
10  
11  
12 England and Wales  
13  
14  
15  
16

17 Chris M Penfold<sup>1+2\*</sup>

18  
19 Ashley W Blom<sup>1+2</sup>

20  
21  
22 Adrian Sayers<sup>1+3</sup>

23  
24 J Mark Wilkinson<sup>4+5</sup>

25  
26 Linda P Hunt<sup>1</sup>

27  
28 Andrew Judge<sup>1+2</sup>

29  
30 Michael R Whitehouse<sup>1+2</sup>

31  
32  
33  
34  
35  
36 Affiliations:

- 37  
38 1. Musculoskeletal Research Unit, Translational Health Sciences, Bristol Medical School, 1st Floor  
39 Learning & Research Building, Southmead Hospital, Bristol, BS10 5NB, UK  
40  
41 2. National Institute for Health Research Bristol Biomedical Research Centre, University Hospitals  
42 Bristol NHS Foundation Trust and University of Bristol.  
43  
44 3. Population Health Sciences, Bristol Medical School, University of Bristol, Bristol  
45  
46 4. Metabolic Bone Unit, Sorby Wing, Northern General Hospital, Sheffield, S5 7AU, UK  
47  
48 5. Department of Oncology and Metabolism and The Mellanby Centre for Bone Research, University of  
49 Sheffield  
50  
51  
52  
53  
54  
55  
56  
57

1  
2  
3  
4  
5  
6  
7  
8  
9  
10  
11  
12  
13  
14  
15  
16  
17  
18  
19  
20  
21  
22  
23  
24  
25  
26  
27  
28  
29  
30  
31  
32  
33  
34  
35  
36  
37  
38  
39  
40  
41  
42  
43  
44  
45  
46  
47  
48  
49  
50  
51  
52  
53  
54  
55  
56  
57  
58  
59  
60

For peer review only

1  
2  
3 \* - denotes corresponding author  
4  
5

6  
7 Corresponding author contact details:  
8

9 Email: [chris.penfold@bristol.ac.uk](mailto:chris.penfold@bristol.ac.uk)  
10

11 Address: Musculoskeletal Research Unit, University of Bristol, School of Clinical Sciences, Learning and  
12 Research Building, Southmead Hospital, Bristol, BS10 5NB  
13

14  
15 Telephone: 0117 41 47863  
16  
17

## 18 19 20 21 Keywords

22  
23 Orthopaedics, joint replacement, implant, patient, surgeon, national joint registry  
24  
25

## 26 27 28 Data sharing statement

29  
30 Access to the data analysed in this study required permission from the National Joint Registry for  
31 England, Wales and Northern Ireland Research Sub-committee.  
32

33 <http://www.njrcentre.org.uk/njrcentre/Research/Researchrequests/tabid/305/Default.aspx> contains  
34 information on research data access request to the National Joint Registry.  
35  
36  
37

## 38 39 40 Acknowledgements

41  
42 This study was funded by the NIHR Biomedical Research Centre at University Hospitals Bristol NHS  
43 Foundation Trust and the University of Bristol. The views expressed are those of the author(s) and not  
44 necessarily those of the NIHR or the Department of Health and Social Care. We thank the patients and  
45 staff of all the hospitals who have contributed data to the National Joint Registry. We are grateful to the  
46 Healthcare Quality Improvement Partnership, the National Joint Registry Steering Committee, and staff  
47 at the National Joint Registry for facilitating this work.  
48  
49  
50  
51  
52  
53  
54  
55  
56  
57

## Disclaimer

The views expressed represent those of the authors and do not necessarily reflect those of the National Joint Registry Steering Committee or Healthcare Quality Improvement Partnership, who do not vouch for how the information is presented. The views expressed in this article are those of the authors and not necessarily those of the NHS, the NIHR, or the Department of Health and Social Care.

## Ethics approval

Patient consent was obtained for data collection by the National Joint Registry. According to the specifications of the NHS Health Research Authority, separate informed consent and ethical approval were not required for the present study.

## Author Contributions

CP, AB, AJ and MW designed the study. CP, AB, AS, JMW, LH, AJ and MW reviewed the published work. CP conducted the statistical analysis and wrote the manuscript. All authors contributed to critical review of the manuscript and its revision. CP had full access to all the data and AB is the guarantor.

## Conflicts of Interest

Competing interests: All authors have completed the ICMJE uniform disclosure form at [www.icmje.org/coi\\_disclosure.pdf](http://www.icmje.org/coi_disclosure.pdf) and declare: no support from any organisation for the submitted work. AB and MW are involved in a separate grant to the University of Bristol funded by Stryker. All other authors declare no financial relationships with any organisations that might have an interest in the submitted work in the previous three years. All authors declare no other relationships or activities that could appear to have influenced the submitted work.

## Funding

This study was funded by the NIHR Biomedical Research Centre at University Hospitals Bristol NHS Foundation Trust and the University of Bristol. Adrian Sayers was supported by a MRC fellowship MR/L01226X/1.

## Word count

4055 words

## Abstract

### Objectives

Primary: describe uptake of new implant components (femoral stem or acetabular cup/shell) for total hip replacements (THRs) in the National Joint Registry for England and Wales (NJR). Secondary: compare the characteristics of: a) surgeons b) patients who used/received new rather than established components.

### Design

Cohort of 618,393 primary THRs performed for osteoarthritis (±other indications) by 4,979 surgeons between 2008-2017 in England and Wales from the NJR. We described the uptake of new (first recorded use >2008, used within 5 years) stems/cups, and variation in uptake by surgeons (primary objectives). We explored surgeon-level and patient-level factors associated with use/receipt of new components with logistic regression models (secondary objectives).

### Outcomes

Primary outcomes: total number of new cups/stems, proportion of operations using new versus established components. Secondary outcomes: odds of: a) a surgeon using a new cup/stem in a calendar-year, b) a patient receiving a new rather than established cup/stem.

### Results

Sixty-eight new cups and 72 new stems were used in 47,606 primary THRs (7.7%) by 2,005 surgeons (40.3%) 2008-2017. Surgeons used a median of one new stem and cup (25%-75%=1-2 both, max=10

1  
2  
3 cups, max=8 stems). Surgeons performed a median total of 22 THRs (25%-75%=5-124, range=1-3,938) in  
4 the period 2008-2017. Surgeons used new stems in a median of 5.0% (25%-75%=1.3-16.1%) and new  
5 cups in a median of 9.4% (25%-75%=2.8-26.7%) of their THRs. Patients aged <55 years old versus those  
6  
7 55-80 had higher odds of receiving a new rather than established stem (OR=1.83, 95%CI=1.73-1.93) and  
8  
9 cup (OR=1.31, 95%CI=1.25-1.37). Women had lower odds of receiving a new stem (OR=0.87,  
10  
11 95%CI=0.84-0.90), higher odds of receiving a new cup (OR=1.06, 95%CI=1.03-1.09).  
12  
13

## 14 Conclusions

15  
16 Large numbers of new THR components have been introduced in the NJR since 2008. 40% of surgeons  
17  
18 have tried new components, with wide variation in how many types and frequency they have been  
19  
20 used.  
21  
22

## 23 Article Summary

### 24 Strengths and limitations of this study

- 25  
26 • This study provides a nationally representative description of the uptake of new implant  
27  
28 components for total hip replacements in England and Wales.
- 29  
30 • This is the first study to describe the variation in uptake of new components by surgeons, and  
31  
32 surgeon characteristics which may be associated with the use of new components.
- 33  
34 • Although implant component brand names were checked by the authors, some components  
35  
36 may have been reclassified or we may still have misclassified some components as either new or  
37  
38 established, but the introduction of unique device identifiers should remove this problem in  
39  
40 future.
- 41  
42 • The surgeon assigned as lead operating surgeon in the NJR may not be correct, although  
43  
44 consistency between our sensitivity and primary analyses indicate that this is unlikely to have  
45  
46 substantially affected our findings.
- 47  
48 • Hospital-level or regional variation in suppliers may be important factors affecting implant  
49  
50 uptake, but these were beyond the scope of this study.  
51  
52  
53  
54  
55  
56  
57  
58  
59  
60

## Background

Total hip replacements (THRs) are mainly performed to treat pain and functional limitation due to osteoarthritis (OA).[1] It is a highly successful surgical procedure with typical 10-year revision rates <5%,[2] the current NICE benchmark.[3] However, younger patients are more likely to require revision surgery; the lifetime revision risk for men having a THR in their 50s is ~35% compared with 5% in their 70s.[4] Such patients may benefit the most from developments in THR that lead to reduced revision rates or improved outcomes. However, they may also be affected for the longest time if these developments lead to poorer outcomes.

Some new implant designs intended to benefit these more active and/or younger patients have been high-profile failures, for example metal-on-metal THRs [5] including the Articular Surface Replacement (ASR) prostheses in particular.[6] Many new implants, the ASR included,[7] were introduced with minimal supporting evidence of their effectiveness [8] and may offer at best no improvement over pre-existing components.[9] An influential agenda for surgery research (IDEAL) was developed, providing a framework for future investigations into surgical innovations, which recommended the phased introduction of new medical devices.[10] The rapid uptake of ASR hip replacements before the publication of supporting evidence bypassed IDEAL Stages 2a ('Development') and 2b ('Early dispersion and exploration'). Instead, long-term monitoring was relied on to monitor outcomes (Stage 4).[7] It is not clear whether the uptake of newer implants has also been rapid.

There is wide variation between and within regions in the use of common surgical procedures, which are only explained to a small degree by differing patient demands and diagnostic practices.[11] The large number of different components used in primary THRs (127 femoral stems and 105 acetabular cups recorded in the National Joint Registry for England, Wales, Northern Ireland and the Isle of Man (NJR) in 2016) [12] may be an important source of variation. Many registries describe the volume of different implant components used annually but not the variation in uptake of new implants between surgeons or which patients receive them. More research is needed to understand and reduce avoidable variation in outcomes created by differences in surgical activity.

We aimed to:

1. Describe the uptake of new implants for THRs in the NJR
2. Describe how this uptake varies by surgeons
3. Compare surgeons who use new compared with established components



- 1
- 2
- 3 4. Compare patients who receive new compared with established components
- 4
- 5
- 6
- 7

## 8 Methods

### 10 Data Source

11 The NJR was established in 2003.[2] Data entry for Northern Ireland and the Isle of Man did not  
12 commence until 2013 and 2015, respectively therefore they are excluded from this analysis. Key  
13 markers of NJR data quality were high and stable from 2008 onwards [13].

### 19 Study sample

20 We included the cohort of patients who received a primary THR for OA ( $\pm$  other indications) between 1<sup>st</sup>  
21 January 2008 and 26<sup>th</sup> February 2017. We used NJR data from 2003 onwards to calculate the date each  
22 implant component was first used and the total number of implantations. We excluded people who had  
23 not given consent for recording of personal details, where the brand of their acetabular or femoral  
24 components was uncertain, and those who received a resurfacing rather than stemmed THR.  
25 Resurfacing THRs were excluded since patients who receive these are a very different demographic from  
26 those receiving stemmed THRs (significantly younger and more likely to be male), and the annual  
27 volume is very low (~550 in 2017) and decreasing [14].

### 36 Patient involvement

37 This study was designed and undertaken without patient involvement.

### 41 Definition of new and established implant components

42 We identified the implant component brand from component labels recorded in the NJR. We used the  
43 earliest recorded use by any surgeon in the NJR of each femoral (stem) or acetabular (cup or shell)  
44 component to define an implant component's start date. We classified implant components with a start  
45 date between the beginning of NJR data collection (2003) and the end of 2007 as 'established'. This  
46 allowed implant components which were in use before the NJR started but which may have only been  
47 used occasionally to be recorded in the NJR and classified appropriately as 'established'. NJR data quality  
48 was also high and stable from 2008 onwards. Implant components with a start date on or after 1<sup>st</sup>  
49

1  
2  
3 January 2008 and which were used within five years of this start date were classified as 'new'. Those  
4 used later than five years after their start date were classified as 'established'.  
5  
6

### 7 Surgeon uptake of new implant components 8

9  
10 All surgeons with operations recorded in the NJR are assigned an anonymised identifier and their role in  
11 the operation ("consultant in charge" or "operating") is recorded. We summarised each operating  
12 surgeon's activity across each calendar-year in which they performed  $\geq 1$  THR. We considered five  
13 potential surgeon-level factors which may be associated with use of a new component in a calendar-  
14 year: total volume of THRs performed in that year, proportion of those THRs performed on patients <55  
15 years old (<10% and  $\geq 10\%$ ), source of funding for THRs ('100% NHS funded' or 'some or all privately  
16 funded'), proportion of THRs performed on patients with an American Society of Anaesthesiologists  
17 (ASA) grade III-V (<25% and  $\geq 25\%$ ), and the range of different stem-cup combinations used in that  
18 calendar-year (' $\leq 3$ ', '4-6', '7-10' and '>10'). Surgeons who performed  $\geq 10\%$  of their THRs on patients  
19 aged <55 years old and those who performed  $\geq 25\%$  of their THRs on patients with ASA III-V were in  
20 approximately the upper quartile of these distributions.  
21  
22  
23  
24  
25  
26  
27  
28

### 29 Patients receiving new implant components 30

31 We used date of surgery to order patients within implant components and within surgeons. We  
32 categorised patients according to whether the component they received was new or established. We  
33 considered five potential patient-level factors which may be associated with their receipt of new  
34 components: age at the time of THR (<55, 55-80, and 80+ years), gender, body mass index (BMI), ASA  
35 grade, and NHS or private funding. We selected these categories for age to reflect patients who were  
36 having a primary THR at a relatively young or relatively old age, the median age at the time of primary  
37 THR was 69 years (25%-75% 61-76 years).[14]  
38  
39  
40  
41  
42  
43  
44

### 45 Statistical analyses 46

47 We described the use of unique stems and cups in primary THRs performed since January 1<sup>st</sup> 2008, the  
48 cumulative use of new components in patients, and the count of surgeons who used new components.  
49 We also described the total number of all and new cups, stems, and combinations.  
50  
51  
52  
53  
54  
55  
56  
57  
58  
59  
60

### *Surgeon-level factors*

In analyses of surgeon-level and patient-level factors associated with use of or receipt of new implants we included only those people with complete exposure and outcome data for the surgeon-level and patient-level analysis models (i.e. complete case analysis). We assumed that data were missing at random but did not use multiple imputation to account for these missing data since there were no variables in the NJR dataset which were not already in our regression models and which may have carried information about the missing data (particularly BMI).

Our outcome was whether a surgeon used a new component at least once for a THR in a calendar-year (stems and cups analysed separately), unit of analysis was surgeon calendar-years and exposure variables were those surgeon-level factors defined previously. We used multivariable logistic regression models, accounting for the clustering of calendar-years within surgeons.

### *Patient-level factors*

Our outcome was whether a patient received a new rather than established component (stems and cups analysed separately), unit of analysis was patients and exposure variables were those patient-level factors defined previously. Patient-level factors were included in multivariable mixed-effects logistic regression models, with patients nested within surgeons.

### *Sensitivity analyses*

We conducted three sensitivity analyses. To determine whether the lack of variability in patients operated on by low volume surgeons affected our results we repeated our surgeon-level analysis excluding calendar-years for surgeons in which they performed <10 THRs. We also considered that the choice of component was made by the consultant in-charge rather than the operating surgeon (the consultant in-charge was not the operating surgeon for ~16% of THRs). We repeated our surgeon-level analysis by consultant in-charge and repeated our patient-level analysis with patients clustered within consultant in-charge.

In order to determine the extent to which patients with complete data for all exposures and outcome variables differed from those missing some exposure data (mainly BMI) we compared these groups using chi-square tests. We also repeated our patient-level analyses for those patients with complete data for all exposure variables (including BMI) but excluding BMI from the model, and for those with complete data for all exposure variable (excluding BMI).

1  
2  
3 All analyses were performed using Stata v15 (StataCorp).  
4  
5  
6  
7

## 8 Results

9

### 10 Overall use of implant components

11

12  
13 Between 1<sup>st</sup> January 2008 and 26<sup>th</sup> February 2017, 618,393 primary THRs were performed for OA in  
14 England and Wales and recorded in the NJR, corresponding to 23,887 calendar-years in which surgeons  
15 performed  $\geq 1$  THR. The mean age of the patients was 68.5 years (SD=11.1 years), 60.7% were female,  
16 their ASA grades were I:14.2%, II:69.9%, III:15.5% and IV/V:0.5%. Twenty-three percent had a  
17 normal/underweight BMI, 39.6% were overweight and 37.6% obese. THRs were performed by 4,979  
18 surgeons using 189 different stems, 187 cups and 2,026 stem-cup combinations. Surgeons used a  
19 median of three different stems (25%-75%=2-5, max=21), four cups (25%-75%=2-7, max=27) and five  
20 combinations (25%-75%=2-9, max=60). They performed a median total of 22 THRs between 2008 and  
21 2017 (25%-75%=5-124, range 1-3,938), although this includes surgeons who started part way through  
22 this period, retired or changed their practice. Excluding calendar-years in which a surgeon performed no  
23 THRs, the median number of THRs surgeons performed per year was 11 (25%-75%=3-35, range 1-584)  
24 and in 47% of surgeon calendar-years (11,164 of 23,887) surgeons performed  $< 10$  THRs.  
25  
26  
27  
28  
29  
30  
31  
32  
33

### 34 Use of new implant components

35

36  
37 During this period 68 new cups (47 uncemented, Table S1) and 72 new stems (51 uncemented, Table S2)  
38 were first used. The rate of introduction of new cups and stems remained stable (~16 new  
39 components/year, Figure S1). Eight percent (n= 47,606) of THRs performed used a new stem, cup, or  
40 combination. Forty percent (n=2,005) of surgeons who performed a THR in this period used at least one  
41 new implant component.  
42  
43  
44

45  
46 New cups were used in 5.8% (n= 35,885) THRs performed by 34.1% (n=1,699) surgeons (Table S1), new  
47 stems in 2.9% (n= 18,159) THRs by 22.3% (n=1,111) surgeons (Table S2) and new combinations in 1.0%  
48 (n= 6,438) THRs by 8.7% (n=433) surgeons. Most new cups (n= 19,775, 55.1%) and almost all new stems  
49 (n= 15,361, 84.6%) were uncemented. The median number of new stems, cups and combinations used  
50 by surgeons was one (25%-75%=1-2, cups max=10, stems max=8 and combinations max=9; Table S3,  
51 Table S4 & Table S5). The median THRs performed using new stems was three (25%-75%=1-11,  
52 max=637) and new cups was three (25%-75%=1-14, max=867). The median proportion of a surgeon's  
53  
54  
55  
56  
57  
58  
59  
60

1  
2  
3 THR performed using new stems was 3.4% (25%-75%=1.0-10.6%), new cups 6.3% (25%-75%=2.0-18.8%)  
4 and new combinations 2.4% (25%-75%=0.7-9.1%).  
5  
6

7 The five most frequently implanted new stems were used in 9,049 THRs (49.8% of THRs using a new  
8 stem, Table S2). The five most frequently implanted new cups were used in 26,962 THRs (75.1% of THRs  
9 using a new cup, Table S1). Uptake of the two most popular new cups was rapid (5,000 uses of Exeter X3  
10 Rimfit 1,016 days, 5,000 uses of Trinity 1,651 days after first use, Figure 1) but was slower for new stems  
11 (2,000 uses of Polarstem Cementless 1,670 days, Figure 1). Conversely, a third of the new stems and  
12 cups (n=26/72 new stems, n=25/69 new cups) have been used in  $\leq 10$  THRs, and most of these have  
13 been used in  $\leq 5$  THRs (n=22 stems, n=20 cups).  
14  
15  
16  
17  
18  
19

## 20 Surgeon-level and patient-level factors associated with new implant components

21  
22 Our complete case analysis included 431,955 out of a possible 618,393 THRs (69.8%) and 20,410 out of a  
23 possible 23,887 surgeon calendar-years (85.4%, Figure S2). We were missing patient-level data for BMI  
24 (n=186,308, 30.1%) and source of funding (n=1,514, 0.2%). The characteristics of the subset of patients  
25 with complete data are shown in Table S6. There were minor differences between people with complete  
26 data and those with incomplete data (Table S6). Compared with people with incomplete data, a smaller  
27 proportion of people with complete data were aged  $\geq 80$  years old (14.8% vs 16.4%), female (60.3% vs  
28 61.6%) and had their operation funded through the NHS (86.9% vs 89.4%).  
29  
30  
31  
32  
33

### 34 *Characteristics of surgeons using new implant components*

35  
36  
37 Multivariable associations between surgeon-level factors and their use of new components in a  
38 calendar-year were consistent between stems and cups (Table 1, unadjusted Table S7). Surgeons who  
39 treated more younger patients had 47% higher odds of using a new stem (OR=1.47, 95%CI 1.30-1.66,  
40  $p < 0.001$ ) and 39% higher odds of using a new cup (OR=1.39, 95%CI 1.25-1.53,  $p < 0.001$ ) in a calendar-  
41 year. Those who performed more THRs/year had 6% higher odds of using new cups (OR=1.06, 95%CI  
42 1.04-1.08,  $p < 0.001$ ) and 2% higher odds of using new stems (OR=1.02, 95%CI 1.00-1.05,  $p = 0.03$ ),  
43 although the confidence interval crossed the null. Private funding was associated with 23% increased  
44 odds of using new stems (OR=1.23, 95%CI 1.05-1.43,  $p = 0.010$ ) and weakly associated with 9% increased  
45 odds of using new cups (OR=1.09, 95%CI 0.96-1.23,  $p = 0.187$ ) with confidence intervals crossing the null  
46 value. Use of more stem-cup combinations was strongly associated with increased use of new  
47 components (ORs for '>10' vs. ' $\leq 3$ ' combinations: 27.4 and 13.3 for stems and cups respectively,  $p$  values  
48  $< 0.001$ ). Proportion of patients with ASA grades III-IV was weakly associated with 12% higher odds of  
49  
50  
51  
52  
53  
54  
55  
56  
57

1  
2  
3 using new cups (OR=1.12, 95%CI 1.01-1.25, P=0.034) but not with using new stems (OR=1.01, 95%CI  
4 0.89-1.16, p=0.843).

### 5 6 7 *Characteristics of patients receiving new implant components*

8  
9 A higher proportion of recipients of new compared with established implant components were aged <55  
10 years old (10.5% established vs. 21.3% new stems; 10.5% established vs. 14.8% new cups; Table 2),  
11 although the main recipients of all components were aged 55-80 years. Fifteen percent of recipients of  
12 established stems (15.0%) were ≥80 years old compared with 8.3% of recipients of new stems, but there  
13 was little difference in the proportion of older recipients of established (14.9%) and new (13.3%) cups.  
14 Across all components and component age, women were the main recipients of THRs. There was no  
15 difference in BMI between recipients of established and new stems or cups. A higher proportion of  
16 recipients of new components had ASA grade I (20.3% new vs. 14.3% established stems; 17.1% new vs.  
17 14.3% established cups). A higher proportion of people with privately funded THRs had new  
18 components (stems: 19.6% new vs. 12.9% established; cups: 19.5% new vs. 12.7% established).

19  
20 Multivariable mixed effects logistic regression models (Table 2, unadjusted Table S8) found that patients  
21 <55 years old, compared with those 55-80, had 83% and 31% higher odds of receiving a new rather than  
22 established stem (OR=1.83 95%CI 1.73-1.93, p<0.001) and cup (OR=1.31, 95%CI 1.25-1.37, p<0.001).  
23 Women had 13% lower odds than men of receiving a new stem (OR=0.87, 95%CI 0.84-0.90, p<0.001),  
24 but 6% higher odds of receiving a new cup (OR=1.06, 95%CI 1.03-1.09, p<0.001). There was weak  
25 evidence that people with higher BMI had 10% higher odds of receiving a new stem (OR for  
26 underweight/normal vs. Class II Obese=1.10, 95%CI 1.02-1.19, p=0.011) and weak evidence for the  
27 converse association between BMI and receiving a new cup (e.g. OR for underweight/normal vs. Class II  
28 Obese=0.94, 95%CI 0.89-1.00, p=0.042). Higher ASA grade was associated with 36% lower odds of  
29 receiving new stems (OR for ASA grades 'IV + V' versus 'I' = 0.64, 95%CI 0.46-0.90, p=0.010), but was not  
30 associated with receiving new cups (OR for ASA grades 'IV + V' versus 'I' = 1.02, 95%CI 0.82-1.26,  
31 p=0.881). Patients with private versus NHS funding had nine percent higher odds of receiving new cups  
32 (OR=1.09, 95%CI 1.04-1.14, p<0.001), but there was no association between source of funding and  
33 receiving new stems (OR=1.02, 95%CI 0.95-1.08, p=0.642).

### 34 35 36 37 38 39 40 41 42 43 44 45 46 47 48 49 50 51 *Sensitivity analyses*

52  
53 Results of our first sensitivity analyses (excluding calendar-years for surgeons with <10 THRs) differed  
54 only minimally from our primary analyses (Table S9), indicating that our results were not biased by low-  
55  
56  
57

1  
2  
3 volume surgeons. In our second sensitivity analyses ('consultant in-charge' as the clustering variable)  
4 associations between source of funding and receipt of new stem/cup were stronger, otherwise they  
5 differed only minimally differed from our primary analyses (Table S10 & Table S11). Our comparison of  
6 regression models without BMI as an exposure, with complete cases as defined previously (n=431,955)  
7 and complete cases defined without BMI (n=616,879) found only minor differences. This suggests that  
8 associations between the exposures and outcomes for the population missing BMI differ only slightly  
9 from the population with BMI.  
10  
11  
12  
13  
14  
15  
16  
17

## 18 Discussion

19  
20 Sixty-eight new cups and 72 new stems were first used in THRs in the NJR for OA between 2008 and  
21 2017. Most THRs used components introduced before 2008 but 12% used a new stem or cup. Uptake of  
22 some new implant components was very rapid. Conversely, uptake of a third of new components has  
23 been slow. Most surgeons used a maximum total of seven different cups or stems, of which one or two  
24 were new components. A small number of surgeons used a wide variety of different components,  
25 including new stems, cups and combinations.  
26  
27  
28  
29  
30

31 Strengths of our study include the use of the NJR dataset, the largest arthroplasty register with  
32 comprehensive data capture (>95% in the period studied). This is the first to describe the variation in  
33 factors associated with uptake of new implant components by surgeons and receipt of new components  
34 by patients. Our study has several weaknesses. We classified a component as new based on the first  
35 record of a brand name in the NJR, but this does not exclude the possibility that a component was  
36 introduced earlier to other markets outside the UK. Furthermore, new components may constitute  
37 procedures not uploaded to the NJR (missing primary THRs estimated <5%). Also, some of these  
38 components may be minor modifications or a rebadged/renamed version of an existing component and  
39 some may also cover successive versions of a component. The correct operating surgeon may not be  
40 assigned to every operation. The extent to which this applies is unknown but may result in inaccurate  
41 estimates of surgeon-level associations, although our sensitivity analyses indicate that this is unlikely.  
42 The associations we have reported may be confounded by unmeasured factors (residual confounding)  
43 and in the absence of pre-existing literature on the uptake of new implants the findings from the  
44 regression models should be considered exploratory. We were missing BMI data for some people and  
45 elected not to use multiple imputation to account for these missing data, however our sensitivity  
46  
47  
48  
49  
50  
51  
52  
53  
54  
55  
56  
57  
58  
59  
60

1  
2  
3 analyses suggest that people with BMI data did not differ substantially from those without BMI across  
4 our other measures. Finally, we did not have data on hospital-level factors or regional variation in  
5 suppliers in our analyses, which may be drivers of selection.[15]  
6  
7

8  
9 Approximately 16 new implant components/year (stems and cups) were introduced in the NJR between  
10 2008-2017. Comparisons with Australia (34 implant components/year 2003-2008) [16] and Finland (2-4  
11 components/year 1980-2013) [17] suggest that this rate is not unusual, but that there is large variation  
12 internationally. The rapid uptake of some new components indicates that phased introduction, as  
13 recommended in the IDEAL Framework and others,[18] is unlikely to be happening. It is unclear whether  
14 16 new implant components/year is of itself a good or bad thing. However, a healthcare system which  
15 supported a graduated introduction of new components, where the use of new components is restricted  
16 to specialised centres,[18] would provide a natural limit on the rate of introduction of new components  
17 until satisfactory and robust evidence is generated to support their more widespread use. Conversely, a  
18 third of new implant components have not yet accrued more than ten uses. Postmarket surveillance of  
19 THRs, due to their longevity, performs a safety monitoring role which cannot easily be replaced by pre-  
20 approval clinical data. Since the statistical methods are not applicable to components used in small  
21 numbers collaboration between international arthroplasty registries may allow more effective  
22 monitoring for low-volume components.  
23  
24  
25  
26  
27  
28  
29  
30  
31  
32

33 Over half of surgeons in our study used  $\leq 5$  different stems, cups, or combinations, similar to a median of  
34 two different implant brands reported by surgeons in the USA in 1997.[19] The volume of THRs  
35 performed by surgeons using new components was often low (median  $\leq 3$  THRs with new components  
36 versus median 22 THRs in total), but the proportion of their THRs using any new components varied  
37 from one percent (lower quartile) to 19% (upper quartile). Surgeons who use a wider range of prosthesis  
38 combinations in THRs may have higher revision rates [20] and early THRs performed after switching  
39 implants may have a higher revision risk (a.k.a. 'learning-curve').[21] While this suggests that surgeons  
40 should rely on a narrow range of implant components and rarely switch, a phased introduction of new  
41 implant designs, as is done in Sweden, may mitigate the learning-curve effect.[22] Since there are no  
42 contemporary comparisons of the range of implant components surgeons use and their relative  
43 volumes, it is unclear whether the between-surgeon variation we have reported may be associated with  
44 worse implant survival and warrants further research.  
45  
46  
47  
48  
49  
50  
51  
52  
53

54 We found that newer components were being used in patients likely to be more active (i.e. younger  
55 and/or male patients). There has been increasing evidence that uncemented implants, particularly  
56  
57



1  
2  
3 stems, should not be used in older patients, but some uncertainty remains about their use in young  
4 patients (especially uncemented cups).[23–25] Since the majority of new cups and stems are  
5 uncemented, the decision to use these implant components in younger patients may increase the  
6 already high lifetime risk of revision surgery for these patients. Associations between BMI or ASA grade  
7 and receipt or use of new components were inconsistent between stems and cups and did not provide  
8 clear support for the use of new implant components in patients likely to be more active (i.e. lower BMI  
9 and ASA grades). It may be of interest to further investigate the implant component choices made for  
10 patients with higher BMI or ASA grades.  
11  
12

13  
14  
15  
16  
17 The most comparable previous work used NJR data to explore patient-level and hospital-level  
18 determinants that patients receive uncemented versus cemented implants.[15] Uncemented  
19 components were less likely to be used in women and older patients, and hospitals treating older  
20 patients were less likely to use them. Our results indicate that surgeons who treat a higher proportion of  
21 younger patients are more likely to use newer components. Our most marked finding, that surgeons  
22 who used a wide variety of stem-cup combinations (either established or new) were much more likely to  
23 try a new component, may be somewhat self-evident but suggests that there may be a subset of  
24 surgeons who change components more quickly than their peers. Whether this behaviour, alongside the  
25 previously discussed learning-curve, is related to outcomes of THRs is currently unclear.  
26  
27  
28  
29  
30  
31  
32

33  
34  
35  
36  
37  
38  
39  
40  
41  
42  
43  
44  
45  
46  
47  
48  
49  
50  
51  
52  
53  
54  
55  
56  
57  
58  
59  
60  
Proposals for how new implant components should be introduced have been made previously, largely  
focussed on phased introduction through high-volume centres and surgeons, and reliance on registries  
for long-term monitoring. It seems unlikely that 16 new THR implant components/year, as we found in  
our study, could be sustained through such an approach. Alongside the potential benefits of phased  
introduction discussed elsewhere, this approach would probably reduce the number of implant  
components used only in very low numbers. Since these are not monitored in the same manner as  
higher volume components this would probably be a good thing for patients, providing implant  
components intended for use in specialist cases are not adversely affected.

Further research could build on the findings of this study in several ways. Extending our analysis of  
surgeon-level factors associated with uptake of new components to include factors associated with risk  
of revision after THR would be valuable to surgeons and patients. Specifically, the 'learning curve'  
associated with changing implants and the complex relationship between surgeon's volume and  
outcomes. In addition, widening our study to cover hospital-level factors or regional variation in  
suppliers may highlight other drivers of selection.

## Conclusions

A large number of new THR implant components have been introduced into use in the NJR since 2008. The majority of THRs performed since 2008 used components which have been in use for a long time, but a large number of surgeons have tried new components, with wide variation in how many types and how often they have been used. The impact of this variation on patient outcomes is currently unclear. New rather than established implant components are more likely to be used in patients who are younger and/or male, although whether this will reduce the high lifetime risk of revision for this population is unclear.

## References

- 1 Dreinhöfer KE, Dieppe P, Stürmer T, *et al*. Indications for total hip replacement: Comparison of assessments of orthopaedic surgeons and referring physicians. *Annals of the Rheumatic Diseases* 2006;**65**:1346–50. doi:10.1136/ard.2005.047811
- 2 National Joint Registry for England, Wales and Northern Ireland. 14th Annual Report 2017. 2017.
- 3 National Institute for Health and Care Excellence. Total hip replacement and resurfacing arthroplasty for end-stage arthritis of the hip. NICE 2018.
- 4 Bayliss LE, Culliford D, Monk AP, *et al*. The effect of patient age at intervention on risk of implant revision after total replacement of the hip or knee: a population-based cohort study. *The Lancet* 2017;**389**:1424–30. doi:10.1016/S0140-6736(17)30059-4
- 5 Smith AJ, Dieppe P, Vernon K, *et al*. Failure rates of stemmed metal-on-metal hip replacements: Analysis of data from the National Joint Registry of England and Wales. *The Lancet* 2012;**379**:1199–204. doi:10.1016/S0140-6736(12)60353-5
- 6 de Steiger RN, Hang JR, Miller LN, *et al*. Five-Year Results of the ASR XL Acetabular System and the ASR Hip Resurfacing System. *The Journal of Bone and Joint Surgery-American Volume* 2011;**93**:2287–93. doi:10.2106/JBJS.J.01727
- 7 Reito A, Lehtovirta L, Lainiala O, *et al*. Lack of evidence—the anti-stepwise introduction of metal-on-metal hip replacements. *Acta Orthopaedica* 2017;**88**:478–83. doi:10.1080/17453674.2017.1353794
- 8 Kynaston-Pearson F, Ashmore AM, Malak TT, *et al*. Primary hip replacement prostheses and their evidence base: systematic review of literature. *BMJ* 2013;**347**:f6956. doi:10.1136/bmj.f6956
- 9 López-López JA, Humphriss RL, Beswick AD, *et al*. Choice of implant combinations in total hip replacement: systematic review and network meta-analysis. *BMJ (Clinical research ed)* 2017;**359**:j4651. doi:10.1136/bmj.j4651

- 10 McCulloch P, Altman DG, Campbell WB, *et al.* No surgical innovation without evaluation: the IDEAL recommendations. *The Lancet* 2009;**374**:1105–12. doi:10.1016/S0140-6736(09)61116-8
- 11 Birkmeyer JD, Reames BN, McCulloch P, *et al.* Understanding of regional variation in the use of surgery. *The Lancet* 2013;**382**:1121–9. doi:10.1016/S0140-6736(13)61215-5
- 12 National Joint Registry for England W and NI. Prostheses used in hip, knee, ankle, elbow and shoulder replacement procedures 2016. 2017.
- 13 National Joint Registry for England, Wales and Northern Ireland. Data Completeness and quality. 2018.<http://www.njrreports.org.uk/Data-Completeness-and-quality> (accessed 7 Aug 2019).
- 14 National Joint Registry for England. 15th Annual Report 2018. 2018. <http://www.njrreports.org.uk/Portals/0/PDFdownloads/NJR%2015th%20Annual%20Report%202018.pdf> (accessed 30 Apr 2019).
- 15 Davies C. *An analysis of choice: a case study on hip prostheses.* 2011.
- 16 Anand R, Graves SE, de Steiger RN, *et al.* What Is the Benefit of Introducing New Hip and Knee Prostheses? *The Journal of Bone and Joint Surgery-American Volume* 2011;**93**:51–4. doi:10.2106/JBJS.K.00867
- 17 Peltola M. *Impact of technological change on quality of care: Studies on total hip and knee replacement.* 2016.
- 18 Zywił MG, Johnson AJ, Mont MA. Graduated Introduction of Orthopaedic Implants. *The Journal of Bone & Joint Surgery* 2012;**94**:e158. doi:10.2106/JBJS.K.01675
- 19 Sharkey PF, Sethuraman V, Hozack WJ, *et al.* Factors influencing choice of implants in total hip arthroplasty and total knee arthroplasty: Perspectives of surgeons and patients. *Journal of Arthroplasty* 1999;**14**:281–7. doi:10.1016/S0883-5403(99)90052-9
- 20 Australian Orthopaedic Association. Hip, Knee & Shoulder Arthroplasty: Annual Report 2017. Australian Orthopaedic Association 2017. <https://aoanjrr.sahmri.com/documents/10180/397736/Hip%2C%20Knee%20%26%20Shoulder%20Arthroplasty>
- 21 Peltola M, Malmivaara A, Paavola M. Hip prosthesis introduction and early revision risk. *Acta Orthopaedica* 2013;**84**:25–31. doi:10.3109/17453674.2013.771299
- 22 Mohaddes M, Björk M, Nemes S, *et al.* No increased risk of early revision during the implementation phase of new cup designs: Analysis of 52,903 hip arthroplasties reported to the Swedish Hip Arthroplasty Register. *Acta Orthopaedica* 2016;**87**:31–6. doi:10.1080/17453674.2016.1181818
- 23 Mäkelä KT, Matilainen M, Pulkkinen P, *et al.* Failure rate of cemented and uncemented total hip replacements: Register study of combined Nordic database of four nations. *BMJ (Online)* 2014;**348**:1–10. doi:10.1136/bmj.f7592

- 1  
2  
3 24 Stea S, Comfort T, Sedrakyan A, *et al.* Multinational comprehensive evaluation of the fixation  
4 method used in hip replacement: Interaction with age in context. *Journal of Bone and Joint Surgery -*  
5 *American Volume* 2014;**96**:42–51. doi:10.2106/JBJS.N.00463  
6  
7 25 Hailer NP, Garellick G, Kärrholm J. Uncemented and cemented primary total hip arthroplasty in the  
8 Swedish Hip Arthroplasty Register: Evaluation of 170,413 operations. *Acta Orthopaedica*  
9 2010;**81**:34–41. doi:10.3109/17453671003685400  
10  
11  
12  
13  
14  
15  
16  
17  
18  
19  
20  
21  
22  
23  
24  
25  
26  
27  
28  
29  
30  
31  
32  
33  
34  
35  
36  
37  
38  
39  
40  
41  
42  
43  
44  
45  
46  
47  
48  
49  
50  
51  
52  
53  
54  
55  
56  
57  
58  
59  
60

For peer review only

Table 1 Results from multivariable logistic regression models showing the association between surgeon-level factors and use of new stems and cups

| Exposure                                                                                   | Stems                                  |                               |                 |             |                | Cups                                   |                               |                 |             |                |
|--------------------------------------------------------------------------------------------|----------------------------------------|-------------------------------|-----------------|-------------|----------------|----------------------------------------|-------------------------------|-----------------|-------------|----------------|
|                                                                                            | Established<br>(n=18,404) <sup>3</sup> | New<br>(n=2,006) <sup>3</sup> | OR <sup>1</sup> | (95% CI)    | p <sup>1</sup> | Established<br>(n=17,167) <sup>3</sup> | New<br>(n=3,243) <sup>3</sup> | OR <sup>1</sup> | (95% CI)    | p <sup>1</sup> |
| <b>Proportion of THRs performed on patients &lt;55 years old</b>                           |                                        |                               |                 |             |                |                                        |                               |                 |             |                |
| <10% (ref.)                                                                                | 13,088<br>(71.1%)                      | 940<br>(46.9%)                | 1               | -           | -              | 12,346<br>(71.9%)                      | 1,682<br>(51.9%)              | 1               | -           | -              |
| ≥10%                                                                                       | 5,316<br>(28.9%)                       | 1,066<br>(53.1%)              | 1.47            | 1.30 – 1.66 | <0.001         | 4,821<br>(28.1%)                       | 1,561<br>(48.1%)              | 1.39            | 1.25 – 1.53 | <0.001         |
| <b>Number of THRs performed in calendar year<sup>2</sup><br/>(per 10 additional cases)</b> |                                        |                               |                 |             |                |                                        |                               |                 |             |                |
| 8<br>(2, 24)                                                                               | 8<br>(2, 24)                           | 32<br>(12, 61)                | 1.02            | 0.99 – 1.04 | 0.206          | 7<br>(2, 22)                           | 28<br>(10, 56)                | 1.06            | 1.04 – 1.08 | <0.001         |
| <b>Proportion of THRs funded privately</b>                                                 |                                        |                               |                 |             |                |                                        |                               |                 |             |                |
| 100% NHS funded<br>(ref.)                                                                  | 12,922<br>(70.2%)                      | 966<br>(48.2%)                | 1               | -           | -              | 12,159<br>(70.8%)                      | 1,729<br>(53.3%)              | 1               | -           | -              |
| Some or all funded<br>privately                                                            | 5,482<br>(29.8%)                       | 1,040<br>(51.8%)              | 1.23            | 1.05 – 1.43 | 0.010          | 5,008<br>(29.2%)                       | 1,514<br>(46.7%)              | 1.09            | 0.96 – 1.23 | 0.187          |
| <b>Number of stem-cup combinations used in calendar year</b>                               |                                        |                               |                 |             |                |                                        |                               |                 |             |                |
| ≤3 (ref.)                                                                                  | 14,259<br>(77.5%)                      | 589<br>(29.4%)                | 1               | -           | -              | 13,599<br>(79.2%)                      | 1,249<br>(38.5%)              | 1               | -           | -              |
| 4-6                                                                                        | 3,394<br>(18.4%)                       | 822<br>(41.0%)                | 4.91            | 4.25 – 5.67 | <0.001         | 2,937<br>(17.1%)                       | 1,279<br>(39.4%)              | 3.77            | 3.36 – 4.23 | <0.001         |
| 7-10                                                                                       | 675<br>(3.7%)                          | 468<br>(23.3%)                | 12.5            | 10.1 – 15.4 | <0.001         | 568<br>(3.3%)                          | 575<br>(17.7%)                | 7.21            | 6.01 – 8.67 | <0.001         |

|                                                                      |                   |                  |      |             |        |                   |                  |      |             |        |
|----------------------------------------------------------------------|-------------------|------------------|------|-------------|--------|-------------------|------------------|------|-------------|--------|
| >10                                                                  | 76<br>(0.4%)      | 127<br>(6.3%)    | 27.4 | 17.9 – 41.7 | <0.001 | 63<br>(0.4%)      | 140<br>(4.3%)    | 13.3 | 9.20 – 19.2 | <0.001 |
| <b>Proportion of THRs performed on patients with ASA grade III-V</b> |                   |                  |      |             |        |                   |                  |      |             |        |
| <25% (ref.)                                                          | 13,244<br>(72.0%) | 1,554<br>(77.5%) | 1    | -           | -      | 12,362<br>(72.0%) | 2,436<br>(75.1%) | 1    | -           | -      |
| ≥25%                                                                 | 5,160<br>(28.0%)  | 452<br>(22.5%)   | 1.01 | 0.89 – 1.16 | 0.843  | 4,805<br>(28.0%)  | 807<br>(24.9%)   | 1.12 | 1.01 – 1.25 | 0.034  |

1 – odds ratios, 95% confidence intervals and p-values are from logistic regression models adjusted for all exposure variables, 2 - median (lower to upper quartile), 3 - proportions displayed are based on surgeon-calendar years

Table 2 Results from multivariable mixed-effects regression models (patients nested within surgeons) of age, gender, categorised BMI, ASA grade and source of funding on stem age and cup age, with category proportions

|                               | Stems                      |                   |                 |             |        | Cups                       |                   |                 |             |        |
|-------------------------------|----------------------------|-------------------|-----------------|-------------|--------|----------------------------|-------------------|-----------------|-------------|--------|
|                               | Established<br>(n=418,831) | New<br>(n=13,124) | OR <sup>1</sup> | (95% CI)    | p      | Established<br>(n=406,072) | New<br>(n=25,883) | OR <sup>1</sup> | (95% CI)    | p      |
| <b>Age</b>                    |                            |                   |                 |             |        |                            |                   |                 |             |        |
| <55 years old                 | 43,780<br>(10.5%)          | 2,793<br>(21.3%)  | 1.83            | 1.73 – 1.93 | <0.001 | 42,752<br>(10.5%)          | 3,821<br>(14.8%)  | 1.31            | 1.25 – 1.37 | <0.001 |
| 55 to 80 (ref.)               | 312,205<br>(74.5%)         | 9,246<br>(70.5%)  | 1               | -           | -      | 302,823<br>(74.6%)         | 18,628<br>(72.0%) | 1               | -           | -      |
| ≥ 80 years old                | 62,846<br>(15.0%)          | 1,085<br>(8.3%)   | 0.60            | 0.56 – 0.64 | <0.001 | 60,497<br>(14.9%)          | 3,434<br>(13.3%)  | 0.91            | 0.87 – 0.95 | <0.001 |
| <b>Gender</b>                 |                            |                   |                 |             |        |                            |                   |                 |             |        |
| Male (ref.)                   | 165,607<br>(39.5%)         | 5,768<br>(44.0%)  | 1               | -           | -      | 161,248<br>(39.7%)         | 10,127<br>(39.1%) | 1               | -           | -      |
| Female                        | 253,224<br>(60.5%)         | 7,356<br>(56.0%)  | 0.87            | 0.84 – 0.90 | <0.001 | 244,824<br>(60.3%)         | 15,756<br>(60.9%) | 1.06            | 1.03 – 1.09 | <0.001 |
| <b>BMI</b>                    |                            |                   |                 |             |        |                            |                   |                 |             |        |
| Underweight and normal (ref.) | 95,306<br>(22.8%)          | 2,911<br>(22.2%)  | 1               | -           | -      | 91,863<br>(22.6%)          | 6,354<br>(24.5%)  | 1               | -           | -      |
| Overweight                    | 165,849<br>(39.6%)         | 5,138<br>(39.1%)  | 1.02            | 0.97 – 1.08 | 0.373  | 160,834<br>(39.6%)         | 10,153<br>(39.2%) | 0.95            | 0.91 – 0.99 | 0.007  |
| Class I Obese                 | 105,670<br>(25.2%)         | 3,391<br>(25.8%)  | 1.06            | 1.00 – 1.12 | 0.067  | 102,781<br>(25.3%)         | 6,280<br>(24.3%)  | 0.93            | 0.90 – 0.97 | 0.001  |
| Class II Obese                | 38,995<br>(9.3%)           | 1,276<br>(9.7%)   | 1.10            | 1.02 – 1.19 | 0.011  | 37,977<br>(9.4%)           | 2,294<br>(8.9%)   | 0.94            | 0.89 – 1.00 | 0.042  |
| Class III Obese               | 13,011<br>(3.1%)           | 408<br>(3.1%)     | 0.99            | 0.87 – 1.11 | 0.808  | 12,617<br>(3.1%)           | 802<br>(3.1%)     | 0.94            | 0.86 – 1.02 | 0.135  |
| <b>ASA grade</b>              |                            |                   |                 |             |        |                            |                   |                 |             |        |
| I (ref.)                      | 60,022<br>(14.3%)          | 2,661<br>(20.3%)  | 1               | -           | -      | 58,265<br>(14.3%)          | 4,418<br>(17.1%)  | 1               | -           | -      |
| II                            | 293,142<br>(70.0%)         | 8,940<br>(68.1%)  | 0.81            | 0.77 – 0.86 | <0.001 | 284,437<br>(70.0%)         | 17,645<br>(68.2%) | 0.98            | 0.95 – 1.03 | 0.461  |

|                          |                    |                   |      |             |        |                    |                   |      |             |        |
|--------------------------|--------------------|-------------------|------|-------------|--------|--------------------|-------------------|------|-------------|--------|
| III                      | 63,904<br>(15.3%)  | 1,482<br>(11.3%)  | 0.66 | 0.61 – 0.72 | <0.001 | 61,681<br>(15.2%)  | 3,705<br>(14.3%)  | 1.00 | 0.94 – 1.05 | 0.935  |
| IV + V                   | 1,763<br>(0.4%)    | 41<br>(0.3%)      | 0.64 | 0.46 – 0.90 | 0.010  | 1,689<br>(0.4%)    | 115<br>(0.4%)     | 1.02 | 0.82 – 1.26 | 0.881  |
| <b>Source of funding</b> |                    |                   |      |             |        |                    |                   |      |             |        |
| NHS                      | 364,928<br>(87.1%) | 10,553<br>(80.4%) | 1    | -           | -      | 354,642<br>(87.3%) | 20,839<br>(80.5%) | 1    | -           | -      |
| Private                  | 53,903<br>(12.9%)  | 2,571<br>(19.6%)  | 1.02 | 0.95 – 1.08 | 0.642  | 51,430<br>(12.7%)  | 5,044<br>(19.5%)  | 1.09 | 1.04 – 1.14 | <0.001 |

1 – odds ratios, 95% confidence intervals and p-values are from mixed-effects logistic regression models adjusted for all exposure variables



1  
2  
3  
4  
5  
6  
7  
8  
9  
10  
11  
12  
13  
14  
15  
16  
17  
18  
19  
20  
21  
22  
23  
24  
25  
26  
27  
28  
29  
30  
31  
32  
33  
34  
35  
36  
37  
38  
39  
40  
41  
42  
43  
44  
45  
46  
47

Figure 1 Cumulative total use of the top 5 new stems and cups/shells by days since they were introduced

For peer review only

1  
2  
3  
4  
5  
6  
7  
8  
9  
10  
11  
12  
13  
14  
15  
16  
17  
18  
19  
20  
21  
22  
23  
24  
25  
26  
27  
28  
29  
30  
31  
32  
33  
34  
35  
36  
37  
38  
39  
40  
41  
42  
43  
44  
45  
46  
47  
48  
49  
50  
51  
52  
53  
54  
55  
56  
57  
58  
59  
60

For peer review only

1  
2  
3  
4  
5  
6  
7  
8  
9  
10  
11  
12  
13  
14  
15  
16  
17  
18  
19  
20  
21  
22  
23  
24  
25  
26  
27  
28  
29  
30  
31  
32  
33  
34  
35  
36  
37  
38  
39  
40  
41  
42  
43  
44  
45  
46  
47  
48  
49  
50  
51  
52  
53  
54  
55  
56  
57  
58  
59  
60

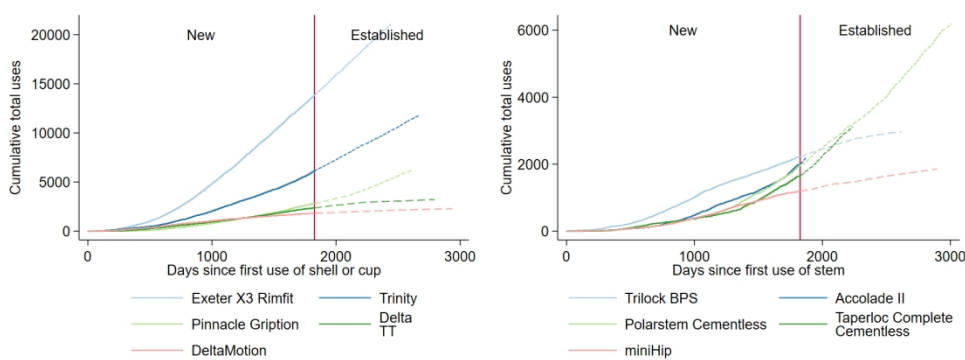

Figure 1 Cumulative total use of the top 5 new stems and cups/shells by days since they were introduced  
674x269mm (72 x 72 DPI)

## Supplementary material

Table S1 Uptake of new cups first used between January 1<sup>st</sup> 2008 and 26<sup>th</sup> February 2017

| Cup/shell brand                    | UC <sup>1</sup> | Patients      | Percent      | Surgeons   | Month first used |
|------------------------------------|-----------------|---------------|--------------|------------|------------------|
| <b>Exeter X3 Rimfit</b>            |                 | <b>13,821</b> | <b>38.5%</b> | <b>781</b> | <b>Jun 2010</b>  |
| <b>Trinity</b>                     | ✓               | <b>6,133</b>  | <b>17.1%</b> | <b>197</b> | <b>Nov 2009</b>  |
| <b>Pinnacle Gription</b>           | ✓               | <b>2,817</b>  | <b>7.9%</b>  | <b>375</b> | <b>Dec 2009</b>  |
| <b>Delta TT</b>                    | ✓               | <b>2,368</b>  | <b>6.6%</b>  | <b>145</b> | <b>Jun 2009</b>  |
| <b>DeltaMotion</b>                 | ✓               | <b>1,823</b>  | <b>5.1%</b>  | <b>152</b> | <b>Feb 2009</b>  |
| Versafit CC Trio                   | ✓               | 1,442         | 4.0%         | 47         | Mar 2011         |
| RM Pressfit Vitamys                | ✓               | 731           | 2.0%         | 33         | Aug 2011         |
| G7 Cementless Acetabular Component | ✓               | 621           | 1.7%         | 36         | Aug 2014         |
| AEON Cemented Acetabular Cup       |                 | 568           | 1.6%         | 43         | Sep 2011         |
| Exceed ABT Cemented                |                 | 556           | 1.5%         | 57         | Jun 2011         |
| Plasmafit Cementless Cup           | ✓               | 546           | 1.5%         | 50         | Nov 2012         |
| Duracel                            |                 | 465           | 1.3%         | 45         | Mar 2013         |
| Allofit IT                         | ✓               | 367           | 1.0%         | 19         | Jan 2010         |
| ADES Cemented                      |                 | 342           | 1.0%         | 72         | Feb 2014         |
| XLFit Acetabular Cup               | ✓               | 293           | 0.8%         | 56         | Apr 2015         |
| Regenerex Ringloc+                 | ✓               | 220           | 0.6%         | 55         | Feb 2009         |
| April - Polyethylene               | ✓               | 214           | 0.6%         | 33         | Jan 2012         |
| ADES                               | ✓               | 205           | 0.6%         | 39         | May 2014         |
| Delta PF                           | ✓               | 198           | 0.6%         | 9          | Mar 2011         |
| MIHR Cup                           | ✓               | 197           | 0.5%         | 12         | Mar 2008         |
| RM Pressfit                        | ✓               | 184           | 0.5%         | 24         | May 2008         |
| Tribofit                           | ✓               | 174           | 0.5%         | 9          | Jul 2010         |
| seleXys TH+                        | ✓               | 174           | 0.5%         | 13         | Nov 2008         |
| OptiCup CEP                        |                 | 147           | 0.4%         | 18         | Nov 2014         |
| Delta One TT                       | ✓               | 129           | 0.4%         | 61         | Jun 2010         |
| Gyros                              | ✓               | 129           | 0.4%         | 28         | Jan 2010         |
| Restoration ADM Cup                | ✓               | 127           | 0.4%         | 31         | May 2011         |
| EcoFit Cementless Cup              | ✓               | 102           | 0.3%         | 5          | Feb 2013         |
| Novation                           | ✓               | 93            | 0.3%         | 10         | Nov 2009         |
| Allofit-S IT                       | ✓               | 91            | 0.3%         | 21         | Aug 2010         |
| M2A Magnum                         | ✓               | 79            | 0.2%         | 30         | Feb 2008         |
| Freedom                            |                 | 75            | 0.2%         | 17         | May 2008         |
| Captiv DM                          | ✓               | 68            | 0.2%         | 8          | Aug 2011         |
| Trident Constrained Cup            |                 | 65            | 0.2%         | 30         | Jan 2008         |

|    |                        |   |        |      |    |          |
|----|------------------------|---|--------|------|----|----------|
| 1  |                        |   |        |      |    |          |
| 2  |                        |   |        |      |    |          |
| 3  | seleXys DS Cementless  | ✓ | 56     | 0.2% | 16 | Mar 2014 |
| 4  | MMC Resurfacing        | ✓ | 36     | 0.1% | 10 | Aug 2009 |
| 5  | ASR 300 Cup            | ✓ | 36     | 0.1% | 1  | Jan 2009 |
| 6  | MPACT                  | ✓ | 25     | 0.1% | 8  | Dec 2011 |
| 7  | Restoration Gap2       |   | 23     | 0.1% | 14 | Mar 2008 |
| 8  | Fixa Ti-Por            | ✓ | 20     | 0.1% | 4  | Apr 2014 |
| 9  | seleXys DS Cemented    |   | 20     | 0.1% | 12 | Feb 2014 |
| 10 | Fixa Duplex            | ✓ | 17     | 0.0% | 1  | Mar 2016 |
| 11 | Cormet Prime           | ✓ | 12     | 0.0% | 5  | Jan 2010 |
| 12 | Delta Revision TT      | ✓ | 9      | 0.0% | 6  | Nov 2010 |
| 13 | Equateur               | ✓ | 9      | 0.0% | 5  | Jul 2008 |
| 14 | U-Motion II            | ✓ | 8      | 0.0% | 4  | Apr 2016 |
| 15 | A Class                |   | 7      | 0.0% | 3  | Feb 2009 |
| 16 | Zimmer Cemented Cup    |   | 6      | 0.0% | 4  | May 2013 |
| 17 | Regenerex Revision     | ✓ | 4      | 0.0% | 3  | Jan 2009 |
| 18 | Capitole C             |   | 3      | 0.0% | 3  | Jan 2013 |
| 19 | Sirius Cementless Cup  | ✓ | 3      | 0.0% | 2  | Aug 2011 |
| 20 | Horizon                | ✓ | 3      | 0.0% | 2  | Jul 2008 |
| 21 | 2M Dual Mobility       | ✓ | 3      | 0.0% | 2  | Nov 2012 |
| 22 | Par-5                  | ✓ | 3      | 0.0% | 3  | Jan 2008 |
| 23 | Solution Cemented Cup  |   | 2      | 0.0% | 1  | Dec 2015 |
| 24 | J-Loc                  | ✓ | 2      | 0.0% | 2  | Mar 2013 |
| 25 | XPE Cup                |   | 2      | 0.0% | 1  | Jun 2016 |
| 26 | Evidence               |   | 2      | 0.0% | 1  | Oct 2014 |
| 27 | FIXA Duplex Cemented   |   | 1      | 0.0% | 1  | Jan 2017 |
| 28 | Endurance Cemented Cup |   | 1      | 0.0% | 1  | Oct 2016 |
| 29 | Mitre Cup              |   | 1      | 0.0% | 1  | Nov 2013 |
| 30 | Capitole T             | ✓ | 1      | 0.0% | 1  | Nov 2014 |
| 31 | Polymax                | ✓ | 1      | 0.0% | 1  | Oct 2016 |
| 32 | Ringloc                | ✓ | 1      | 0.0% | 1  | Jan 2011 |
| 33 | Charnley KS            |   | 1      | 0.0% | 1  | Jul 2011 |
| 34 | Arden                  |   | 1      | 0.0% | 1  | Feb 2008 |
| 35 | Versacem               |   | 1      | 0.0% | 1  | Oct 2009 |
| 36 | Versafit DM            | ✓ | 1      | 0.0% | 1  | May 2008 |
| 37 |                        |   |        |      |    |          |
| 38 |                        |   |        |      |    |          |
| 39 |                        |   |        |      |    |          |
| 40 |                        |   |        |      |    |          |
| 41 |                        |   |        |      |    |          |
| 42 |                        |   |        |      |    |          |
| 43 |                        |   |        |      |    |          |
| 44 |                        |   |        |      |    |          |
| 45 |                        |   |        |      |    |          |
| 46 |                        |   |        |      |    |          |
| 47 |                        |   |        |      |    |          |
| 48 |                        |   |        |      |    |          |
| 49 | Total                  |   | 35,885 |      |    |          |
| 50 |                        |   |        |      |    |          |
| 51 |                        |   |        |      |    |          |
| 52 |                        |   |        |      |    |          |
| 53 |                        |   |        |      |    |          |
| 54 |                        |   |        |      |    |          |
| 55 |                        |   |        |      |    |          |
| 56 |                        |   |        |      |    |          |
| 57 |                        |   |        |      |    |          |
| 58 |                        |   |        |      |    |          |
| 59 |                        |   |        |      |    |          |
| 60 |                        |   |        |      |    |          |

1 – Uncemented fixation, Rows in **bold** = five most commonly used new cups

Table S2 Uptake of new stems first used between January 1<sup>st</sup> 2008 and 26<sup>th</sup> February 2017

| Stem brand                               | UC <sup>1</sup> | Patients     | Percent      | Surgeons   | Month first used |
|------------------------------------------|-----------------|--------------|--------------|------------|------------------|
| <b>Trilock BPS</b>                       | ✓               | <b>2,232</b> | <b>12.3%</b> | <b>121</b> | <b>Dec 2009</b>  |
| <b>Accolade II</b>                       | ✓               | <b>1,997</b> | <b>11.0%</b> | <b>165</b> | <b>Jan 2012</b>  |
| <b>Polarstem Cementless</b>              | ✓               | <b>1,969</b> | <b>10.8%</b> | <b>93</b>  | <b>Dec 2008</b>  |
| <b>Taperloc Complete Cementless Stem</b> | ✓               | <b>1,658</b> | <b>9.1%</b>  | <b>104</b> | <b>Jan 2011</b>  |
| <b>miniHip</b>                           | ✓               | <b>1,193</b> | <b>6.6%</b>  | <b>79</b>  | <b>Mar 2009</b>  |
| Metafix Stem                             | ✓               | 1,171        | 6.4%         | 93         | Feb 2008         |
| AMiStem-H                                | ✓               | 1,003        | 5.5%         | 32         | Aug 2009         |
| Exeter No.1 125mm stem Line Extension    |                 | 836          | 4.6%         | 211        | Aug 2014         |
| TriFit TS hip stem                       | ✓               | 684          | 3.8%         | 44         | Sep 2012         |
| Aeon Cemented Stem                       |                 | 673          | 3.7%         | 50         | Sep 2011         |
| SPS Evolution                            | ✓               | 654          | 3.6%         | 48         | Jan 2012         |
| C-Stem AMT Line Extension                |                 | 428          | 2.4%         | 127        | Jul 2013         |
| H-Max S Monoblock Stem                   | ✓               | 401          | 2.2%         | 34         | May 2010         |
| H-Max M Modular Stem                     | ✓               | 316          | 1.7%         | 20         | Mar 2010         |
| Finsbury Type C                          | ✓               | 302          | 1.7%         | 39         | Aug 2008         |
| EcoFit Cementless Stem                   | ✓               | 240          | 1.3%         | 11         | Sep 2010         |
| Silent                                   | ✓               | 199          | 1.1%         | 17         | Feb 2008         |
| Metha Monoblock Stem                     | ✓               | 195          | 1.1%         | 25         | Aug 2011         |
| Corail Cemented                          |                 | 170          | 0.9%         | 32         | Apr 2009         |
| OptiStem                                 |                 | 165          | 0.9%         | 22         | Nov 2014         |
| Trilliance                               |                 | 156          | 0.9%         | 10         | Jul 2011         |
| Sirius stem                              |                 | 138          | 0.8%         | 10         | Apr 2014         |
| Profemur L Classic                       | ✓               | 132          | 0.7%         | 17         | Mar 2014         |
| Profemur TL                              | ✓               | 120          | 0.7%         | 23         | Jan 2008         |
| AMiStem-C                                |                 | 110          | 0.6%         | 3          | Jul 2012         |
| Master SL                                | ✓               | 102          | 0.6%         | 8          | Jul 2013         |
| Corail Revision Stem                     | ✓               | 92           | 0.5%         | 69         | Jul 2010         |
| Novation Element Stem                    | ✓               | 90           | 0.5%         | 9          | Nov 2009         |
| CBC Evolution                            | ✓               | 83           | 0.5%         | 8          | Jan 2013         |
| Nanos                                    | ✓               | 78           | 0.4%         | 5          | Dec 2011         |
| Amoda                                    | ✓               | 67           | 0.4%         | 1          | Apr 2010         |
| Harmony Modular                          | ✓               | 65           | 0.4%         | 6          | Mar 2010         |
| ABG II Cementless Stem                   | ✓               | 52           | 0.3%         | 9          | Apr 2009         |
| SL                                       | ✓               | 51           | 0.3%         | 5          | Sep 2009         |
| XActa                                    |                 | 47           | 0.3%         | 5          | Jan 2014         |
| Avenir Muller Cementless                 | ✓               | 33           | 0.2%         | 6          | Jun 2016         |
| Harmony Cemented                         |                 | 25           | 0.1%         | 8          | Feb 2014         |

|    |                              |   |               |      |    |          |
|----|------------------------------|---|---------------|------|----|----------|
| 1  |                              |   |               |      |    |          |
| 2  |                              |   |               |      |    |          |
| 3  |                              |   |               |      |    |          |
| 4  | miniMax                      | ✓ | 24            | 0.1% | 2  | Apr 2011 |
| 5  | SMS                          | ✓ | 22            | 0.1% | 2  | Jul 2015 |
| 6  | FTS                          | ✓ | 20            | 0.1% | 5  | Feb 2009 |
| 7  | Profemur TL Classic          | ✓ | 19            | 0.1% | 5  | Jan 2016 |
| 8  | SMF                          | ✓ | 17            | 0.1% | 1  | Oct 2011 |
| 9  | Profemur Preserve            | ✓ | 12            | 0.1% | 5  | Feb 2012 |
| 10 | AMiStem HP                   | ✓ | 12            | 0.1% | 1  | Dec 2015 |
| 11 | METS Cemented                |   | 12            | 0.1% | 10 | Dec 2012 |
| 12 | GMRS                         |   | 11            | 0.1% | 9  | Aug 2012 |
| 13 | Harmony Cementless           | ✓ | 10            | 0.1% | 4  | Apr 2011 |
| 14 | UCP Stem                     |   | 10            | 0.1% | 5  | Apr 2016 |
| 15 | Echelon Cemented Stem        |   | 8             | 0.0% | 6  | Mar 2008 |
| 16 | Exception Cementless         | ✓ | 6             | 0.0% | 3  | Feb 2010 |
| 17 | METS Cementless              | ✓ | 5             | 0.0% | 5  | Feb 2013 |
| 18 | Novation Stem                | ✓ | 5             | 0.0% | 2  | Mar 2014 |
| 19 | G2 Cementless Stem           | ✓ | 5             | 0.0% | 5  | Dec 2013 |
| 20 | Securus                      | ✓ | 4             | 0.0% | 4  | Dec 2009 |
| 21 | Profemur Gladiator           | ✓ | 4             | 0.0% | 3  | Mar 2010 |
| 22 | Arcad Cementless             | ✓ | 4             | 0.0% | 4  | Sep 2010 |
| 23 | Euros Cementless             | ✓ | 3             | 0.0% | 2  | Aug 2011 |
| 24 | Atlantis                     | ✓ | 3             | 0.0% | 3  | Dec 2011 |
| 25 | Quadra-C                     |   | 3             | 0.0% | 2  | Oct 2009 |
| 26 | Restoration Cemented Stem    |   | 1             | 0.0% | 1  | Feb 2014 |
| 27 | Wagner Revision Stem         | ✓ | 1             | 0.0% | 1  | Apr 2016 |
| 28 | Initiale Cemented Stem       |   | 1             | 0.0% | 1  | Jul 2008 |
| 29 | Integrale                    | ✓ | 1             | 0.0% | 1  | Jun 2009 |
| 30 | optimys                      | ✓ | 1             | 0.0% | 1  | Feb 2017 |
| 31 | Prodigy                      | ✓ | 1             | 0.0% | 1  | Jul 2010 |
| 32 | CDH Stem                     | ✓ | 1             | 0.0% | 1  | Nov 2012 |
| 33 | Friendly                     |   | 1             | 0.0% | 1  | Jul 2012 |
| 34 | Regulus Cemented Stem        |   | 1             | 0.0% | 1  | Oct 2016 |
| 35 | Arcad Cemented               |   | 1             | 0.0% | 1  | Feb 2009 |
| 36 | Endurance Cemented Stem      |   | 1             | 0.0% | 1  | Sep 2013 |
| 37 | Furlong HAC Hemiarthroplasty | ✓ | 1             | 0.0% | 1  | Oct 2010 |
| 38 | C2 Stem                      | ✓ | 1             | 0.0% | 1  | Feb 2015 |
| 39 |                              |   |               |      |    |          |
| 40 |                              |   |               |      |    |          |
| 41 |                              |   |               |      |    |          |
| 42 |                              |   |               |      |    |          |
| 43 |                              |   |               |      |    |          |
| 44 |                              |   |               |      |    |          |
| 45 |                              |   |               |      |    |          |
| 46 |                              |   |               |      |    |          |
| 47 | <b>Total</b>                 |   | <b>18,159</b> |      |    |          |
| 48 |                              |   |               |      |    |          |

1 – Uncemented fixation, Rows in **bold** = five most commonly used new stems

Table S3 Number of different post-2008 shells/cups used by surgeons

| Number of new cups used | Number of surgeons | Percent | Cumulative percent |
|-------------------------|--------------------|---------|--------------------|
| 1                       | 1,113              | 65.5%   | 65.5%              |
| 2                       | 351                | 20.7%   | 86.2%              |
| 3                       | 138                | 8.1%    | 94.3%              |
| 4                       | 61                 | 3.6%    | 97.9%              |
| 5                       | 18                 | 1.1%    | 98.9%              |
| 6                       | 8                  | 0.5%    | 99.4%              |
| 7                       | 9                  | 0.5%    | 99.9%              |
| 10                      | 1                  | 0.1%    | 100.0%             |
| <b>Total</b>            | <b>1,699</b>       |         |                    |



*Table S4 Number of different post-2008 stems used by surgeons*

| <b>Number of new stems used</b> | <b>Number of surgeons</b> | <b>Percent</b> | <b>Cumulative percent</b> |
|---------------------------------|---------------------------|----------------|---------------------------|
| 1                               | 771                       | 69.4%          | 69.4%                     |
| 2                               | 210                       | 18.9%          | 88.3%                     |
| 3                               | 77                        | 6.9%           | 95.2%                     |
| 4                               | 33                        | 3.0%           | 98.2%                     |
| 5                               | 9                         | 0.8%           | 99.0%                     |
| 6                               | 8                         | 0.7%           | 99.7%                     |
| 7                               | 1                         | 0.1%           | 99.8%                     |
| 8                               | 2                         | 0.2%           | 100.0%                    |
| <b>Total</b>                    | <b>1,111</b>              |                |                           |

Table S5 The number of unique new stem-cup combinations used simultaneously by surgeons

| Stem-cup combinations | Number of surgeons | Percent     | Cumulative percent |
|-----------------------|--------------------|-------------|--------------------|
| 1                     | 311                | 71.8%       | 71.8%              |
| 2                     | 78                 | 18.0%       | 89.8%              |
| 3                     | 22                 | 5.1%        | 94.9%              |
| 4                     | 10                 | 2.3%        | 97.2%              |
| 5                     | 5                  | 1.2%        | 98.4%              |
| 6                     | 2                  | 0.5%        | 98.9%              |
| 7                     | 1                  | 0.2%        | 99.1%              |
| 8                     | 2                  | 0.5%        | 99.5%              |
| 9                     | 2                  | 0.5%        | 100.0%             |
| <b>Total</b>          | <b>433</b>         | <b>100%</b> |                    |

1  
2  
3  
4  
5  
6  
7  
8  
9  
10  
11  
12  
13  
14  
15  
16  
17  
18  
19  
20  
21  
22  
23  
24  
25  
26  
27  
28  
29  
30  
31  
32  
33  
34  
35  
36  
37  
38  
39  
40  
41  
42  
43  
44  
45  
46  
47

Table S6 A comparison of people with complete data and those missing some data

|                          | Incomplete<br>(n=186,438) | Complete<br>(n=431,995) | P*     |
|--------------------------|---------------------------|-------------------------|--------|
| <b>Age</b>               |                           |                         |        |
| <55 years old            | 19,561 (10.5%)            | 46,573 (10.8%)          | <0.001 |
| 55 to 80                 | 136,370 (73.1%)           | 321,451 (74.4%)         |        |
| ≥ 80 years old           | 30,507 (16.4%)            | 63,931 (14.8%)          |        |
| <b>Gender</b>            |                           |                         |        |
| Male                     | 71,676 (38.4%)            | 171,375 (39.7%)         | <0.001 |
| Female                   | 114,762 (61.6%)           | 260,580 (60.3%)         |        |
| <b>BMI</b>               |                           |                         |        |
| Underweight and normal   | 31 (23.8%)                | 98,217 (22.7%)          | 0.097  |
| Overweight               | 43 (33.1%)                | 170,987 (39.6%)         |        |
| Class I Obese            | 33 (25.4%)                | 109,061 (25.2%)         |        |
| Class II Obese           | 14 (10.8%)                | 40,271 (9.3%)           |        |
| Class III Obese          | 9 (6.9%)                  | 13,419 (3.1%)           |        |
| <b>ASA grade</b>         |                           |                         |        |
| I                        | 24,893 (13.4%)            | 62,683 (14.5%)          | <0.001 |
| II                       | 130,223 (69.8%)           | 302,082 (69.9%)         |        |
| III                      | 30,180 (16.2%)            | 65,386 (15.1%)          |        |
| IV + V                   | 1,142 (0.6%)              | 1,804 (0.4%)            |        |
| <b>Source of funding</b> |                           |                         |        |
| NHS                      | 165,394 (89.4%)           | 375,481 (86.9%)         | <0.001 |
| Private                  | 19,530 (10.6%)            | 5,6474 (13.1%)          |        |

\*- P-values from chi square tests

Table S7 Results from unadjusted logistic regression models showing the association between surgeon-level factors and use of new versus old stems and cups

| Exposure                                                                                   | Stems           |             |        | Cups            |             |        |
|--------------------------------------------------------------------------------------------|-----------------|-------------|--------|-----------------|-------------|--------|
|                                                                                            | OR <sup>1</sup> | (95% CI)    | p      | OR <sup>1</sup> | (95% CI)    | p      |
| <b>Proportion of THRs performed on patients &lt;55 years old</b>                           |                 |             |        |                 |             |        |
| <10% (ref.)                                                                                | 1               | -           | -      | 1               | -           | -      |
| ≥10%                                                                                       | 2.79            | 2.49 – 3.13 | <0.001 | 2.38            | 2.16 – 2.62 | <0.001 |
| <b>Number of THRs performed in calendar year<sup>2</sup><br/>(per 10 additional cases)</b> |                 |             |        |                 |             |        |
|                                                                                            | 1.19            | 1.16 – 1.22 | <0.001 | 1.20            | 1.18 – 1.23 | <0.001 |
| <b>Proportion of THRs funded privately</b>                                                 |                 |             |        |                 |             |        |
| 100% NHS funded (ref.)                                                                     | 1               | -           | -      | 1               | -           | -      |
| Some or all funded privately                                                               | 2.54            | 2.21 – 2.91 | <0.001 | 2.13            | 1.90 – 2.37 | <0.001 |
| <b>Number of stem-cup combinations used in calendar year</b>                               |                 |             |        |                 |             |        |
| ≤3 (ref.)                                                                                  | 1               | -           | -      | 1               | -           | -      |
| 4-6                                                                                        | 5.86            | 5.16 – 6.66 | <0.001 | 4.74            | 4.27 – 5.26 | <0.001 |
| 7-10                                                                                       | 16.8            | 14.1 – 20.0 | <0.001 | 11.0            | 9.39 – 12.9 | <0.001 |
| >10                                                                                        | 40.5            | 27.2 – 60.1 | <0.001 | 21.2            | 17.1 – 34.2 | <0.001 |
| <b>Proportion of THRs performed on patients with ASA grade III-V</b>                       |                 |             |        |                 |             |        |
| <25% (ref.)                                                                                | 1               | -           | -      | 1               | -           | -      |
| ≥25%                                                                                       | 0.75            | 0.66 – 0.85 | <0.001 | 0.85            | 0.77 – 0.95 | 0.003  |

1 – odds ratios, 95% confidence intervals and p-values are from unadjusted logistic regression models

1  
2  
3  
4  
5  
6  
7  
8  
9  
10  
11  
12  
13  
14  
15  
16  
17  
18  
19  
20  
21  
22  
23  
24  
25  
26  
27  
28  
29  
30  
31  
32  
33  
34  
35  
36  
37  
38  
39  
40  
41  
42  
43  
44  
45  
46  
47

Table S8 Results from unadjusted mixed-effects regression models (patients nested within surgeons) of age, gender, categorised BMI, ASA grade, and source of funding on stem and cup age

|                               | Stems           |             |        | Cups            |             |        |
|-------------------------------|-----------------|-------------|--------|-----------------|-------------|--------|
|                               | OR <sup>1</sup> | (95% CI)    | p      | OR <sup>1</sup> | (95% CI)    | p      |
| <b>Age (years)</b>            |                 |             |        |                 |             |        |
| <55 years old                 | 1.95            | 1.85 – 2.05 | <0.001 | 1.31            | 1.25 – 1.36 | <0.001 |
| 55 to 80 (ref.)               | 1               | -           | -      | 1               | -           | -      |
| ≥ 80 years old                | 0.56            | 0.52 – 0.60 | <0.001 | 0.93            | 0.89 – 0.97 | <0.001 |
| <b>Gender</b>                 |                 |             |        |                 |             |        |
| Male (ref.)                   | 1               | -           | -      | 1               | -           | -      |
| Female                        | 0.83            | 0.80 – 0.86 | <0.001 | 1.05            | 1.02 – 1.08 | 0.001  |
| <b>BMI</b>                    |                 |             |        |                 |             |        |
| Underweight and normal (ref.) | 1               | -           | -      | 1               | -           | -      |
| Overweight                    | 1.06            | 1.01 – 1.12 | 0.017  | 0.94            | 0.91 – 0.98 | 0.001  |
| Class I Obese                 | 1.12            | 1.06 – 1.18 | <0.001 | 0.93            | 0.90 – 0.97 | 0.001  |
| Class II Obese                | 1.18            | 1.09 – 1.27 | <0.001 | 0.96            | 0.90 – 1.01 | 0.123  |
| Class III Obese               | 1.04            | 0.93 – 1.17 | 0.513  | 0.97            | 0.89 – 1.05 | 0.456  |
| <b>ASA grade</b>              |                 |             |        |                 |             |        |
| I (ref.)                      | 1               | -           | -      | 1               | -           | -      |
| II                            | 0.69            | 0.65 – 0.72 | <0.001 | 0.92            | 0.88 – 0.96 | <0.001 |
| III                           | 0.51            | 0.48 – 0.55 | <0.001 | 0.90            | 0.86 – 0.95 | <0.001 |
| IV + V                        | 0.47            | 0.33 – 0.65 | <0.001 | 0.91            | 0.74 – 1.13 | 0.390  |
| <b>Source of funding</b>      |                 |             |        |                 |             |        |
| NHS                           | 1               | -           | -      | 1               | -           | -      |
| Private                       | 1.01            | 0.95 – 1.07 | 0.777  | 1.08            | 1.03 – 1.13 | 0.001  |

1 – odds ratios, 95% confidence intervals and p-values are from unadjusted mixed-effects logistic regression models

Table S9 Sensitivity analysis 1: Results from multivariable logistic regression models showing the association between surgeon-level factors and use of new versus old stems and cups, excluding surgeon calendar-years with <10 THRs

| Exposure                                                                                   | Stems           |             |        | Cups            |             |        |
|--------------------------------------------------------------------------------------------|-----------------|-------------|--------|-----------------|-------------|--------|
|                                                                                            | OR <sup>1</sup> | (95% CI)    | p      | OR <sup>1</sup> | (95% CI)    | p      |
| <b>Proportion of THRs performed on patients &lt;55 years old</b>                           |                 |             |        |                 |             |        |
| <10% (ref.)                                                                                | 1               | -           | -      | 1               | -           | -      |
| ≥10%                                                                                       | 1.30            | 1.13 – 1.49 | <0.001 | 1.36            | 1.21 – 1.54 | <0.001 |
| <b>Number of THRs performed in calendar year<sup>2</sup><br/>(per 10 additional cases)</b> | 1.01            | 0.99 – 1.04 | 0.359  | 1.04            | 1.01 – 1.06 | 0.001  |
| <b>Proportion of THRs funded privately</b>                                                 |                 |             |        |                 |             |        |
| 100% NHS funded (ref.)                                                                     | 1               | -           | -      | 1               | -           | -      |
| Some or all funded privately                                                               | 1.24            | 1.05 – 1.47 | 0.012  | 1.04            | 0.91 – 1.19 | 0.546  |
| <b>Number of stem-cup combinations used in calendar year</b>                               |                 |             |        |                 |             |        |
| ≤3 (ref.)                                                                                  | 1               | -           | -      | 1               | -           | -      |
| 4-6                                                                                        | 4.13            | 3.44 – 4.96 | <0.001 | 3.22            | 2.82 – 3.69 | <0.001 |
| 7-10                                                                                       | 10.8            | 8.62 – 13.6 | <0.001 | 6.23            | 5.15 – 7.53 | <0.001 |
| >10                                                                                        | 24.3            | 15.8 – 37.4 | <0.001 | 12.1            | 8.37 – 17.5 | <0.001 |
| <b>Proportion of THRs performed on patients with ASA grade III-V</b>                       |                 |             |        |                 |             |        |
| <25% (ref.)                                                                                | 1               | -           | -      | 1               | -           | -      |
| ≥25%                                                                                       | 1.11            | 0.94 – 1.31 | 0.214  | 1.21            | 1.05 – 1.38 | 0.007  |

1 – odds ratios, 95% confidence intervals and p-values are from logistic regression models adjusted for all exposure variables

Table S10 Sensitivity analysis 2a: Results from multivariable logistic regression models showing the association between surgeon-level factors (consultant in-charge) and use of new versus old stems and cups

| Exposure                                                                                   | Stems           |             |        | Cups            |             |        |
|--------------------------------------------------------------------------------------------|-----------------|-------------|--------|-----------------|-------------|--------|
|                                                                                            | OR <sup>1</sup> | (95% CI)    | p      | OR <sup>1</sup> | (95% CI)    | p      |
| <b>Proportion of THRs performed on patients &lt;55 years old</b>                           |                 |             |        |                 |             |        |
| <10% (ref.)                                                                                | 1               | -           | -      | 1               | -           | -      |
| ≥10%                                                                                       | 1.52            | 1.33 – 1.74 | <0.001 | 1.46            | 1.30 – 1.64 | <0.001 |
| <b>Number of THRs performed in calendar year<sup>2</sup><br/>(per 10 additional cases)</b> | 1.02            | 1.00 – 1.04 | 0.039  | 1.05            | 1.04 – 1.07 | <0.001 |
| <b>Proportion of THRs funded privately</b>                                                 |                 |             |        |                 |             |        |
| 100% NHS funded (ref.)                                                                     | 1               | -           | -      | 1               | -           | -      |
| Some or all funded privately                                                               | 1.27            | 1.08 – 1.50 | 0.004  | 1.15            | 1.01 – 1.31 | 0.042  |
| <b>Number of stem-cup combinations used in calendar year</b>                               |                 |             |        |                 |             |        |
| ≤3 (ref.)                                                                                  | 1               | -           | -      | 1               | -           | -      |
| 4-6                                                                                        | 4.72            | 3.98 – 5.60 | <0.001 | 3.47            | 3.04 – 3.97 | <0.001 |
| 7-10                                                                                       | 11.2            | 8.87 – 14.1 | <0.001 | 6.16            | 5.06 – 7.49 | <0.001 |
| >10                                                                                        | 26.7            | 17.9 – 39.9 | <0.001 | 11.3            | 7.91 – 16.1 | <0.001 |
| <b>Proportion of THRs performed on patients with ASA grade III-V</b>                       |                 |             |        |                 |             |        |
| <25% (ref.)                                                                                | 1               | -           | -      | 1               | -           | -      |
| ≥25%                                                                                       | 1.15            | 0.98 – 1.35 | 0.077  | 1.13            | 0.99 – 1.29 | 0.064  |

1 – odds ratios, 95% confidence intervals and p-values are from logistic regression models adjusted for all exposure variables

Table S11 Sensitivity analysis 2b: Results from multivariable mixed-effects regression models (patients nested within 'consultant in-charge') of age, gender, categorised BMI, ASA grade, and source of funding on stem and cup age

|                               | Stems           |             |        | Cups            |             |        |
|-------------------------------|-----------------|-------------|--------|-----------------|-------------|--------|
|                               | OR <sup>1</sup> | (95% CI)    | p      | OR <sup>1</sup> | (95% CI)    | p      |
| <b>Age (years)</b>            |                 |             |        |                 |             |        |
| <55 years old                 | 1.89            | 1.79 – 1.99 | <0.001 | 1.32            | 1.26 – 1.37 | <0.001 |
| 55 to 80 (ref.)               | 1               | -           | -      | 1               | -           | -      |
| ≥ 80 years old                | 0.59            | 0.55 – 0.63 | <0.001 | 0.92            | 0.88 – 0.96 | <0.001 |
| <b>Gender</b>                 |                 |             |        |                 |             |        |
| Male (ref.)                   | 1               | -           | -      | 1               | -           | -      |
| Female                        | 0.87            | 0.84 – 0.91 | <0.001 | 1.05            | 1.02 – 1.09 | <0.001 |
| <b>BMI</b>                    |                 |             |        |                 |             |        |
| Underweight and normal (ref.) | 1               | -           | -      | 1               | -           | -      |
| Overweight                    | 1.01            | 0.96 – 1.07 | 0.663  | 0.95            | 0.91 – 0.98 | 0.005  |
| Class I Obese                 | 1.05            | 0.99 – 1.11 | 0.123  | 0.93            | 0.89 – 0.97 | <0.001 |
| Class II Obese                | 1.09            | 1.01 – 1.17 | 0.031  | 0.94            | 0.89 – 1.00 | 0.039  |
| Class III Obese               | 0.98            | 0.87 – 1.10 | 0.737  | 0.95            | 0.87 – 1.04 | 0.264  |
| <b>ASA grade</b>              |                 |             |        |                 |             |        |
| I (ref.)                      | 1               | -           | -      | 1               | -           | -      |
| II                            | 0.80            | 0.76 – 0.84 | <0.001 | 0.97            | 0.93 – 1.01 | 0.168  |
| III                           | 0.64            | 0.60 – 0.69 | <0.001 | 0.97            | 0.92 – 1.03 | 0.338  |
| IV + V                        | 0.62            | 0.44 – 0.87 | 0.006  | 1.00            | 0.81 – 1.23 | 0.981  |
| <b>Source of funding</b>      |                 |             |        |                 |             |        |
| NHS                           | 1               | -           | -      | 1               | -           | -      |
| Private                       | 1.14            | 1.07 – 1.21 | <0.001 | 1.13            | 1.08 – 1.18 | <0.001 |

1 – odds ratios, 95% confidence intervals and p-values are from mixed-effects logistic regression models adjusted for all exposure variables



1  
2  
3  
4  
5  
6  
7  
8  
9  
10  
11  
12  
13  
14  
15  
16  
17  
18  
19  
20  
21  
22  
23  
24  
25  
26  
27  
28  
29  
30  
31  
32  
33  
34  
35  
36  
37  
38  
39  
40  
41  
42  
43  
44  
45  
46  
47

Table S11 Sensitivity analysis 3: A comparison of results from multivariable mixed-effects regression models (patients nested within 'lead surgeon', excluding BMI) using a) patients with complete data for all exposures and BMI and, b) patients with complete data for all exposures excluding BMI

|                          | Stems                                                |             |        |                                            |             |        | Cups                                                 |             |        |                                            |             |        |
|--------------------------|------------------------------------------------------|-------------|--------|--------------------------------------------|-------------|--------|------------------------------------------------------|-------------|--------|--------------------------------------------|-------------|--------|
|                          | a) Complete cases only <sup>1</sup><br>(n = 431,955) |             |        | b) All cases <sup>2</sup><br>(n = 616,879) |             |        | a) Complete cases only <sup>1</sup><br>(n = 431,955) |             |        | b) All cases <sup>2</sup><br>(n = 616,879) |             |        |
|                          | OR <sup>3</sup>                                      | (95% CI)    | p      | OR <sup>3</sup>                            | (95% CI)    | p      | OR <sup>3</sup>                                      | (95% CI)    | p      | OR <sup>3</sup>                            | (95% CI)    | p      |
| <b>Age (years)</b>       |                                                      |             |        |                                            |             |        |                                                      |             |        |                                            |             |        |
| <55 years old            | 1.83                                                 | 1.74 – 1.93 | <0.001 | 1.81                                       | 1.73 – 1.90 | <0.001 | 1.31                                                 | 1.25 – 1.37 | <0.001 | 1.37                                       | 1.32 – 1.42 | <0.001 |
| 55 to 80 (ref.)          | 1                                                    | -           | -      | 1                                          | -           | -      | 1                                                    | -           | -      | 1                                          | -           | -      |
| ≥ 80 years old           | 0.59                                                 | 0.55 – 0.63 | <0.001 | 0.61                                       | 0.61 – 0.57 | <0.001 | 0.92                                                 | 0.88 – 0.96 | <0.001 | 0.95                                       | 0.92 – 0.99 | 0.008  |
| <b>Gender</b>            |                                                      |             |        |                                            |             |        |                                                      |             |        |                                            |             |        |
| Male (ref.)              | 1                                                    | -           | -      | 1                                          | -           | -      | 1                                                    | -           | -      | 1                                          | -           | -      |
| Female                   | 0.86                                                 | 0.83 – 0.90 | <0.001 | 0.84                                       | 0.82 – 0.87 | <0.001 | 1.07                                                 | 1.04 – 1.10 | <0.001 | 1.04                                       | 1.02 – 1.07 | 0.001  |
| <b>ASA grade</b>         |                                                      |             |        |                                            |             |        |                                                      |             |        |                                            |             |        |
| I (ref.)                 | 1                                                    | -           | -      | 1                                          | -           | -      | 1                                                    | -           | -      | 1                                          | -           | -      |
| II                       | 0.82                                                 | 0.78 – 0.87 | <0.001 | 0.82                                       | 0.78 – 0.86 | <0.001 | 0.98                                                 | 0.94 – 1.02 | 0.264  | 0.97                                       | 0.94 – 1.01 | 0.100  |
| III                      | 0.67                                                 | 0.62 – 0.72 | <0.001 | 0.66                                       | 0.62 – 0.70 | <0.001 | 0.99                                                 | 0.94 – 1.04 | 0.641  | 1.01                                       | 0.97 – 1.06 | 0.591  |
| IV + V                   | 0.65                                                 | 0.46 – 0.91 | 0.011  | 0.67                                       | 0.52 – 0.86 | 0.002  | 1.01                                                 | 0.82 – 1.25 | 0.927  | 1.12                                       | 0.95 – 1.32 | 0.175  |
| <b>Source of funding</b> |                                                      |             |        |                                            |             |        |                                                      |             |        |                                            |             |        |
| NHS (ref.)               | 1                                                    | -           | -      | 1                                          | -           | -      | 1                                                    | -           | -      | 1                                          | -           | -      |
| Private                  | 1.01                                                 | 0.95 – 1.08 | 0.688  | 1.02                                       | 0.97 – 1.08 | 0.403  | 1.09                                                 | 1.04 – 1.14 | <0.001 | 1.07                                       | 1.03 – 1.11 | 0.001  |

1 – The study sample for 'Complete cases only' was defined as those cases with complete data for all exposure variables (age, gender, ASA grade and source of funding) and BMI

2 - The study sample for 'All cases' was defined as those cases with complete data for all exposure variables (age, gender, ASA grade and source of funding)

3 – odds ratios, 95% confidence intervals and p-values are from mixed-effects logistic regression models adjusted for all exposure variables

1  
2  
3  
4  
5  
6  
7  
8  
9  
10  
11  
12  
13  
14  
15  
16  
17  
18  
19  
20  
21  
22  
23  
24  
25  
26  
27  
28  
29  
30  
31  
32  
33  
34  
35  
36  
37  
38  
39  
40  
41  
42  
43  
44  
45  
46  
47

*Figure S1 The cumulative introduction of new brands of cup and stem components for THRs, between January 1<sup>st</sup> 2008 and 26<sup>th</sup> February 2017*

For peer review only

1  
2  
3  
4  
5  
6  
7  
8  
9  
10  
11  
12  
13  
14  
15  
16  
17  
18  
19  
20  
21  
22  
23  
24  
25  
26  
27  
28  
29  
30  
31  
32  
33  
34  
35  
36  
37  
38  
39  
40  
41  
42  
43  
44  
45  
46  
47

*Figure S2 STROBE Flow diagram*

For peer review only



Figure S1 The cumulative introduction of new brands of cup and stem components for THRs, between January 1st 2008 and 26th February 2017

319x232mm (72 x 72 DPI)

1  
2  
3  
4  
5  
6  
7  
8  
9  
10  
11  
12  
13  
14  
15  
16  
17  
18  
19  
20  
21  
22  
23  
24  
25  
26  
27  
28  
29  
30  
31  
32  
33  
34  
35  
36  
37  
38  
39  
40  
41  
42  
43  
44  
45  
46  
47  
48  
49  
50  
51  
52  
53  
54  
55  
56  
57  
58  
59  
60

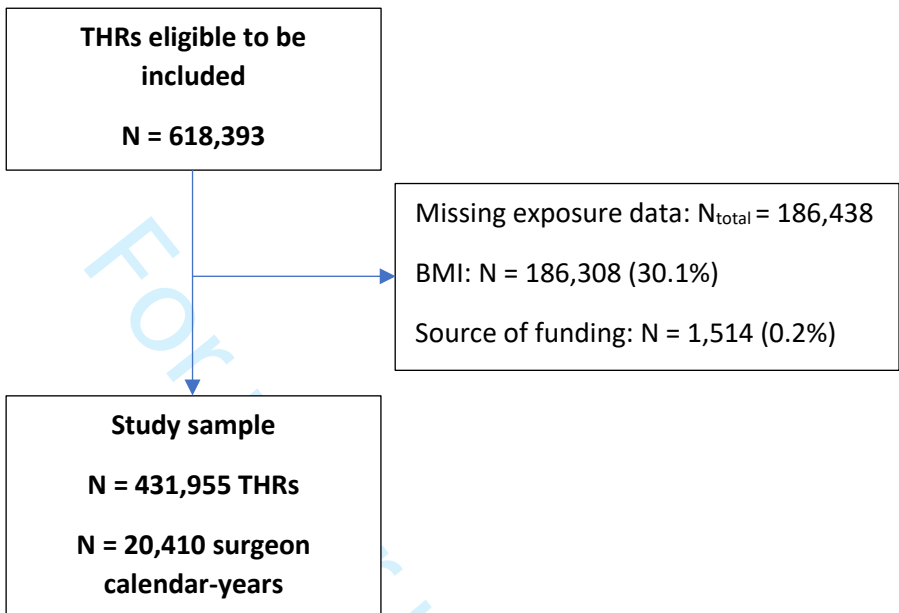

# Reporting checklist for cohort study.

Based on the STROBE cohort guidelines.

## Instructions to authors

Complete this checklist by entering the page numbers from your manuscript where readers will find each of the items listed below.

Your article may not currently address all the items on the checklist. Please modify your text to include the missing information. If you are certain that an item does not apply, please write "n/a" and provide a short explanation.

Upload your completed checklist as an extra file when you submit to a journal.

In your methods section, say that you used the STROBE cohort reporting guidelines, and cite them as:

von Elm E, Altman DG, Egger M, Pocock SJ, Gotsche PC, Vandembroucke JP. The Strengthening the Reporting of Observational Studies in Epidemiology (STROBE) Statement: guidelines for reporting observational studies.

|          |     | Reporting Item                                                                                  | Page Number |
|----------|-----|-------------------------------------------------------------------------------------------------|-------------|
| Title    | #1a | Indicate the study's design with a commonly used term in the title or the abstract              | 1           |
| Abstract | #1b | Provide in the abstract an informative and balanced summary of what was done and what was found | 4           |

|    |                      |     |                                                                   |          |
|----|----------------------|-----|-------------------------------------------------------------------|----------|
| 1  | Background /         | #2  | Explain the scientific background and rationale for the           | 6        |
| 2  |                      |     |                                                                   |          |
| 3  | rationale            |     | investigation being reported                                      |          |
| 4  |                      |     |                                                                   |          |
| 5  |                      |     |                                                                   |          |
| 6  | Objectives           | #3  | State specific objectives, including any prespecified             | 6        |
| 7  |                      |     | hypotheses                                                        |          |
| 8  |                      |     |                                                                   |          |
| 9  |                      |     |                                                                   |          |
| 10 |                      |     |                                                                   |          |
| 11 | Study design         | #4  | Present key elements of study design early in the paper           | 7        |
| 12 |                      |     |                                                                   |          |
| 13 |                      |     |                                                                   |          |
| 14 | Setting              | #5  | Describe the setting, locations, and relevant dates, including    | 7        |
| 15 |                      |     | periods of recruitment, exposure, follow-up, and data collection  |          |
| 16 |                      |     |                                                                   |          |
| 17 |                      |     |                                                                   |          |
| 18 | Eligibility criteria | #6a | Give the eligibility criteria, and the sources and methods of     | 7        |
| 19 |                      |     | selection of participants. Describe methods of follow-up.         |          |
| 20 |                      |     |                                                                   |          |
| 21 |                      | #6b | For matched studies, give matching criteria and number of         | See note |
| 22 |                      |     | exposed and unexposed                                             | 1        |
| 23 |                      |     |                                                                   |          |
| 24 |                      |     |                                                                   |          |
| 25 | Variables            | #7  | Clearly define all outcomes, exposures, predictors, potential     | 7-8      |
| 26 |                      |     | confounders, and effect modifiers. Give diagnostic criteria, if   |          |
| 27 |                      |     | applicable                                                        |          |
| 28 |                      |     |                                                                   |          |
| 29 |                      |     |                                                                   |          |
| 30 |                      |     |                                                                   |          |
| 31 | Data sources /       | #8  | For each variable of interest give sources of data and details of | 7-8      |
| 32 | measurement          |     | methods of assessment (measurement). Describe                     |          |
| 33 |                      |     | comparability of assessment methods if there is more than one     |          |
| 34 |                      |     | group. Give information separately for for exposed and            |          |
| 35 |                      |     | unexposed groups if applicable.                                   |          |
| 36 |                      |     |                                                                   |          |
| 37 |                      |     |                                                                   |          |
| 38 | Bias                 | #9  | Describe any efforts to address potential sources of bias         | 8-9      |
| 39 |                      |     |                                                                   |          |
| 40 |                      |     |                                                                   |          |
| 41 |                      |     |                                                                   |          |
| 42 |                      |     |                                                                   |          |
| 43 |                      |     |                                                                   |          |
| 44 |                      |     |                                                                   |          |
| 45 |                      |     |                                                                   |          |
| 46 |                      |     |                                                                   |          |
| 47 |                      |     |                                                                   |          |
| 48 |                      |     |                                                                   |          |
| 49 |                      |     |                                                                   |          |
| 50 |                      |     |                                                                   |          |
| 51 | Study size           | #10 | Explain how the study size was arrived at                         | See note |
| 52 |                      |     |                                                                   |          |
| 53 |                      |     |                                                                   |          |
| 54 |                      |     |                                                                   |          |
| 55 |                      |     |                                                                   |          |
| 56 |                      |     |                                                                   | 2        |
| 57 |                      |     |                                                                   |          |
| 58 |                      |     |                                                                   |          |
| 59 |                      |     |                                                                   |          |
| 60 |                      |     |                                                                   |          |

|    |                        |                     |                                                                                                                                                                                                                                                                                |                                                                                   |          |
|----|------------------------|---------------------|--------------------------------------------------------------------------------------------------------------------------------------------------------------------------------------------------------------------------------------------------------------------------------|-----------------------------------------------------------------------------------|----------|
| 1  | Quantitative variables | #11                 | Explain how quantitative variables were handled in the analyses. If applicable, describe which groupings were chosen, and why                                                                                                                                                  | 8-9                                                                               |          |
| 2  |                        | Statistical methods | #12a                                                                                                                                                                                                                                                                           | Describe all statistical methods, including those used to control for confounding | 8-9      |
| 3  |                        |                     | #12b                                                                                                                                                                                                                                                                           | Describe any methods used to examine subgroups and interactions                   | 8-9      |
| 4  |                        |                     | #12c                                                                                                                                                                                                                                                                           | Explain how missing data were addressed                                           | 8        |
| 5  |                        |                     | #12d                                                                                                                                                                                                                                                                           | If applicable, explain how loss to follow-up was addressed                        | See note |
| 6  |                        |                     |                                                                                                                                                                                                                                                                                |                                                                                   | 3        |
| 7  |                        |                     | #12e                                                                                                                                                                                                                                                                           | Describe any sensitivity analyses                                                 | 8-9      |
| 8  | Participants           | #13a                | Report numbers of individuals at each stage of study—eg numbers potentially eligible, examined for eligibility, confirmed eligible, included in the study, completing follow-up, and analysed. Give information separately for for exposed and unexposed groups if applicable. | 9-10                                                                              |          |
| 9  |                        | #13b                | Give reasons for non-participation at each stage                                                                                                                                                                                                                               | 9-10                                                                              |          |
| 10 |                        | #13c                | Consider use of a flow diagram                                                                                                                                                                                                                                                 | Figure S2                                                                         |          |
| 11 | Descriptive data       | #14a                | Give characteristics of study participants (eg demographic, clinical, social) and information on exposures and potential confounders. Give information separately for exposed and                                                                                              | 9-10                                                                              |          |
| 12 |                        |                     |                                                                                                                                                                                                                                                                                |                                                                                   |          |





|    |                  |     |                                                                      |       |
|----|------------------|-----|----------------------------------------------------------------------|-------|
| 1  | Interpretation   | #20 | Give a cautious overall interpretation considering objectives,       | 13-15 |
| 2  |                  |     | limitations, multiplicity of analyses, results from similar studies, |       |
| 3  |                  |     | and other relevant evidence.                                         |       |
| 4  |                  |     |                                                                      |       |
| 5  |                  |     |                                                                      |       |
| 6  |                  |     |                                                                      |       |
| 7  |                  |     |                                                                      |       |
| 8  |                  |     |                                                                      |       |
| 9  | Generalisability | #21 | Discuss the generalisability (external validity) of the study        | 15    |
| 10 |                  |     | results                                                              |       |
| 11 |                  |     |                                                                      |       |
| 12 |                  |     |                                                                      |       |
| 13 |                  |     |                                                                      |       |
| 14 | Funding          | #22 | Give the source of funding and the role of the funders for the       | 3     |
| 15 |                  |     | present study and, if applicable, for the original study on which    |       |
| 16 |                  |     | the present article is based                                         |       |
| 17 |                  |     |                                                                      |       |
| 18 |                  |     |                                                                      |       |
| 19 |                  |     |                                                                      |       |
| 20 |                  |     |                                                                      |       |
| 21 |                  |     |                                                                      |       |
| 22 |                  |     |                                                                      |       |

## Author notes

1. n/a - not relevant
2. n/a - not relevant
3. n/a - not relevant
4. 10 and Fig S2
5. n/a - not relevant
6. Tables 1 & 2
7. Tables S6 & S7
8. n/a - not needed
9. n/a - not needed

The STROBE checklist is distributed under the terms of the Creative Commons Attribution License CC-BY. This checklist was completed on 31. January 2019 using <https://www.goodreports.org/>, a tool made by the [EQUATOR Network](#) in collaboration with [Penelope.ai](#)
