# Supplementary material for: Understanding the uptake of new hip replacement implants in the UK: a cohort study using data from the National Joint Registry for England and Wales
Source: PubMed Central journal article supplement (PMC6886938; doi:10.1136/bmjopen-2019-029572), 2019-11-25
Supplement: bmjopen-2019-029572supp001.pdf [file bmjopen-2019-029572supp001.pdf]

## Supplementary material

Table S1 Uptake of new cups first used between January 1<sup>st</sup> 2008 and 26<sup>th</sup> February 2017

| Cup/shell brand                    | UC <sup>1</sup> | Patients      | Percent      | Surgeons   | Month first used |
|------------------------------------|-----------------|---------------|--------------|------------|------------------|
| <b>Exeter X3 Rimfit</b>            |                 | <b>13,821</b> | <b>38.5%</b> | <b>781</b> | <b>Jun 2010</b>  |
| <b>Trinity</b>                     | ✓               | <b>6,133</b>  | <b>17.1%</b> | <b>197</b> | <b>Nov 2009</b>  |
| <b>Pinnacle Gription</b>           | ✓               | <b>2,817</b>  | <b>7.9%</b>  | <b>375</b> | <b>Dec 2009</b>  |
| <b>Delta TT</b>                    | ✓               | <b>2,368</b>  | <b>6.6%</b>  | <b>145</b> | <b>Jun 2009</b>  |
| <b>DeltaMotion</b>                 | ✓               | <b>1,823</b>  | <b>5.1%</b>  | <b>152</b> | <b>Feb 2009</b>  |
| Versafit CC Trio                   | ✓               | 1,442         | 4.0%         | 47         | Mar 2011         |
| RM Pressfit Vitamys                | ✓               | 731           | 2.0%         | 33         | Aug 2011         |
| G7 Cementless Acetabular Component | ✓               | 621           | 1.7%         | 36         | Aug 2014         |
| AEON Cemented Acetabular Cup       |                 | 568           | 1.6%         | 43         | Sep 2011         |
| Exceed ABT Cemented                |                 | 556           | 1.5%         | 57         | Jun 2011         |
| Plasmafit Cementless Cup           | ✓               | 546           | 1.5%         | 50         | Nov 2012         |
| Duracel                            |                 | 465           | 1.3%         | 45         | Mar 2013         |
| Allofit IT                         | ✓               | 367           | 1.0%         | 19         | Jan 2010         |
| ADES Cemented                      |                 | 342           | 1.0%         | 72         | Feb 2014         |
| XLFit Acetabular Cup               | ✓               | 293           | 0.8%         | 56         | Apr 2015         |
| Regenerex Ringloc+                 | ✓               | 220           | 0.6%         | 55         | Feb 2009         |
| April - Polyethylene               | ✓               | 214           | 0.6%         | 33         | Jan 2012         |
| ADES                               | ✓               | 205           | 0.6%         | 39         | May 2014         |
| Delta PF                           | ✓               | 198           | 0.6%         | 9          | Mar 2011         |
| MIHR Cup                           | ✓               | 197           | 0.5%         | 12         | Mar 2008         |
| RM Pressfit                        | ✓               | 184           | 0.5%         | 24         | May 2008         |
| Tribofit                           | ✓               | 174           | 0.5%         | 9          | Jul 2010         |
| seleXys TH+                        | ✓               | 174           | 0.5%         | 13         | Nov 2008         |
| OptiCup CEP                        |                 | 147           | 0.4%         | 18         | Nov 2014         |
| Delta One TT                       | ✓               | 129           | 0.4%         | 61         | Jun 2010         |
| Gyros                              | ✓               | 129           | 0.4%         | 28         | Jan 2010         |
| Restoration ADM Cup                | ✓               | 127           | 0.4%         | 31         | May 2011         |
| EcoFit Cementless Cup              | ✓               | 102           | 0.3%         | 5          | Feb 2013         |
| Novation                           | ✓               | 93            | 0.3%         | 10         | Nov 2009         |
| Allofit-S IT                       | ✓               | 91            | 0.3%         | 21         | Aug 2010         |
| M2A Magnum                         | ✓               | 79            | 0.2%         | 30         | Feb 2008         |
| Freedom                            |                 | 75            | 0.2%         | 17         | May 2008         |
| Captiv DM                          | ✓               | 68            | 0.2%         | 8          | Aug 2011         |
| Trident Constrained Cup            |                 | 65            | 0.2%         | 30         | Jan 2008         |

|                        |   |        |      |    |          |
|------------------------|---|--------|------|----|----------|
| seleXys DS Cementless  | ✓ | 56     | 0.2% | 16 | Mar 2014 |
| MMC Resurfacing        | ✓ | 36     | 0.1% | 10 | Aug 2009 |
| ASR 300 Cup            | ✓ | 36     | 0.1% | 1  | Jan 2009 |
| MPACT                  | ✓ | 25     | 0.1% | 8  | Dec 2011 |
| Restoration Gap2       |   | 23     | 0.1% | 14 | Mar 2008 |
| Fixa Ti-Por            | ✓ | 20     | 0.1% | 4  | Apr 2014 |
| seleXys DS Cemented    |   | 20     | 0.1% | 12 | Feb 2014 |
| Fixa Duplex            | ✓ | 17     | 0.0% | 1  | Mar 2016 |
| Cormet Prime           | ✓ | 12     | 0.0% | 5  | Jan 2010 |
| Delta Revision TT      | ✓ | 9      | 0.0% | 6  | Nov 2010 |
| Equateur               | ✓ | 9      | 0.0% | 5  | Jul 2008 |
| U-Motion II            | ✓ | 8      | 0.0% | 4  | Apr 2016 |
| A Class                |   | 7      | 0.0% | 3  | Feb 2009 |
| Zimmer Cemented Cup    |   | 6      | 0.0% | 4  | May 2013 |
| Regenerex Revision     | ✓ | 4      | 0.0% | 3  | Jan 2009 |
| Capitole C             |   | 3      | 0.0% | 3  | Jan 2013 |
| Sirius Cementless Cup  | ✓ | 3      | 0.0% | 2  | Aug 2011 |
| Horizon                | ✓ | 3      | 0.0% | 2  | Jul 2008 |
| 2M Dual Mobility       | ✓ | 3      | 0.0% | 2  | Nov 2012 |
| Par-5                  | ✓ | 3      | 0.0% | 3  | Jan 2008 |
| Solution Cemented Cup  |   | 2      | 0.0% | 1  | Dec 2015 |
| J-Loc                  | ✓ | 2      | 0.0% | 2  | Mar 2013 |
| XPE Cup                |   | 2      | 0.0% | 1  | Jun 2016 |
| Evidence               |   | 2      | 0.0% | 1  | Oct 2014 |
| FIXA Duplex Cemented   |   | 1      | 0.0% | 1  | Jan 2017 |
| Endurance Cemented Cup |   | 1      | 0.0% | 1  | Oct 2016 |
| Mitre Cup              |   | 1      | 0.0% | 1  | Nov 2013 |
| Capitole T             | ✓ | 1      | 0.0% | 1  | Nov 2014 |
| Polymax                | ✓ | 1      | 0.0% | 1  | Oct 2016 |
| Ringloc                | ✓ | 1      | 0.0% | 1  | Jan 2011 |
| Charnley KS            |   | 1      | 0.0% | 1  | Jul 2011 |
| Arden                  |   | 1      | 0.0% | 1  | Feb 2008 |
| Versacem               |   | 1      | 0.0% | 1  | Oct 2009 |
| Versafit DM            | ✓ | 1      | 0.0% | 1  | May 2008 |
|                        |   |        |      |    |          |
| Total                  |   | 35,885 |      |    |          |

1 – Uncemented fixation, Rows in **bold** = five most commonly used new cups

Table S2 Uptake of new stems first used between January 1<sup>st</sup> 2008 and 26<sup>th</sup> February 2017

| Stem brand                            | UC <sup>1</sup> | Patients | Percent | Surgeons | Month first used |
|---------------------------------------|-----------------|----------|---------|----------|------------------|
| Trilock BPS                           | ✓               | 2,232    | 12.3%   | 121      | Dec 2009         |
| Accolade II                           | ✓               | 1,997    | 11.0%   | 165      | Jan 2012         |
| Polarstem Cementless                  | ✓               | 1,969    | 10.8%   | 93       | Dec 2008         |
| Taperloc Complete Cementless Stem     | ✓               | 1,658    | 9.1%    | 104      | Jan 2011         |
| miniHip                               | ✓               | 1,193    | 6.6%    | 79       | Mar 2009         |
| Metafix Stem                          | ✓               | 1,171    | 6.4%    | 93       | Feb 2008         |
| AMiStem-H                             | ✓               | 1,003    | 5.5%    | 32       | Aug 2009         |
| Exeter No.1 125mm stem Line Extension |                 | 836      | 4.6%    | 211      | Aug 2014         |
| TriFit TS hip stem                    | ✓               | 684      | 3.8%    | 44       | Sep 2012         |
| Aeon Cemented Stem                    |                 | 673      | 3.7%    | 50       | Sep 2011         |
| SPS Evolution                         | ✓               | 654      | 3.6%    | 48       | Jan 2012         |
| C-Stem AMT Line Extension             |                 | 428      | 2.4%    | 127      | Jul 2013         |
| H-Max S Monoblock Stem                | ✓               | 401      | 2.2%    | 34       | May 2010         |
| H-Max M Modular Stem                  | ✓               | 316      | 1.7%    | 20       | Mar 2010         |
| Finsbury Type C                       | ✓               | 302      | 1.7%    | 39       | Aug 2008         |
| EcoFit Cementless Stem                | ✓               | 240      | 1.3%    | 11       | Sep 2010         |
| Silent                                | ✓               | 199      | 1.1%    | 17       | Feb 2008         |
| Metha Monoblock Stem                  | ✓               | 195      | 1.1%    | 25       | Aug 2011         |
| Corail Cemented                       |                 | 170      | 0.9%    | 32       | Apr 2009         |
| OptiStem                              |                 | 165      | 0.9%    | 22       | Nov 2014         |
| Trilliance                            |                 | 156      | 0.9%    | 10       | Jul 2011         |
| Sirius stem                           |                 | 138      | 0.8%    | 10       | Apr 2014         |
| Profemur L Classic                    | ✓               | 132      | 0.7%    | 17       | Mar 2014         |
| Profemur TL                           | ✓               | 120      | 0.7%    | 23       | Jan 2008         |
| AMiStem-C                             |                 | 110      | 0.6%    | 3        | Jul 2012         |
| Master SL                             | ✓               | 102      | 0.6%    | 8        | Jul 2013         |
| Corail Revision Stem                  | ✓               | 92       | 0.5%    | 69       | Jul 2010         |
| Novation Element Stem                 | ✓               | 90       | 0.5%    | 9        | Nov 2009         |
| CBC Evolution                         | ✓               | 83       | 0.5%    | 8        | Jan 2013         |
| Nanos                                 | ✓               | 78       | 0.4%    | 5        | Dec 2011         |
| Amoda                                 | ✓               | 67       | 0.4%    | 1        | Apr 2010         |
| Harmony Modular                       | ✓               | 65       | 0.4%    | 6        | Mar 2010         |
| ABG II Cementless Stem                | ✓               | 52       | 0.3%    | 9        | Apr 2009         |
| SL                                    | ✓               | 51       | 0.3%    | 5        | Sep 2009         |
| XActa                                 |                 | 47       | 0.3%    | 5        | Jan 2014         |
| Avenir Muller Cementless              | ✓               | 33       | 0.2%    | 6        | Jun 2016         |
| Harmony Cemented                      |                 | 25       | 0.1%    | 8        | Feb 2014         |

|                              |   |               |      |    |          |
|------------------------------|---|---------------|------|----|----------|
| miniMax                      | ✓ | 24            | 0.1% | 2  | Apr 2011 |
| SMS                          | ✓ | 22            | 0.1% | 2  | Jul 2015 |
| FTS                          | ✓ | 20            | 0.1% | 5  | Feb 2009 |
| Profemur TL Classic          | ✓ | 19            | 0.1% | 5  | Jan 2016 |
| SMF                          | ✓ | 17            | 0.1% | 1  | Oct 2011 |
| Profemur Preserve            | ✓ | 12            | 0.1% | 5  | Feb 2012 |
| AMiStem HP                   | ✓ | 12            | 0.1% | 1  | Dec 2015 |
| METS Cemented                |   | 12            | 0.1% | 10 | Dec 2012 |
| GMRS                         |   | 11            | 0.1% | 9  | Aug 2012 |
| Harmony Cementless           | ✓ | 10            | 0.1% | 4  | Apr 2011 |
| UCP Stem                     |   | 10            | 0.1% | 5  | Apr 2016 |
| Echelon Cemented Stem        |   | 8             | 0.0% | 6  | Mar 2008 |
| Exception Cementless         | ✓ | 6             | 0.0% | 3  | Feb 2010 |
| METS Cementless              | ✓ | 5             | 0.0% | 5  | Feb 2013 |
| Novation Stem                | ✓ | 5             | 0.0% | 2  | Mar 2014 |
| G2 Cementless Stem           | ✓ | 5             | 0.0% | 5  | Dec 2013 |
| Securus                      | ✓ | 4             | 0.0% | 4  | Dec 2009 |
| Profemur Gladiator           | ✓ | 4             | 0.0% | 3  | Mar 2010 |
| Arcad Cementless             | ✓ | 4             | 0.0% | 4  | Sep 2010 |
| Euros Cementless             | ✓ | 3             | 0.0% | 2  | Aug 2011 |
| Atlantis                     | ✓ | 3             | 0.0% | 3  | Dec 2011 |
| Quadra-C                     |   | 3             | 0.0% | 2  | Oct 2009 |
| Restoration Cemented Stem    |   | 1             | 0.0% | 1  | Feb 2014 |
| Wagner Revision Stem         | ✓ | 1             | 0.0% | 1  | Apr 2016 |
| Initiale Cemented Stem       |   | 1             | 0.0% | 1  | Jul 2008 |
| Integrale                    | ✓ | 1             | 0.0% | 1  | Jun 2009 |
| optimys                      | ✓ | 1             | 0.0% | 1  | Feb 2017 |
| Prodigy                      | ✓ | 1             | 0.0% | 1  | Jul 2010 |
| CDH Stem                     | ✓ | 1             | 0.0% | 1  | Nov 2012 |
| Friendly                     |   | 1             | 0.0% | 1  | Jul 2012 |
| Regulus Cemented Stem        |   | 1             | 0.0% | 1  | Oct 2016 |
| Arcad Cemented               |   | 1             | 0.0% | 1  | Feb 2009 |
| Endurance Cemented Stem      |   | 1             | 0.0% | 1  | Sep 2013 |
| Furlong HAC Hemiarthroplasty | ✓ | 1             | 0.0% | 1  | Oct 2010 |
| C2 Stem                      | ✓ | 1             | 0.0% | 1  | Feb 2015 |
|                              |   |               |      |    |          |
| <b>Total</b>                 |   | <b>18,159</b> |      |    |          |

1 – Uncemented fixation, Rows in **bold** = five most commonly used new stems

Table S3 Number of different post-2008 shells/cups used by surgeons

| Number of new cups used | Number of surgeons | Percent | Cumulative percent |
|-------------------------|--------------------|---------|--------------------|
| 1                       | 1,113              | 65.5%   | 65.5%              |
| 2                       | 351                | 20.7%   | 86.2%              |
| 3                       | 138                | 8.1%    | 94.3%              |
| 4                       | 61                 | 3.6%    | 97.9%              |
| 5                       | 18                 | 1.1%    | 98.9%              |
| 6                       | 8                  | 0.5%    | 99.4%              |
| 7                       | 9                  | 0.5%    | 99.9%              |
| 10                      | 1                  | 0.1%    | 100.0%             |
| <b>Total</b>            | 1,699              |         |                    |

Table S4 Number of different post-2008 stems used by surgeons

| <b>Number of new stems used</b> | <b>Number of surgeons</b> | <b>Percent</b> | <b>Cumulative percent</b> |
|---------------------------------|---------------------------|----------------|---------------------------|
| 1                               | 771                       | 69.4%          | 69.4%                     |
| 2                               | 210                       | 18.9%          | 88.3%                     |
| 3                               | 77                        | 6.9%           | 95.2%                     |
| 4                               | 33                        | 3.0%           | 98.2%                     |
| 5                               | 9                         | 0.8%           | 99.0%                     |
| 6                               | 8                         | 0.7%           | 99.7%                     |
| 7                               | 1                         | 0.1%           | 99.8%                     |
| 8                               | 2                         | 0.2%           | 100.0%                    |
| <b>Total</b>                    | <b>1,111</b>              |                |                           |

Table S5 The number of unique new stem-cup combinations used simultaneously by surgeons

| Stem-cup combinations | Number of surgeons | Percent     | Cumulative percent |
|-----------------------|--------------------|-------------|--------------------|
| 1                     | 311                | 71.8%       | 71.8%              |
| 2                     | 78                 | 18.0%       | 89.8%              |
| 3                     | 22                 | 5.1%        | 94.9%              |
| 4                     | 10                 | 2.3%        | 97.2%              |
| 5                     | 5                  | 1.2%        | 98.4%              |
| 6                     | 2                  | 0.5%        | 98.9%              |
| 7                     | 1                  | 0.2%        | 99.1%              |
| 8                     | 2                  | 0.5%        | 99.5%              |
| 9                     | 2                  | 0.5%        | 100.0%             |
| <b>Total</b>          | <b>433</b>         | <b>100%</b> |                    |

Table S6 A comparison of people with complete data and those missing some data

|                          | <b>Incomplete<br/>(n=186,438)</b> | <b>Complete<br/>(n=431,995)</b> | <b>P*</b> |
|--------------------------|-----------------------------------|---------------------------------|-----------|
| <b>Age</b>               |                                   |                                 |           |
| <55 years old            | 19,561 (10.5%)                    | 46,573 (10.8%)                  | <0.001    |
| 55 to 80                 | 136,370 (73.1%)                   | 321,451 (74.4%)                 |           |
| ≥ 80 years old           | 30,507 (16.4%)                    | 63,931 (14.8%)                  |           |
| <b>Gender</b>            |                                   |                                 |           |
| Male                     | 71,676 (38.4%)                    | 171,375 (39.7%)                 | <0.001    |
| Female                   | 114,762 (61.6%)                   | 260,580 (60.3%)                 |           |
| <b>BMI</b>               |                                   |                                 |           |
| Underweight and normal   | 31 (23.8%)                        | 98,217 (22.7%)                  | 0.097     |
| Overweight               | 43 (33.1%)                        | 170,987 (39.6%)                 |           |
| Class I Obese            | 33 (25.4%)                        | 109,061 (25.2%)                 |           |
| Class II Obese           | 14 (10.8%)                        | 40,271 (9.3%)                   |           |
| Class III Obese          | 9 (6.9%)                          | 13,419 (3.1%)                   |           |
| <b>ASA grade</b>         |                                   |                                 |           |
| I                        | 24,893 (13.4%)                    | 62,683 (14.5%)                  | <0.001    |
| II                       | 130,223 (69.8%)                   | 302,082 (69.9%)                 |           |
| III                      | 30,180 (16.2%)                    | 65,386 (15.1%)                  |           |
| IV + V                   | 1,142 (0.6%)                      | 1,804 (0.4%)                    |           |
| <b>Source of funding</b> |                                   |                                 |           |
| NHS                      | 165,394 (89.4%)                   | 375,481 (86.9%)                 | <0.001    |
| Private                  | 19,530 (10.6%)                    | 5,6474 (13.1%)                  |           |

\*- P-values from chi square tests



Table S7 Results from unadjusted logistic regression models showing the association between surgeon-level factors and use of new versus old stems and cups

| Exposure                                                                                   | Stems           |             |        | Cups            |             |        |
|--------------------------------------------------------------------------------------------|-----------------|-------------|--------|-----------------|-------------|--------|
|                                                                                            | OR <sup>1</sup> | (95% CI)    | p      | OR <sup>1</sup> | (95% CI)    | p      |
| <b>Proportion of THRs performed on patients &lt;55 years old</b>                           |                 |             |        |                 |             |        |
| <10% (ref.)                                                                                | 1               | -           | -      | 1               | -           | -      |
| ≥10%                                                                                       | 2.79            | 2.49 – 3.13 | <0.001 | 2.38            | 2.16 – 2.62 | <0.001 |
| <b>Number of THRs performed in calendar year<sup>2</sup><br/>(per 10 additional cases)</b> |                 |             |        |                 |             |        |
| 1.19                                                                                       | 1.16 – 1.22     | <0.001      | 1.20   | 1.18 – 1.23     | <0.001      |        |
| <b>Proportion of THRs funded privately</b>                                                 |                 |             |        |                 |             |        |
| 100% NHS funded (ref.)                                                                     | 1               | -           | -      | 1               | -           | -      |
| Some or all funded privately                                                               | 2.54            | 2.21 – 2.91 | <0.001 | 2.13            | 1.90 – 2.37 | <0.001 |
| <b>Number of stem-cup combinations used in calendar year</b>                               |                 |             |        |                 |             |        |
| ≤3 (ref.)                                                                                  | 1               | -           | -      | 1               | -           | -      |
| 4-6                                                                                        | 5.86            | 5.16 – 6.66 | <0.001 | 4.74            | 4.27 – 5.26 | <0.001 |
| 7-10                                                                                       | 16.8            | 14.1 – 20.0 | <0.001 | 11.0            | 9.39 – 12.9 | <0.001 |
| >10                                                                                        | 40.5            | 27.2 – 60.1 | <0.001 | 21.2            | 17.1 – 34.2 | <0.001 |
| <b>Proportion of THRs performed on patients with ASA grade III-V</b>                       |                 |             |        |                 |             |        |
| <25% (ref.)                                                                                | 1               | -           | -      | 1               | -           | -      |
| ≥25%                                                                                       | 0.75            | 0.66 – 0.85 | <0.001 | 0.85            | 0.77 – 0.95 | 0.003  |

1 – odds ratios, 95% confidence intervals and p-values are from unadjusted logistic regression models

Table S8 Results from unadjusted mixed-effects regression models (patients nested within surgeons) of age, gender, categorised BMI, ASA grade, and source of funding on stem and cup age

|                               | Stems           |             |        | Cups            |             |        |
|-------------------------------|-----------------|-------------|--------|-----------------|-------------|--------|
|                               | OR <sup>1</sup> | (95% CI)    | p      | OR <sup>1</sup> | (95% CI)    | p      |
| <b>Age (years)</b>            |                 |             |        |                 |             |        |
| <55 years old                 | 1.95            | 1.85 – 2.05 | <0.001 | 1.31            | 1.25 – 1.36 | <0.001 |
| 55 to 80 (ref.)               | 1               | -           | -      | 1               | -           | -      |
| ≥ 80 years old                | 0.56            | 0.52 – 0.60 | <0.001 | 0.93            | 0.89 – 0.97 | <0.001 |
| <b>Gender</b>                 |                 |             |        |                 |             |        |
| Male (ref.)                   | 1               | -           | -      | 1               | -           | -      |
| Female                        | 0.83            | 0.80 – 0.86 | <0.001 | 1.05            | 1.02 – 1.08 | 0.001  |
| <b>BMI</b>                    |                 |             |        |                 |             |        |
| Underweight and normal (ref.) | 1               | -           | -      | 1               | -           | -      |
| Overweight                    | 1.06            | 1.01 – 1.12 | 0.017  | 0.94            | 0.91 – 0.98 | 0.001  |
| Class I Obese                 | 1.12            | 1.06 – 1.18 | <0.001 | 0.93            | 0.90 – 0.97 | 0.001  |
| Class II Obese                | 1.18            | 1.09 – 1.27 | <0.001 | 0.96            | 0.90 – 1.01 | 0.123  |
| Class III Obese               | 1.04            | 0.93 – 1.17 | 0.513  | 0.97            | 0.89 – 1.05 | 0.456  |
| <b>ASA grade</b>              |                 |             |        |                 |             |        |
| I (ref.)                      | 1               | -           | -      | 1               | -           | -      |
| II                            | 0.69            | 0.65 – 0.72 | <0.001 | 0.92            | 0.88 – 0.96 | <0.001 |
| III                           | 0.51            | 0.48 – 0.55 | <0.001 | 0.90            | 0.86 – 0.95 | <0.001 |
| IV + V                        | 0.47            | 0.33 – 0.65 | <0.001 | 0.91            | 0.74 – 1.13 | 0.390  |
| <b>Source of funding</b>      |                 |             |        |                 |             |        |
| NHS                           | 1               | -           | -      | 1               | -           | -      |
| Private                       | 1.01            | 0.95 – 1.07 | 0.777  | 1.08            | 1.03 – 1.13 | 0.001  |

1 – odds ratios, 95% confidence intervals and p-values are from unadjusted mixed-effects logistic regression models

Table S9 Sensitivity analysis 1: Results from multivariable logistic regression models showing the association between surgeon-level factors and use of new versus old stems and cups, excluding surgeon calendar-years with <10 THRs

| Exposure                                                                                   | Stems           |             |        | Cups            |             |        |
|--------------------------------------------------------------------------------------------|-----------------|-------------|--------|-----------------|-------------|--------|
|                                                                                            | OR <sup>1</sup> | (95% CI)    | p      | OR <sup>1</sup> | (95% CI)    | p      |
| <b>Proportion of THRs performed on patients &lt;55 years old</b>                           |                 |             |        |                 |             |        |
| <10% (ref.)                                                                                | 1               | -           | -      | 1               | -           | -      |
| ≥10%                                                                                       | 1.30            | 1.13 – 1.49 | <0.001 | 1.36            | 1.21 – 1.54 | <0.001 |
| <b>Number of THRs performed in calendar year<sup>2</sup><br/>(per 10 additional cases)</b> |                 |             |        |                 |             |        |
| 100% NHS funded (ref.)                                                                     | 1               | -           | -      | 1               | -           | -      |
| Some or all funded privately                                                               | 1.24            | 1.05 – 1.47 | 0.012  | 1.04            | 0.91 – 1.19 | 0.546  |
| <b>Number of stem-cup combinations used in calendar year</b>                               |                 |             |        |                 |             |        |
| ≤3 (ref.)                                                                                  | 1               | -           | -      | 1               | -           | -      |
| 4-6                                                                                        | 4.13            | 3.44 – 4.96 | <0.001 | 3.22            | 2.82 – 3.69 | <0.001 |
| 7-10                                                                                       | 10.8            | 8.62 – 13.6 | <0.001 | 6.23            | 5.15 – 7.53 | <0.001 |
| >10                                                                                        | 24.3            | 15.8 – 37.4 | <0.001 | 12.1            | 8.37 – 17.5 | <0.001 |
| <b>Proportion of THRs performed on patients with ASA grade III-V</b>                       |                 |             |        |                 |             |        |
| <25% (ref.)                                                                                | 1               | -           | -      | 1               | -           | -      |
| ≥25%                                                                                       | 1.11            | 0.94 – 1.31 | 0.214  | 1.21            | 1.05 – 1.38 | 0.007  |

1 – odds ratios, 95% confidence intervals and p-values are from logistic regression models adjusted for all exposure variables

Table S10 Sensitivity analysis 2a: Results from multivariable logistic regression models showing the association between surgeon-level factors (consultant in-charge) and use of new versus old stems and cups

| Exposure                                                                                   | Stems           |             |        | Cups            |             |        |
|--------------------------------------------------------------------------------------------|-----------------|-------------|--------|-----------------|-------------|--------|
|                                                                                            | OR <sup>1</sup> | (95% CI)    | p      | OR <sup>1</sup> | (95% CI)    | p      |
| <b>Proportion of THRs performed on patients &lt;55 years old</b>                           |                 |             |        |                 |             |        |
| <10% (ref.)                                                                                | 1               | -           | -      | 1               | -           | -      |
| ≥10%                                                                                       | 1.52            | 1.33 – 1.74 | <0.001 | 1.46            | 1.30 – 1.64 | <0.001 |
| <b>Number of THRs performed in calendar year<sup>2</sup><br/>(per 10 additional cases)</b> |                 |             |        |                 |             |        |
| 100% NHS funded (ref.)                                                                     | 1.02            | 1.00 – 1.04 | 0.039  | 1.05            | 1.04 – 1.07 | <0.001 |
| <b>Proportion of THRs funded privately</b>                                                 |                 |             |        |                 |             |        |
| 100% NHS funded (ref.)                                                                     | 1               | -           | -      | 1               | -           | -      |
| Some or all funded privately                                                               | 1.27            | 1.08 – 1.50 | 0.004  | 1.15            | 1.01 – 1.31 | 0.042  |
| <b>Number of stem-cup combinations used in calendar year</b>                               |                 |             |        |                 |             |        |
| ≤3 (ref.)                                                                                  | 1               | -           | -      | 1               | -           | -      |
| 4-6                                                                                        | 4.72            | 3.98 – 5.60 | <0.001 | 3.47            | 3.04 – 3.97 | <0.001 |
| 7-10                                                                                       | 11.2            | 8.87 – 14.1 | <0.001 | 6.16            | 5.06 – 7.49 | <0.001 |
| >10                                                                                        | 26.7            | 17.9 – 39.9 | <0.001 | 11.3            | 7.91 – 16.1 | <0.001 |
| <b>Proportion of THRs performed on patients with ASA grade III-V</b>                       |                 |             |        |                 |             |        |
| <25% (ref.)                                                                                | 1               | -           | -      | 1               | -           | -      |
| ≥25%                                                                                       | 1.15            | 0.98 – 1.35 | 0.077  | 1.13            | 0.99 – 1.29 | 0.064  |

1 – odds ratios, 95% confidence intervals and p-values are from logistic regression models adjusted for all exposure variables

Table S11 Sensitivity analysis 2b: Results from multivariable mixed-effects regression models (patients nested within 'consultant in-charge') of age, gender, categorised BMI, ASA grade, and source of funding on stem and cup age

|                               | Stems           |             |        | Cups            |             |        |
|-------------------------------|-----------------|-------------|--------|-----------------|-------------|--------|
|                               | OR <sup>1</sup> | (95% CI)    | p      | OR <sup>1</sup> | (95% CI)    | p      |
| <b>Age (years)</b>            |                 |             |        |                 |             |        |
| <55 years old                 | 1.89            | 1.79 – 1.99 | <0.001 | 1.32            | 1.26 – 1.37 | <0.001 |
| 55 to 80 (ref.)               | 1               | -           | -      | 1               | -           | -      |
| ≥ 80 years old                | 0.59            | 0.55 – 0.63 | <0.001 | 0.92            | 0.88 – 0.96 | <0.001 |
| <b>Gender</b>                 |                 |             |        |                 |             |        |
| Male (ref.)                   | 1               | -           | -      | 1               | -           | -      |
| Female                        | 0.87            | 0.84 – 0.91 | <0.001 | 1.05            | 1.02 – 1.09 | <0.001 |
| <b>BMI</b>                    |                 |             |        |                 |             |        |
| Underweight and normal (ref.) | 1               | -           | -      | 1               | -           | -      |
| Overweight                    | 1.01            | 0.96 – 1.07 | 0.663  | 0.95            | 0.91 – 0.98 | 0.005  |
| Class I Obese                 | 1.05            | 0.99 – 1.11 | 0.123  | 0.93            | 0.89 – 0.97 | <0.001 |
| Class II Obese                | 1.09            | 1.01 – 1.17 | 0.031  | 0.94            | 0.89 – 1.00 | 0.039  |
| Class III Obese               | 0.98            | 0.87 – 1.10 | 0.737  | 0.95            | 0.87 – 1.04 | 0.264  |
| <b>ASA grade</b>              |                 |             |        |                 |             |        |
| I (ref.)                      | 1               | -           | -      | 1               | -           | -      |
| II                            | 0.80            | 0.76 – 0.84 | <0.001 | 0.97            | 0.93 – 1.01 | 0.168  |
| III                           | 0.64            | 0.60 – 0.69 | <0.001 | 0.97            | 0.92 – 1.03 | 0.338  |
| IV + V                        | 0.62            | 0.44 – 0.87 | 0.006  | 1.00            | 0.81 – 1.23 | 0.981  |
| <b>Source of funding</b>      |                 |             |        |                 |             |        |
| NHS                           | 1               | -           | -      | 1               | -           | -      |
| Private                       | 1.14            | 1.07 – 1.21 | <0.001 | 1.13            | 1.08 – 1.18 | <0.001 |

1 – odds ratios, 95% confidence intervals and p-values are from mixed-effects logistic regression models adjusted for all exposure variables

Table S11 Sensitivity analysis 3: A comparison of results from multivariable mixed-effects regression models (patients nested within 'lead surgeon', excluding BMI) using a) patients with complete data for all exposures and BMI and, b) patients with complete data for all exposures excluding BMI

|                          | Stems                                                |             |        |                                            |             |        | Cups                                                 |             |        |                                            |             |        |
|--------------------------|------------------------------------------------------|-------------|--------|--------------------------------------------|-------------|--------|------------------------------------------------------|-------------|--------|--------------------------------------------|-------------|--------|
|                          | a) Complete cases only <sup>1</sup><br>(n = 431,955) |             |        | b) All cases <sup>2</sup><br>(n = 616,879) |             |        | a) Complete cases only <sup>1</sup><br>(n = 431,955) |             |        | b) All cases <sup>2</sup><br>(n = 616,879) |             |        |
|                          | OR <sup>3</sup>                                      | (95% CI)    | p      | OR <sup>3</sup>                            | (95% CI)    | p      | OR <sup>3</sup>                                      | (95% CI)    | p      | OR <sup>3</sup>                            | (95% CI)    | p      |
| <b>Age (years)</b>       |                                                      |             |        |                                            |             |        |                                                      |             |        |                                            |             |        |
| <55 years old            | 1.83                                                 | 1.74 – 1.93 | <0.001 | 1.81                                       | 1.73 – 1.90 | <0.001 | 1.31                                                 | 1.25 – 1.37 | <0.001 | 1.37                                       | 1.32 – 1.42 | <0.001 |
| 55 to 80 (ref.)          | 1                                                    | -           | -      | 1                                          | -           | -      | 1                                                    | -           | -      | 1                                          | -           | -      |
| ≥ 80 years old           | 0.59                                                 | 0.55 – 0.63 | <0.001 | 0.61                                       | 0.61 – 0.57 | <0.001 | 0.92                                                 | 0.88 – 0.96 | <0.001 | 0.95                                       | 0.92 – 0.99 | 0.008  |
| <b>Gender</b>            |                                                      |             |        |                                            |             |        |                                                      |             |        |                                            |             |        |
| Male (ref.)              | 1                                                    | -           | -      | 1                                          | -           | -      | 1                                                    | -           | -      | 1                                          | -           | -      |
| Female                   | 0.86                                                 | 0.83 – 0.90 | <0.001 | 0.84                                       | 0.82 – 0.87 | <0.001 | 1.07                                                 | 1.04 – 1.10 | <0.001 | 1.04                                       | 1.02 – 1.07 | 0.001  |
| <b>ASA grade</b>         |                                                      |             |        |                                            |             |        |                                                      |             |        |                                            |             |        |
| I (ref.)                 | 1                                                    | -           | -      | 1                                          | -           | -      | 1                                                    | -           | -      | 1                                          | -           | -      |
| II                       | 0.82                                                 | 0.78 – 0.87 | <0.001 | 0.82                                       | 0.78 – 0.86 | <0.001 | 0.98                                                 | 0.94 – 1.02 | 0.264  | 0.97                                       | 0.94 – 1.01 | 0.100  |
| III                      | 0.67                                                 | 0.62 – 0.72 | <0.001 | 0.66                                       | 0.62 – 0.70 | <0.001 | 0.99                                                 | 0.94 – 1.04 | 0.641  | 1.01                                       | 0.97 – 1.06 | 0.591  |
| IV + V                   | 0.65                                                 | 0.46 – 0.91 | 0.011  | 0.67                                       | 0.52 – 0.86 | 0.002  | 1.01                                                 | 0.82 – 1.25 | 0.927  | 1.12                                       | 0.95 – 1.32 | 0.175  |
| <b>Source of funding</b> |                                                      |             |        |                                            |             |        |                                                      |             |        |                                            |             |        |
| NHS (ref.)               | 1                                                    | -           | -      | 1                                          | -           | -      | 1                                                    | -           | -      | 1                                          | -           | -      |
| Private                  | 1.01                                                 | 0.95 – 1.08 | 0.688  | 1.02                                       | 0.97 – 1.08 | 0.403  | 1.09                                                 | 1.04 – 1.14 | <0.001 | 1.07                                       | 1.03 – 1.11 | 0.001  |

1 – The study sample for 'Complete cases only' was defined as those cases with complete data for all exposure variables (age, gender, ASA grade and source of funding) and BMI

2 - The study sample for 'All cases' was defined as those cases with complete data for all exposure variables (age, gender, ASA grade and source of funding)

3 – odds ratios, 95% confidence intervals and p-values are from mixed-effects logistic regression models adjusted for all exposure variables

*Figure S1 The cumulative introduction of new brands of cup and stem components for THRs, between January 1<sup>st</sup> 2008 and 26<sup>th</sup> February 2017*

Figure S2 STROBE Flow diagram
