# Supplementary material for: Understanding the uptake of new hip replacement implants in the UK: a cohort study using data from the National Joint Registry for England and Wales
Source: PubMed Central journal article supplement (PMC6886938; doi:10.1136/bmjopen-2019-029572), 2019-11-25

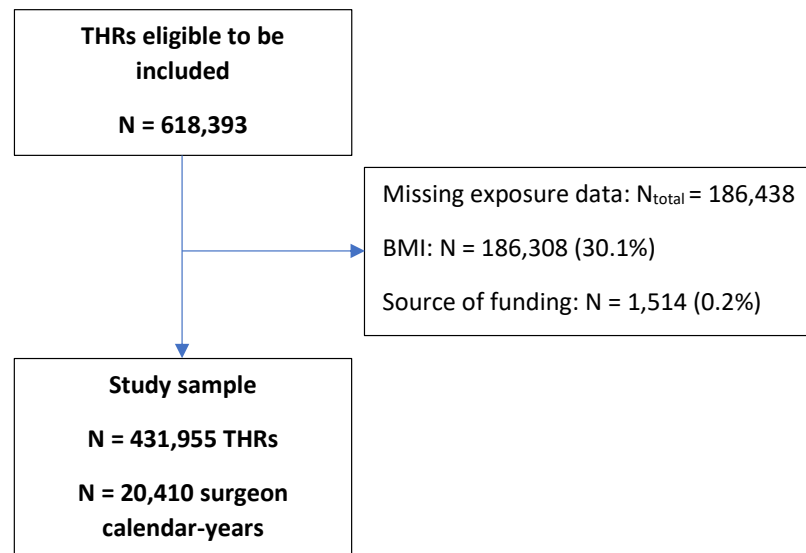

Supplement: bmjopen-2019-029572supp003.pdf [file bmjopen-2019-029572supp003.pdf]
